# Supplementary material for: Crystalline confinement leads to broadening of absorption spectra through activated spin-forbidden transitions in Alq3-Irppy2acac engineered crystals
Source: Royal Society of Chemistry journal article supplement (doi:10.1039/d3tc04126c), 2024-01-01
Supplement: d3tc04126c1.pdf [file d3tc04126c1.pdf]

1

## Supporting Information

### 2 Crystalline Confinement Leads to Broadening of Absorption Spectra through Activated 3 Spin-Forbidden Transitions in Alq<sub>3</sub>-Irppy<sub>2</sub>acac Engineered Crystals

4 Yufang Nie,<sup>a,b,1</sup> Heming Zhang,<sup>b,1\*</sup> Jiaxuan Wang,<sup>b</sup> Lianbao Ke,<sup>b</sup> Semion K. Saikin,<sup>c\*</sup> Hai Bi,<sup>b</sup>  
5 Wangqiao Chen,<sup>a</sup> Guofu Zhou<sup>a\*</sup>

6 a. Guangdong Provincial Key Laboratory of Optical Information Materials and Technology & Institute  
7 of Electronic Paper Displays, South China Academy of Advanced Optoelectronics

8 b. Jihua Laboratory, 28 Huandaonan road, Nanhai district, Foshan, Guangdong Province, China.

9 c. Kebotix, Inc., 501 Massachusetts Avenue, Cambridge, MA 02139, the United States of America.

10

### 11 Theoretical Background

12 Photoexcitation is a quantum transition described by the Fermi Golden rule as<sup>1-3</sup>

$$\sigma_{\text{ex}}(\omega) = \frac{4\pi^2\omega}{3c} \sum_{v,u} P_{iv}(T) |\langle \Phi_f | \hat{\mu}_{fi} | \Phi_i \rangle|^2 |\langle \Theta_{fu} | \Theta_{iv} \rangle|^2 \delta(\hbar\omega - E_{fi} - E_{fu} + E_{iv}), \quad (1)$$

14 where, the  $\Phi$  and  $\Theta$  are the electronic and vibrational wavefunctions, and indices  $i$  and  $f$   
15 represent the initial and final states, respectively;  $\omega$  is the circular frequency, the  $c$  is the speed of  
16 light in vacuum, the  $E_{fi}$  is the electronic energy difference between the initial and the final states,  
17 the  $E_{iv}$  is the vibrational energy level of the initial state and the  $E_{fu}$  is the vibrational energy level of  
18 the final state. This equation describes both electronic and vibrational transitions. The electronic  
19 transition is characterized by the matrix element  $\langle \Phi_f | \hat{\mu}_{fi} | \Phi_i \rangle$  called TDM, which is spin-allowed if  
20  $\Phi_i$  and  $\Phi_f$  have a same spin state. When the spin states of  $\Phi_i$  and  $\Phi_f$  are different, the value of the  
21 TDM is zero and the transition is spin-forbidden.

22 To allow a spin-forbidden transition, between the pure singlet,  $S$ , and triplet,  $T$ , the states have  
23 to mix with an intermediate state through the SOC as<sup>4-6</sup>

$$|S'\rangle = |S\rangle + \sum_n \sum_{m=-1}^1 \frac{\langle {}^3T_{n,m} | H_{\text{SO}} | S \rangle}{{}^1E_S - {}^3E_n} |{}^3T_{n,m}\rangle, \quad (2)$$

$$|T_m'\rangle = |T_m\rangle + \sum_n^{\{\text{singlets}\}} \frac{\langle {}^1S_n | H_{\text{SO}} | {}^3T_m \rangle}{{}^3E_T - {}^1E_n} |{}^1S_n\rangle, \quad (3)$$

26 where  $S'$  and  $T'$  are the mixed states and  $S_n$  and  $T_n$  are the intermediate states. The index  $n$  is  
 27 for the intermediates,  $m$  is the magnetic spin quantum number ( $m = -1, 0, 1$ ), and  $\hat{H}_{SO}$  is the SOC  
 28 Hamiltonian operator.

29 In this mixing, the TDM and SOC interplay to generate a new spin-forbidden TDM ( $TDM_{SF}$ ).  
 30 There are two processes that result in non-zero  $TDM_{SF}$ . When the intermediate state is a singlet ( $S_n$ ),  
 31 the  $TDM_{SF}$  from the  $S_0$  state to the  $T_k$  state (final state) is expressed as

$$32 \quad TDM_{SF} = \frac{\langle \Phi_{S_n} | \hat{\mu} | \Phi_{S_0} \rangle \langle \Phi_{T_k} | \hat{H}_{SO} | \Phi_{S_n} \rangle}{E_{T_k} - E_{S_n}} \quad (4)$$

33 It involves two parts: the spin-allowed part, naming  $TDM = \langle \Phi_{S_n} | \hat{\mu} | \Phi_{S_0} \rangle$  and the spin-  
 34 forbidden part, naming  $SOC = \langle \Phi_{T_k} | \hat{H}_{SO} | \Phi_{S_n} \rangle$ .

35 The spin-forbidden TDM through a triplet mixed intermediate ( $T_n$ ) is expressed as

$$36 \quad TDM_{SF} = \frac{\langle \Phi_{T_k} | \hat{\mu} | \Phi_{T_n} \rangle \langle \Phi_{T_n} | \hat{H}_{SO} | \Phi_{S_0} \rangle}{E_{T_n} - E_{S_0}} \quad (5)$$

37 The schematic graphic of the spin-forbidden excitation transition is shown in Figure 1(a). To  
 38 sum up, a strong  $TDM_{SF}$  requires both strong spin-allowed TDM and SOC.

39 Calculation Formulas for the Photophysical Parameters:

$$40 \quad k_r = \frac{\Phi_p}{\tau_p} \quad (6)$$

$$41 \quad k_{nr} = \frac{1 - \Phi_p}{\tau_p} \quad (7)$$

42 Where  $\Phi_p$  is the prompt phosphorescence component of  $\Phi_{PL}$ ;  $\tau_p$  is the lifetime of prompt  
 43 phosphorescence;  $k_r$  is the rate constant of radiative transition from  $T_1$  to  $S_0$ ;  $k_{nr}$  is the non-  
 44 radiative decay rate constant from  $T_1$  to  $S_0$ .

45

## 46 Experimental methods:

47 (1) Fabrication of engineered crystals

48 (2,4-pentanedionyl) bis (2-phenylpyridine) iridium ( $Irppy_2acac$ , 99%) (CAS:337526-85-9) and  
 49 tris(8-hydroxyquinoline) aluminum ( $Alq_3$ , 98%) (CAS: 2085-33-8) were purchased from Bide

50 Pharmatech Ltd. To take double-film annealing method get high-quality engineering organic crystal  
 51 (fig. S1). Firstly, Irppy<sub>2</sub>acac (90%) and Alq<sub>3</sub> (10%) were mixed and deposited on a quartz substrate  
 52 in a vacuum evaporator. The thickness of the deposited film was 120 nm. Secondly, another quartz  
 53 substrate is horizontally stacked face to face and then heated at 523k for 7 minutes. The temperature  
 54 control precision is ±0.2 K. (Heating at a temperature of 523K, according to TGA data, provided  
 55 in **figure S4**, the sample is safe and has not undergone decomposition). Then the heating was  
 56 stopped and the double substrates were naturally cooled. By comparing the crystal morphology of  
 57 different doping ratios, the optimal crystal morphology was found at the ratio of Irppy<sub>2</sub>acac (90):  
 58 Alq<sub>3</sub> (10), while crystals with other doping ratios are shown in the **figure S2**. The content of Ir and  
 59 Al elements in the sample was determined by inductively coupled plasma mass spectrometry (ICP-  
 60 MS), and the results showed that the content of Alq<sub>3</sub> in the crystal was 4.2%.

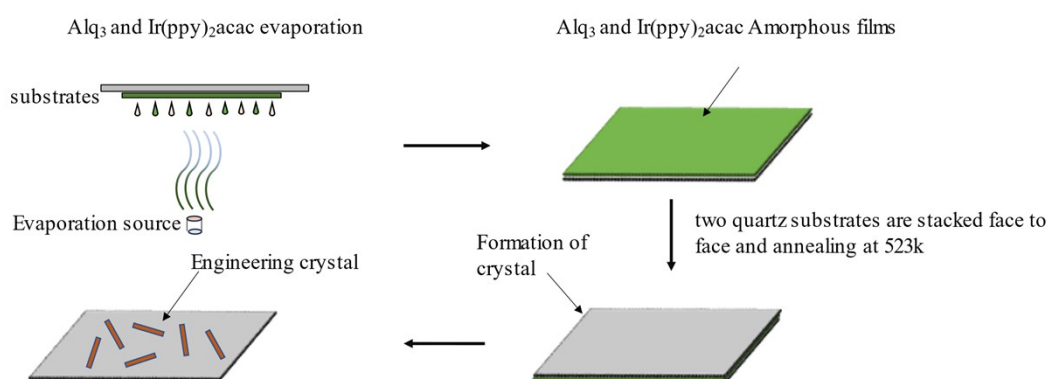

61  
 62 **Figure S1.** The process to fabricate engineered crystals.

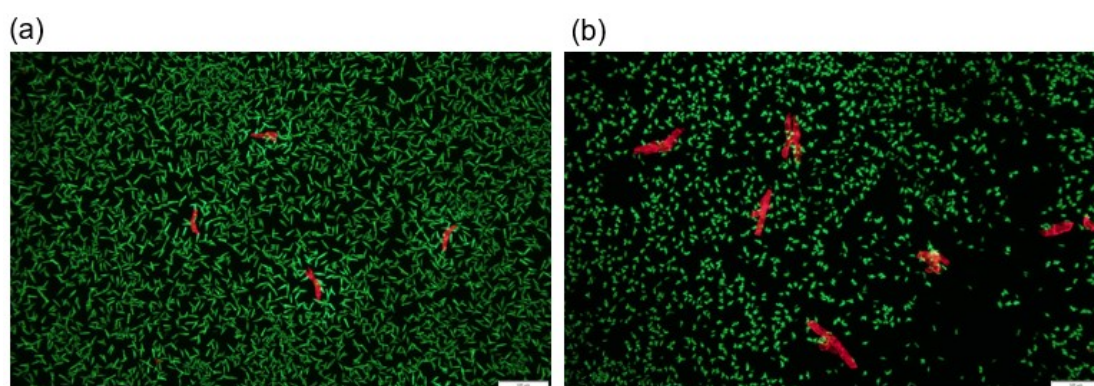

63  
 64 **Figure S2.** (a) Crystal morphology of Irppy<sub>2</sub>acac (30): Alq<sub>3</sub> (70), (b) Crystal morphology of Irppy<sub>2</sub>acac  
 65 (60): Alq<sub>3</sub> (40).

66 Crystals doped with more proportions of host and guest were presented. The images of the  
 67 morphology of some proportions of crystals are show in **Figure S2**. When the ratio between  
 68 Irppy<sub>2</sub>acac and Alq<sub>3</sub> is 3:7 or 6:4 a lot of green crystals can be observed. When the proportion of

69 Irppy<sub>2</sub>acac is increased the size of the red crystals tend to be larger and the green crystals tend to be  
70 smaller. When the ratio is raised to 9:1, as shown in Figure 1 in the main text, all the crystals convert  
71 to red.

72 Two crystallization phases with green and yellow luminescent colors were prepared. As shown  
73 in **Figure S3 (a)** green luminescent crystals were obtained under 523 K and yellow crystals were  
74 obtained when the temperature was increased to 543 K, as shown in **Figure S3 (b)**. The luminescent  
75 spectrum of the yellow crystals excited at 405 nm were measured as shown in **Figure S4**. Two peaks  
76 were observed. One is at 541 nm and the other is at about 592 nm. The spectrum of the green  
77 crystallization phase as shown in **Figure 1(c)** has two peaks. One peak is at 518 nm and the other  
78 peak is at 541 nm. And there is also a shoulder peak at about 585 nm that is close to the peak at 592  
79 nm of the yellow crystallization phase. Therefore, this strong peak at 592 nm should be one of the  
80 vibronic peak of Irppy<sub>2</sub>acac. In some certain crystallization phase, the vibronic coupling can be  
81 significantly enhanced. The thermal gravimetric analyzer (TGA) curves of Irppy<sub>2</sub>acac was also  
82 measured as shown in **Figure S5**. Below 613 K no significant weight loss was observed. The  
83 annealing at 543 K should be safe.

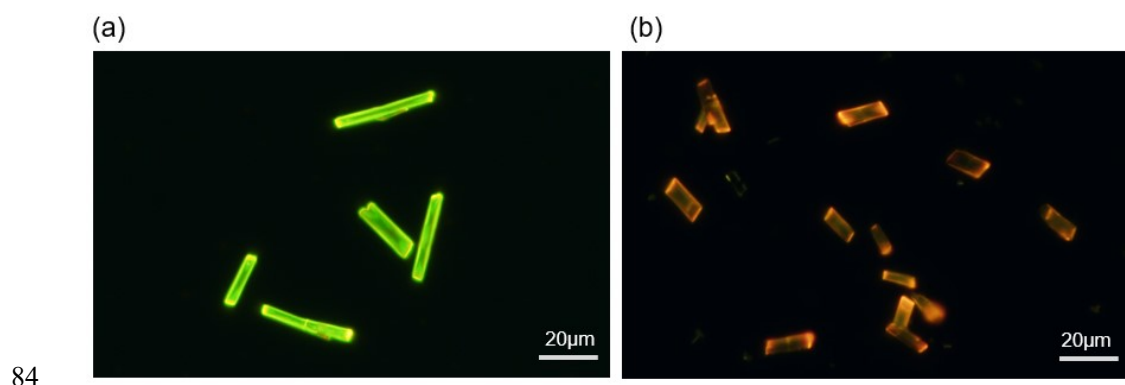

85 **Figure S3.** The different luminescent colors of Irppy<sub>2</sub>acac crystals (a) yellow green (heating  
86 temperature: 250°C); (b) Orange light (heating temperature: 270°C).

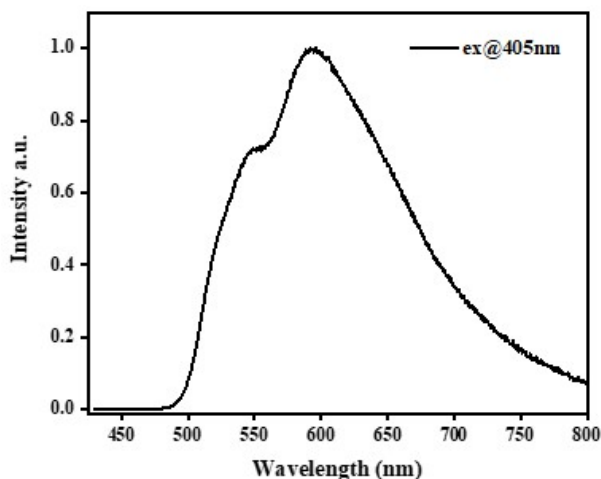

87

88

**Figure S4.** The luminescence spectrum of Irppy<sub>2</sub>acac orange single crystals.

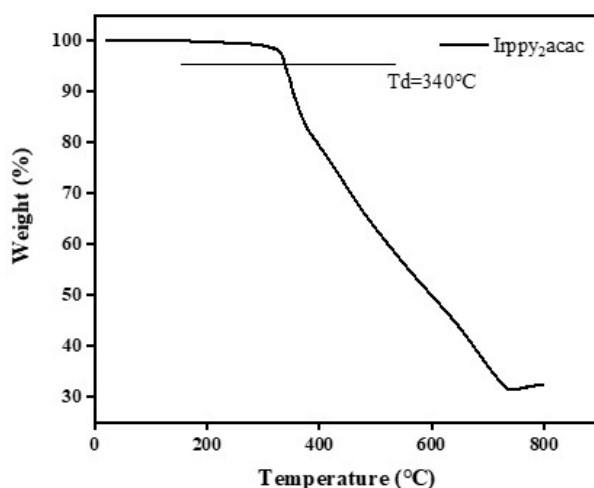

89

90

91

**Figure S5.** The thermal gravimetric analyzer (TGA) curves of Irppy<sub>2</sub>acac.

92 (2) Observation and spectrum measurement

93 The observation of morphology was performed using an Olympus fluorescence microscope  
 94 with UV light source and a Thermo Scientific Prisma E SEM. The photoluminescence spectra  
 95 were measured by a Renishaw microscope. The excitation light sources are 405 nm, 589 nm, and  
 96 632 nm laser. The photoluminescence lifetimes of the long wavelength phosphorescence were  
 97 measured by an Edinburgh spectrophotometer using a  $\mu$ s pulse flash lamp. XRD diffraction spectra  
 98 were measured by a Bruker D8 Advance instrument. The transient absorption spectra were  
 99 measured by a Helios Fire automated femtosecond Transient Absorption Spectrometer with a 390  
 100 nm excitation, and the time window is 8 ns.

101 **Computational details:**

102 Geometry optimizations and single point computations of a ground state were performed by a

103 DFT method. A hybrid functional M06L<sup>8</sup> was applied with D3 correction<sup>9</sup>, and the basis set was  
104 def2-SVP<sup>10-11</sup> and the auxiliary basis is def2/J. The spin-orbital coupling (SOC) matrix elements  
105 and the transition dipole moment (TDM) were calculated by TDA. For the computation of SOC, the  
106 DKH method was adopted. The basis set was DKH-def2-TZVP<sup>12-13</sup> a version for DKH method<sup>14</sup>  
107 (the auxiliary basis is SARC/J<sup>12-13</sup>). To well describe the SOC matrix elements, no effective core  
108 potential for Ir was adopted. All the methods above were provided by ORCA 5.0.4<sup>15-16</sup> and the grid  
109 size was set as high as “DEFGRID3”<sup>17</sup>.

110 The calculation of transition dipole moments between excited states was performed by  
111 Multiwfn 3.7<sup>18-22</sup> based on the computational results from ORCA. Based on the computations of  
112 SOC and TDM, the spin-forbidden TDMs (TDM<sub>SFS</sub>) can be calculated, and 30 intermediate states  
113 were considered. The conformer searching of the two-molecule system was performed by Crest  
114 module in XTB program<sup>23-27</sup>. The conformer searching depends on the initial geometry sent into the  
115 program. In this work, the initial geometries of a dimer were created by joining the two molecules  
116 in the direction of  $\pm x$ ,  $\pm y$ , and  $\pm z$  (shown in Figure S6). To avoid calculating conformers of extreme  
117 close geometries, e.g., the only difference between two conformers is the rotation of a methyl group,  
118 the minimum energy difference between two conformers was set 0.5 kcal mol<sup>-1</sup>. To cover different  
119 possible conformers in lattice confinements, five conformers with the lowest energies were selected  
120 as shown in Figure S7. The coordinates optimized in ground state were listed in Table S4-S8.  
121 Conformer 1 as the most stable one was studied emphatically. And the excitation spectra of all the  
122 five conformers were calculated and overlapped to create an excitation spectrum for the engineered  
123 crystal.

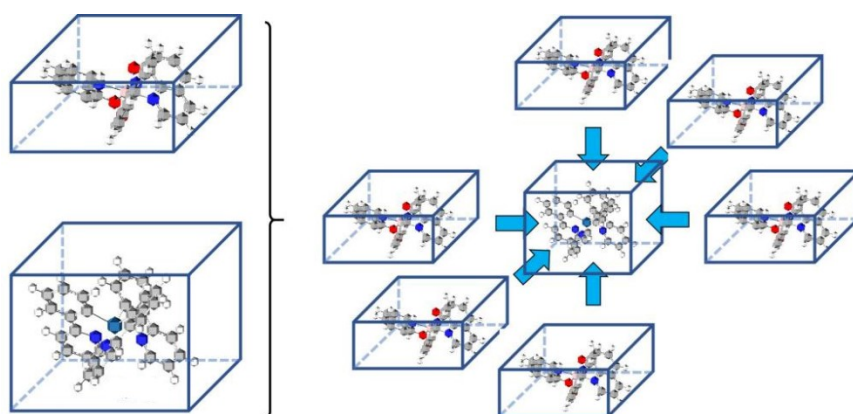

124

125 **Figure S6.** The generation of initial geometries for conformer searching. The initial geometries of  
126 two-molecule-systems were created by joining the two molecules in the direction of  $\pm x$ ,  $\pm y$ , and  $\pm z$ .  
127

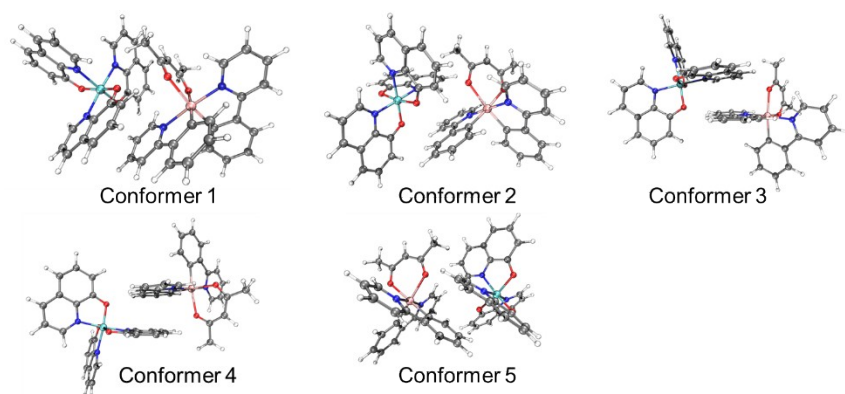

128

129 **Figure S7.** The graph of the five searched conformers with the lowest energies. From Conformer 1  
130 to 5 the energy raises. The coordinates were shown in Table S4 to S8.

131

132 **Supplementary data:**

133

134 **Table S1.** The luminescence lifetimes and the proportions at different temperatures of the  
 135 engineered crystals excited at 633 nm, 405 nm, and 590 nm.

136

| Ex@633 | Temperature /K | Lifetimes | $\chi^2$ | Ex@405 | Temperature | Lifetimes | $\chi^2$ |
|--------|----------------|-----------|----------|--------|-------------|-----------|----------|
| Em@702 |                | /μs       |          | Em@609 | /K          | /μs       |          |
|        | 77k            | 1.27      | 1.07     |        | 77k         | 12.59     | 1.06     |
|        |                | 12.07     |          |        |             | 20.34     |          |
|        | 127k           | 1.27      | 1.16     |        | 127k        | 10.29     | 1.05     |
|        |                | 11.88     |          |        |             | 18.89     |          |
|        | 177k           | 1.31      | 1.04     |        | 177k        | 9.54      | 1.09     |
|        |                | 11.58     |          |        |             | 18.09     |          |
|        | 227k           | 1.40      | 1.19     |        | 227k        | 9.11      | 1.12     |
|        |                | 12.00     |          |        |             | 17.56     |          |
|        | 298k           | 1.44      | 1.04     |        | 298k        | 6.04      | 1.12     |
|        |                | 12.78     |          |        |             | 14.98     |          |
|        | 350k           | 1.33      | 1.10     |        | 350k        | 3.89      | 1.05     |
|        |                | 12.36     |          |        |             | 11.67     |          |
|        | 400k           | 1.25      | 1.07     |        | 400k        | 3.32      | 1.11     |
|        |                | 10.61     |          |        |             | 8.59      |          |

| Ex@590 | Temperature | Lifetimes | $\chi^2$ |
|--------|-------------|-----------|----------|
| Em@670 | /K          | /μs       |          |
|        | 77K         | 18.3      | 0.98     |
|        |             | 26.9      |          |
|        | 127K        | 17.3      | 1.08     |
|        |             | 27.2      |          |
|        | 177K        | 17.5      | 1.17     |
|        |             | 32.4      |          |
|        | 227K        | 16.7      | 1.06     |
|        |             | 29.5      |          |
|        | 298K        | 15.5      | 0.86     |
|        |             | 29.6      |          |
|        | 350K        | 13.2      | 0.79     |
|        |             | 19.0      |          |
|        | 400K        | 10.6      | 0.98     |
|        |             | 10.0      |          |

137



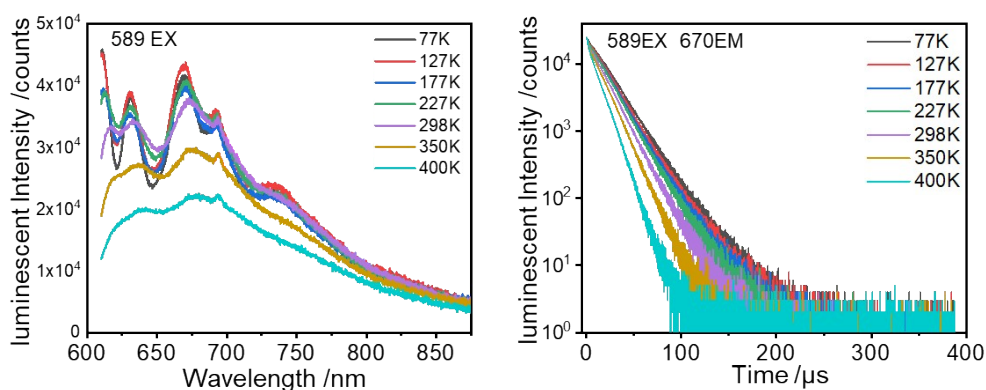

138

139 **Figure S8.** (a) the spectra excited at 589 nm, (b) the lifetime measurements at 670 nm excited at  
 140 590 nm.

141 For the luminescent spectrum excited at 589 nm, the maximum luminescent intensity is found  
 142 at 127 K. The luminescent intensities below 227 K are close. Higher than 227 K the luminescent  
 143 intensity becomes lower when the temperature increases. This behavior is in between the spectra  
 144 excited at 405 nm and 633 nm. The change of the lifetime with the temperature is similar with that  
 145 excited at 405 nm. The emission at 670 nm contains some component of the phosphorescence of  
 146 Irppy<sub>2</sub>acac as shown in Figure 1 (c) and the excitation at 589 nm also involves some component of  
 147 spin-allowed excitation. These two reasons lead to the results that the luminescent behavior excited  
 148 at 589 nm is to some extent different from the excitation at 633 nm.

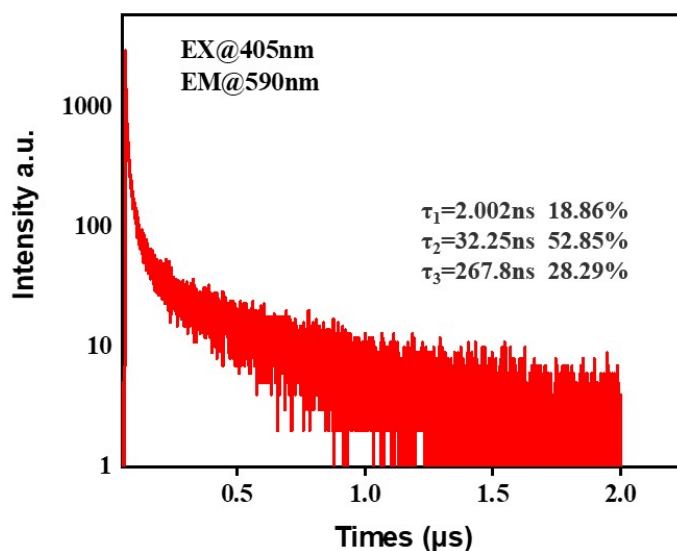

149

150 **Figure S9.** luminescent lifetimes of the activated emission peak excited at 405 nm about  
 151 Ir(ppy)<sub>2</sub>acac.

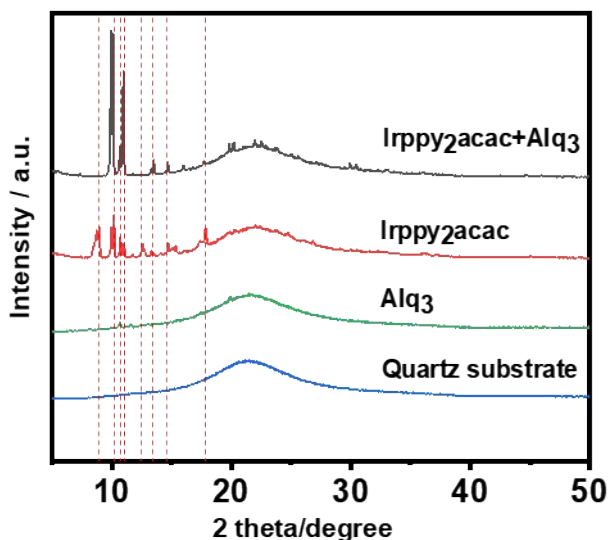

152

153 **Figure S10.** X-ray diffraction spectra of the engineered crystal and the single-component crystals.

154

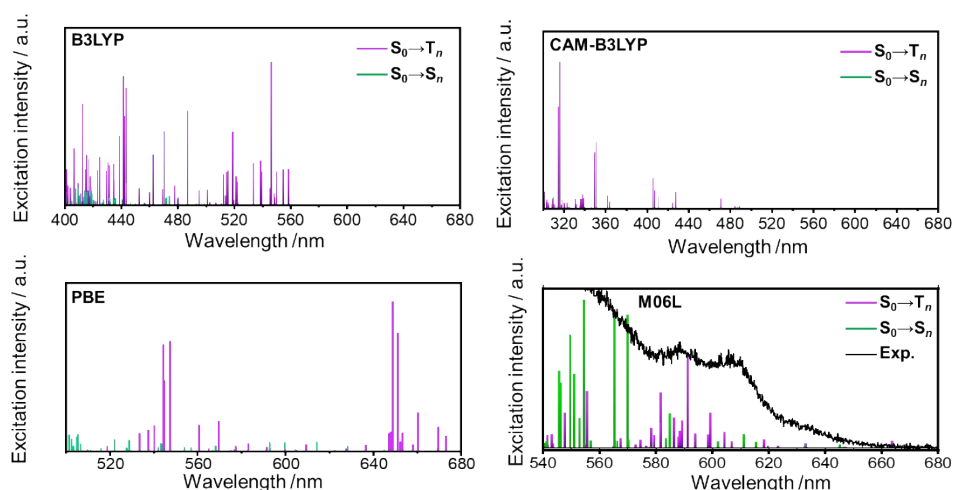

155

156 **Figure S11.** Calculated excitations using different functionals

157 Four functionals B3LYP (hybrid functional), CAM-B3LYP (range-separated hybrid  
 158 functional), PBE (pure GGA), and M06L (meta-GGA) were tested to calculate the containing spin-  
 159 allowed and spin-forbidden excitations. For B3LYP and cam-B3LYP the excitation energies are  
 160 overestimated. The excitations are shorter than 560 nm. The intensities of the spin-forbidden  
 161 excitations are overestimated. For PBE, the excitation energies are underestimated and the  
 162 wavelength of the strongest excitation extends to over 640 nm, which is away from the experimental  
 163 observation that the maximum absorption is at about 588 nm. The intensities of the spin-forbidden  
 164 excitations are also overestimated. On the whole, M06L is a proper functional to give a best  
 165 performance in reproducing the experimental spectrum. This may be because M06L does not contain

166 the Hartree Fock component as a Meta-GGA functional and thus the low excitation energies are not  
 167 overestimated. But it can approximately describe the dispersion which is difficult for other pure  
 168 GGA functionals like PBE to describe. It also contains the complicated computation of electron  
 169 kinetic energy density which may also help reproduce the excitation intensity.

170

s

171 **Table S1.** The original TDM elements between  $S_0$  and  $S_n$  calculated at M06L/def2-svp level.

| States |       | TDM elements between $S_0$ and $S_n$ /debye |             |             |             |             |
|--------|-------|---------------------------------------------|-------------|-------------|-------------|-------------|
| $S_0$  | $S_n$ | Conformer 1                                 | Conformer 2 | Conformer 3 | Conformer 4 | Conformer 5 |
| 0      | 1     | 0.44                                        | 0.17        | 0.47        | 0.52        | 0.12        |
| 0      | 2     | 0.39                                        | 0.22        | 0.17        | 0.26        | 0.27        |
| 0      | 3     | 0.68                                        | 0.23        | 0.52        | 0.36        | 0.08        |
| 0      | 4     | 0.07                                        | 0.10        | 0.03        | 0.18        | 0.38        |
| 0      | 5     | 0.35                                        | 0.37        | 0.81        | 1.57        | 1.59        |
| 0      | 6     | 0.11                                        | 1.15        | 1.64        | 1.08        | 0.07        |
| 0      | 7     | 0.43                                        | 0.12        | 0.73        | 1.17        | 0.17        |
| 0      | 8     | 0.36                                        | 0.14        | 0.31        | 0.34        | 0.37        |
| 0      | 9     | 1.43                                        | 1.26        | 0.08        | 0.62        | 0.49        |
| 0      | 10    | 0.40                                        | 0.85        | 0.12        | 0.09        | 0.70        |
| 0      | 11    | 0.42                                        | 0.41        | 1.22        | 1.23        | 0.50        |
| 0      | 12    | 0.18                                        | 0.36        | 0.43        | 0.47        | 0.08        |
| 0      | 13    | 0.93                                        | 0.88        | 0.08        | 0.20        | 0.79        |
| 0      | 14    | 0.90                                        | 1.44        | 0.74        | 0.75        | 0.17        |
| 0      | 15    | 0.62                                        | 0.84        | 0.54        | 1.32        | 0.79        |
| 0      | 16    | 1.04                                        | 0.56        | 1.26        | 0.45        | 0.51        |
| 0      | 17    | 0.29                                        | 0.14        | 1.78        | 1.16        | 0.43        |
| 0      | 18    | 1.23                                        | 0.15        | 0.38        | 1.78        | 0.34        |
| 0      | 19    | 0.50                                        | 0.82        | 0.92        | 1.10        | 0.78        |
| 0      | 20    | 0.17                                        | 0.34        | 0.30        | 0.16        | 0.15        |
| 0      | 21    | 0.70                                        | 1.37        | 0.31        | 0.47        | 0.33        |
| 0      | 22    | 0.73                                        | 1.36        | 1.66        | 0.09        | 0.45        |
| 0      | 23    | 1.23                                        | 0.42        | 0.82        | 0.36        | 1.61        |
| 0      | 24    | 0.68                                        | 0.42        | 0.23        | 1.21        | 1.46        |
| 0      | 25    | 0.37                                        | 0.28        | 0.61        | 0.50        | 0.34        |
| 0      | 26    | 0.90                                        | 1.01        | 0.38        | 1.99        | 0.38        |
| 0      | 27    | 1.35                                        | 0.27        | 2.09        | 0.83        | 0.39        |
| 0      | 28    | 0.98                                        | 1.74        | 0.97        | 1.09        | 0.49        |
| 0      | 29    | 0.79                                        | 0.91        | 0.35        | 0.28        | 0.68        |
| 0      | 30    | 0.73                                        | 1.29        | 0.90        | 0.18        | 0.10        |

172

173 **Table S2.** The original TDM elements between  $T_i$  and  $T_j$  calculated at M06L/def2-svp level.

| States |       | TDM elements between $T_i$ and $T_j$ /debye |             |             |             |             |
|--------|-------|---------------------------------------------|-------------|-------------|-------------|-------------|
| $T_i$  | $T_j$ | Conformer 1                                 | Conformer 2 | Conformer 3 | Conformer 4 | Conformer 5 |
| 1      | 1     | 0.00                                        | 0.00        | 0.00        | 0.00        | 0.00        |
| 1      | 2     | 5.30                                        | 4.11        | 2.94        | 2.84        | 1.30        |
| 1      | 3     | 8.61                                        | 8.28        | 2.28        | 1.08        | 9.66        |
| 1      | 4     | 0.34                                        | 0.37        | 3.40        | 0.38        | 0.36        |
| 1      | 5     | 0.00                                        | 0.36        | 2.77        | 4.43        | 0.18        |
| 1      | 6     | 0.46                                        | 0.92        | 0.38        | 0.18        | 0.15        |
| 1      | 7     | 0.62                                        | 0.37        | 0.12        | 0.11        | 0.48        |
| 1      | 8     | 0.44                                        | 0.85        | 0.27        | 0.36        | 0.26        |
| 1      | 9     | 0.33                                        | 0.68        | 0.37        | 0.36        | 0.33        |
| 1      | 10    | 0.82                                        | 0.26        | 0.58        | 0.36        | 0.32        |
| 1      | 11    | 0.31                                        | 0.00        | 1.19        | 0.17        | 1.45        |
| 1      | 12    | 0.90                                        | 0.96        | 0.13        | 0.24        | 0.00        |
| 1      | 13    | 0.72                                        | 0.10        | 0.37        | 0.12        | 0.20        |
| 1      | 14    | 0.24                                        | 0.13        | 1.42        | 1.37        | 0.00        |
| 1      | 15    | 0.31                                        | 0.59        | 0.04        | 0.01        | 0.00        |
| 1      | 16    | 0.07                                        | 0.00        | 0.15        | 0.05        | 0.82        |
| 1      | 17    | 0.00                                        | 0.61        | 0.00        | 0.00        | 1.22        |
| 1      | 18    | 0.00                                        | 0.16        | 0.00        | 0.00        | 0.94        |
| 1      | 19    | 0.08                                        | 0.19        | 0.02        | 0.00        | 0.05        |
| 1      | 20    | 0.18                                        | 0.04        | 0.00        | 0.00        | 0.47        |
| 1      | 21    | 3.23                                        | 0.00        | 0.52        | 0.05        | 0.06        |
| 1      | 22    | 4.56                                        | 0.33        | 5.82        | 0.02        | 0.00        |
| 1      | 23    | 0.05                                        | 0.57        | 0.33        | 0.00        | 0.00        |
| 1      | 24    | 0.85                                        | 0.51        | 0.26        | 5.82        | 0.00        |
| 1      | 25    | 2.53                                        | 0.35        | 0.13        | 0.00        | 0.26        |
| 1      | 26    | 0.83                                        | 0.00        | 0.47        | 0.55        | 0.00        |
| 1      | 27    | 0.55                                        | 6.03        | 0.00        | 0.00        | 0.00        |
| 1      | 28    | 0.08                                        | 0.00        | 0.05        | 0.09        | 0.00        |
| 1      | 29    | 0.11                                        | 0.00        | 0.00        | 0.11        | 6.24        |
| 1      | 30    | 0.39                                        | 0.00        | 0.00        | 0.27        | 0.00        |
| 2      | 2     | 0.00                                        | 0.00        | 0.00        | 0.00        | 0.00        |
| 2      | 3     | 11.03                                       | 8.30        | 0.00        | 0.00        | 0.00        |
| 2      | 4     | 0.00                                        | 0.00        | 2.42        | 0.34        | 0.00        |
| 2      | 5     | 0.34                                        | 0.20        | 1.71        | 3.00        | 1.28        |
| 2      | 6     | 0.12                                        | 0.25        | 0.09        | 0.66        | 7.25        |
| 2      | 7     | 0.18                                        | 0.22        | 1.49        | 0.42        | 0.00        |
| 2      | 8     | 0.82                                        | 0.09        | 0.00        | 0.56        | 5.55        |
| 2      | 9     | 0.63                                        | 1.46        | 0.89        | 0.67        | 4.88        |
| 2      | 10    | 0.54                                        | 0.33        | 1.11        | 0.29        | 0.48        |
| 2      | 11    | 0.22                                        | 0.87        | 0.56        | 0.30        | 0.31        |

|   |    |      |      |       |       |      |
|---|----|------|------|-------|-------|------|
| 2 | 12 | 0.19 | 0.52 | 0.37  | 0.19  | 0.40 |
| 2 | 13 | 1.48 | 0.00 | 1.32  | 1.12  | 2.32 |
| 2 | 14 | 0.87 | 0.62 | 0.00  | 0.00  | 0.50 |
| 2 | 15 | 0.68 | 0.05 | 0.03  | 0.02  | 0.00 |
| 2 | 16 | 0.18 | 1.18 | 0.13  | 0.14  | 0.00 |
| 2 | 17 | 0.00 | 0.21 | 0.00  | 0.35  | 0.47 |
| 2 | 18 | 0.43 | 0.00 | 1.42  | 0.97  | 0.31 |
| 2 | 19 | 0.29 | 0.07 | 0.02  | 0.93  | 0.11 |
| 2 | 20 | 0.16 | 0.12 | 0.40  | 0.00  | 0.00 |
| 2 | 21 | 0.16 | 0.61 | 0.35  | 0.07  | 0.00 |
| 2 | 22 | 0.11 | 0.08 | 0.00  | 0.04  | 0.00 |
| 2 | 23 | 0.03 | 0.14 | 0.24  | 0.00  | 0.00 |
| 2 | 24 | 0.55 | 0.12 | 0.19  | 0.00  | 1.08 |
| 2 | 25 | 0.00 | 0.42 | 0.06  | 0.00  | 0.00 |
| 2 | 26 | 0.00 | 0.00 | 0.25  | 0.27  | 0.00 |
| 2 | 27 | 1.29 | 0.00 | 0.00  | 0.00  | 0.00 |
| 2 | 28 | 5.36 | 0.00 | 0.04  | 0.15  | 0.00 |
| 2 | 29 | 1.08 | 0.00 | 0.00  | 0.19  | 0.59 |
| 2 | 30 | 0.53 | 0.00 | 0.00  | 0.47  | 0.00 |
| 3 | 3  | 0.00 | 0.00 | 0.00  | 0.00  | 0.00 |
| 3 | 4  | 0.00 | 0.06 | 0.32  | 0.02  | 0.99 |
| 3 | 5  | 0.00 | 1.12 | 0.64  | 2.66  | 0.22 |
| 3 | 6  | 0.40 | 0.49 | 2.67  | 11.51 | 1.12 |
| 3 | 7  | 0.31 | 0.23 | 4.12  | 1.11  | 1.63 |
| 3 | 8  | 0.85 | 0.00 | 0.69  | 3.48  | 0.45 |
| 3 | 9  | 0.18 | 1.82 | 16.72 | 5.81  | 0.67 |
| 3 | 10 | 0.20 | 0.66 | 16.12 | 18.09 | 0.00 |
| 3 | 11 | 0.10 | 0.00 | 0.00  | 20.15 | 2.44 |
| 3 | 12 | 0.30 | 0.62 | 1.32  | 0.00  | 0.00 |
| 3 | 13 | 1.47 | 0.83 | 15.12 | 10.51 | 0.32 |
| 3 | 14 | 0.44 | 0.37 | 0.79  | 2.36  | 0.00 |
| 3 | 15 | 0.39 | 0.19 | 0.21  | 0.17  | 0.33 |
| 3 | 16 | 0.89 | 0.22 | 0.11  | 0.03  | 0.94 |
| 3 | 17 | 0.00 | 0.24 | 6.22  | 14.39 | 0.52 |
| 3 | 18 | 0.63 | 0.32 | 0.00  | 0.32  | 0.61 |
| 3 | 19 | 0.84 | 0.08 | 0.31  | 0.16  | 0.18 |
| 3 | 20 | 0.28 | 0.83 | 0.00  | 0.14  | 0.57 |
| 3 | 21 | 0.02 | 0.00 | 0.00  | 0.13  | 0.07 |
| 3 | 32 | 0.00 | 0.36 | 4.22  | 0.33  | 0.00 |
| 3 | 23 | 0.19 | 0.57 | 0.39  | 4.90  | 0.00 |
| 3 | 24 | 1.28 | 0.86 | 5.71  | 1.05  | 0.00 |
| 3 | 25 | 0.00 | 0.58 | 1.26  | 0.05  | 0.65 |
| 3 | 26 | 0.00 | 0.59 | 0.00  | 0.00  | 1.38 |
| 3 | 27 | 1.35 | 0.00 | 0.92  | 0.09  | 0.00 |

|   |    |       |       |       |       |       |
|---|----|-------|-------|-------|-------|-------|
| 3 | 28 | 0.19  | 0.00  | 0.15  | 0.14  | 0.00  |
| 3 | 29 | 0.26  | 0.00  | 0.10  | 0.25  | 0.00  |
| 3 | 30 | 0.89  | 0.00  | 0.00  | 0.07  | 0.00  |
| 4 | 4  | 0.00  | 0.00  | 0.00  | 0.00  | 0.00  |
| 4 | 5  | 5.25  | 0.00  | 12.68 | 0.43  | 0.00  |
| 4 | 6  | 7.55  | 10.71 | 18.27 | 11.24 | 0.00  |
| 4 | 7  | 4.63  | 22.95 | 0.21  | 0.00  | 10.99 |
| 4 | 8  | 0.00  | 4.12  | 0.00  | 0.00  | 0.00  |
| 4 | 9  | 0.87  | 0.00  | 1.44  | 0.02  | 0.24  |
| 4 | 10 | 0.84  | 4.88  | 0.64  | 0.12  | 0.00  |
| 4 | 11 | 0.23  | 0.10  | 4.45  | 0.15  | 1.46  |
| 4 | 12 | 1.71  | 7.16  | 0.00  | 3.29  | 1.29  |
| 4 | 13 | 0.00  | 0.29  | 0.85  | 0.07  | 0.00  |
| 4 | 14 | 0.58  | 1.39  | 0.00  | 0.00  | 0.00  |
| 4 | 15 | 0.74  | 0.54  | 0.41  | 0.64  | 0.04  |
| 4 | 16 | 0.18  | 2.20  | 1.40  | 3.31  | 1.64  |
| 4 | 17 | 0.43  | 0.00  | 1.41  | 0.08  | 1.08  |
| 4 | 18 | 0.00  | 4.97  | 0.00  | 0.03  | 1.33  |
| 4 | 19 | 0.20  | 0.00  | 0.26  | 0.02  | 0.00  |
| 4 | 20 | 0.00  | 21.16 | 0.00  | 1.21  | 2.12  |
| 4 | 21 | 1.45  | 0.00  | 1.70  | 1.00  | 0.31  |
| 4 | 42 | 2.05  | 0.04  | 0.00  | 0.57  | 0.35  |
| 4 | 23 | 0.10  | 0.03  | 1.44  | 0.03  | 0.23  |
| 4 | 24 | 0.00  | 0.02  | 0.78  | 0.00  | 0.00  |
| 4 | 25 | 4.70  | 0.02  | 0.47  | 0.73  | 1.08  |
| 4 | 26 | 1.90  | 0.17  | 1.06  | 0.07  | 0.00  |
| 4 | 27 | 0.00  | 0.41  | 0.93  | 1.17  | 0.00  |
| 4 | 28 | 0.00  | 0.48  | 0.38  | 0.32  | 0.00  |
| 4 | 29 | 0.09  | 0.06  | 0.98  | 0.18  | 0.00  |
| 4 | 30 | 0.00  | 0.09  | 0.36  | 0.78  | 1.27  |
| 5 | 5  | 0.00  | 0.00  | 0.00  | 0.00  | 0.00  |
| 5 | 6  | 8.29  | 0.00  | 18.92 | 4.29  | 1.96  |
| 5 | 7  | 6.82  | 0.00  | 0.10  | 8.38  | 0.00  |
| 5 | 8  | 0.00  | 0.00  | 0.01  | 18.84 | 4.80  |
| 5 | 9  | 35.13 | 1.63  | 0.96  | 0.90  | 6.54  |
| 5 | 10 | 1.28  | 0.00  | 0.30  | 1.10  | 12.52 |
| 5 | 11 | 0.59  | 0.00  | 5.64  | 1.49  | 0.09  |
| 5 | 12 | 0.45  | 0.00  | 0.53  | 1.71  | 0.13  |
| 5 | 13 | 0.00  | 0.00  | 0.42  | 0.74  | 3.16  |
| 5 | 14 | 1.37  | 0.00  | 0.23  | 0.48  | 0.24  |
| 5 | 15 | 0.79  | 0.00  | 0.97  | 0.22  | 0.22  |
| 5 | 16 | 0.43  | 0.00  | 2.96  | 1.31  | 0.00  |
| 5 | 17 | 0.80  | 3.51  | 1.65  | 1.26  | 0.27  |
| 5 | 18 | 1.31  | 0.00  | 0.00  | 0.41  | 0.18  |

|   |    |       |       |       |       |       |
|---|----|-------|-------|-------|-------|-------|
| 5 | 19 | 0.89  | 1.13  | 0.82  | 0.21  | 4.99  |
| 5 | 20 | 0.00  | 0.00  | 0.00  | 0.24  | 0.00  |
| 5 | 21 | 0.32  | 0.00  | 0.97  | 0.65  | 0.03  |
| 5 | 22 | 0.23  | 0.55  | 0.36  | 0.26  | 0.19  |
| 5 | 23 | 0.07  | 0.67  | 0.49  | 0.17  | 0.08  |
| 5 | 24 | 0.00  | 0.71  | 0.21  | 0.34  | 0.22  |
| 5 | 25 | 0.43  | 0.82  | 0.45  | 0.05  | 0.00  |
| 5 | 26 | 1.33  | 0.00  | 0.79  | 1.02  | 0.26  |
| 5 | 27 | 0.27  | 0.00  | 0.26  | 0.06  | 0.00  |
| 5 | 28 | 2.42  | 0.29  | 1.18  | 1.31  | 0.26  |
| 5 | 29 | 0.62  | 0.99  | 0.52  | 1.09  | 0.94  |
| 5 | 30 | 0.00  | 0.21  | 0.71  | 3.78  | 0.00  |
| 6 | 6  | 0.00  | 0.00  | 0.00  | 0.00  | 0.00  |
| 6 | 7  | 15.56 | 4.87  | 0.13  | 3.42  | 0.00  |
| 6 | 8  | 0.00  | 9.86  | 0.03  | 24.42 | 7.60  |
| 6 | 9  | 19.04 | 0.00  | 0.48  | 22.43 | 15.40 |
| 6 | 10 | 10.07 | 11.22 | 0.58  | 9.39  | 5.97  |
| 6 | 11 | 29.55 | 0.49  | 0.83  | 3.55  | 9.43  |
| 6 | 12 | 9.36  | 11.56 | 2.89  | 0.37  | 5.78  |
| 6 | 13 | 0.00  | 11.35 | 0.47  | 24.19 | 8.66  |
| 6 | 14 | 21.00 | 20.05 | 1.28  | 22.10 | 6.06  |
| 6 | 15 | 11.17 | 12.98 | 1.74  | 0.23  | 0.65  |
| 6 | 16 | 7.68  | 17.33 | 1.05  | 0.36  | 0.00  |
| 6 | 17 | 0.62  | 0.02  | 1.16  | 3.54  | 0.60  |
| 6 | 18 | 9.88  | 23.11 | 0.00  | 0.47  | 0.40  |
| 6 | 19 | 2.78  | 0.05  | 3.54  | 0.45  | 4.91  |
| 6 | 20 | 0.00  | 6.80  | 0.00  | 0.23  | 0.00  |
| 6 | 21 | 0.30  | 0.81  | 0.15  | 0.14  | 0.06  |
| 6 | 22 | 1.70  | 0.32  | 1.96  | 0.58  | 0.37  |
| 6 | 23 | 1.42  | 0.23  | 0.32  | 0.40  | 0.13  |
| 6 | 24 | 0.00  | 0.10  | 0.04  | 1.48  | 1.42  |
| 6 | 25 | 1.23  | 0.12  | 0.41  | 0.09  | 0.00  |
| 6 | 26 | 0.76  | 1.10  | 0.05  | 0.23  | 0.54  |
| 6 | 27 | 0.05  | 1.86  | 0.72  | 0.09  | 0.06  |
| 6 | 28 | 0.32  | 0.00  | 0.27  | 0.36  | 0.58  |
| 6 | 29 | 0.10  | 0.32  | 0.74  | 0.26  | 0.15  |
| 6 | 30 | 0.00  | 0.98  | 0.13  | 0.82  | 0.00  |
| 7 | 7  | 0.00  | 0.00  | 0.00  | 0.00  | 0.00  |
| 7 | 8  | 33.48 | 11.46 | 9.93  | 4.88  | 0.00  |
| 7 | 9  | 13.86 | 0.00  | 4.61  | 5.89  | 0.41  |
| 7 | 10 | 34.43 | 9.20  | 10.41 | 6.38  | 0.00  |
| 7 | 11 | 25.67 | 2.73  | 0.00  | 39.16 | 2.62  |
| 7 | 12 | 23.52 | 2.97  | 5.07  | 0.00  | 0.00  |
| 7 | 13 | 0.71  | 0.89  | 9.85  | 9.16  | 0.00  |

|   |    |       |       |       |       |       |
|---|----|-------|-------|-------|-------|-------|
| 7 | 14 | 5.18  | 5.69  | 0.26  | 1.25  | 1.28  |
| 7 | 15 | 10.78 | 10.73 | 0.13  | 0.05  | 0.00  |
| 7 | 16 | 27.41 | 4.40  | 0.07  | 0.01  | 3.08  |
| 7 | 17 | 0.55  | 0.02  | 3.86  | 0.47  | 1.70  |
| 7 | 18 | 7.67  | 16.63 | 0.75  | 1.31  | 1.99  |
| 7 | 19 | 29.00 | 0.03  | 0.20  | 3.09  | 0.00  |
| 7 | 20 | 0.37  | 10.17 | 1.38  | 0.07  | 2.87  |
| 7 | 21 | 0.83  | 1.67  | 0.00  | 0.03  | 0.20  |
| 7 | 22 | 2.21  | 0.19  | 0.29  | 0.29  | 0.05  |
| 7 | 23 | 0.47  | 0.14  | 0.37  | 1.12  | 0.00  |
| 7 | 24 | 0.03  | 0.11  | 3.38  | 0.34  | 0.00  |
| 7 | 25 | 1.16  | 0.07  | 1.60  | 0.14  | 1.16  |
| 7 | 26 | 1.26  | 0.84  | 0.00  | 0.00  | 0.00  |
| 7 | 27 | 0.09  | 0.47  | 0.83  | 0.10  | 0.00  |
| 7 | 28 | 0.30  | 0.08  | 0.09  | 0.15  | 0.34  |
| 7 | 29 | 0.16  | 0.29  | 0.06  | 0.35  | 0.00  |
| 7 | 30 | 0.05  | 1.15  | 0.23  | 0.22  | 0.10  |
| 8 | 8  | 0.00  | 0.00  | 0.00  | 0.00  | 0.00  |
| 8 | 9  | 0.00  | 0.00  | 0.37  | 12.27 | 4.87  |
| 8 | 10 | 0.00  | 19.08 | 2.25  | 15.06 | 14.60 |
| 8 | 11 | 0.00  | 7.17  | 0.00  | 11.16 | 17.66 |
| 8 | 12 | 0.00  | 12.56 | 10.16 | 0.00  | 10.12 |
| 8 | 13 | 5.87  | 7.82  | 2.14  | 11.29 | 9.51  |
| 8 | 14 | 0.00  | 8.69  | 2.31  | 3.95  | 10.29 |
| 8 | 15 | 0.00  | 2.45  | 0.00  | 0.06  | 0.52  |
| 8 | 16 | 0.00  | 6.19  | 0.00  | 0.01  | 0.00  |
| 8 | 17 | 0.21  | 0.10  | 0.00  | 0.98  | 1.00  |
| 8 | 18 | 0.00  | 0.22  | 0.00  | 1.19  | 0.67  |
| 8 | 19 | 0.00  | 0.30  | 0.00  | 0.68  | 0.60  |
| 8 | 20 | 3.11  | 3.99  | 2.82  | 0.13  | 0.00  |
| 8 | 21 | 0.00  | 0.20  | 0.00  | 0.02  | 0.10  |
| 8 | 22 | 0.00  | 0.24  | 0.94  | 0.55  | 0.60  |
| 8 | 23 | 0.00  | 0.34  | 0.21  | 1.84  | 0.23  |
| 8 | 24 | 0.28  | 0.43  | 0.49  | 0.65  | 1.28  |
| 8 | 25 | 0.00  | 0.20  | 0.55  | 0.11  | 0.00  |
| 8 | 26 | 0.17  | 0.14  | 0.00  | 0.00  | 0.77  |
| 8 | 27 | 0.63  | 1.26  | 0.17  | 0.11  | 0.12  |
| 8 | 28 | 0.20  | 0.00  | 0.03  | 0.18  | 0.91  |
| 8 | 29 | 1.02  | 0.03  | 0.00  | 0.21  | 0.20  |
| 8 | 30 | 0.44  | 0.18  | 0.19  | 0.14  | 0.00  |
| 9 | 9  | 0.00  | 0.00  | 0.00  | 0.00  | 0.00  |
| 9 | 10 | 19.52 | 0.00  | 5.61  | 13.25 | 31.99 |
| 9 | 11 | 9.14  | 0.00  | 0.23  | 22.14 | 10.83 |
| 9 | 12 | 15.07 | 0.00  | 16.60 | 0.00  | 1.73  |



|    |    |       |       |       |       |       |
|----|----|-------|-------|-------|-------|-------|
| 9  | 13 | 0.00  | 0.00  | 22.64 | 5.24  | 28.85 |
| 9  | 14 | 9.50  | 0.00  | 0.13  | 10.86 | 1.08  |
| 9  | 15 | 5.00  | 0.00  | 8.44  | 0.35  | 1.59  |
| 9  | 16 | 18.62 | 0.00  | 0.50  | 0.07  | 0.28  |
| 9  | 17 | 0.12  | 3.22  | 3.49  | 17.31 | 0.46  |
| 9  | 18 | 8.23  | 0.00  | 0.79  | 1.96  | 0.09  |
| 9  | 19 | 9.85  | 1.01  | 1.72  | 0.95  | 0.41  |
| 9  | 20 | 0.00  | 0.00  | 1.31  | 0.29  | 0.59  |
| 9  | 21 | 4.48  | 0.00  | 0.00  | 0.12  | 0.06  |
| 9  | 22 | 0.23  | 0.62  | 0.68  | 0.81  | 0.44  |
| 9  | 23 | 17.16 | 1.05  | 13.15 | 4.66  | 0.20  |
| 9  | 24 | 0.00  | 2.18  | 15.49 | 0.57  | 1.40  |
| 9  | 25 | 0.48  | 2.59  | 13.70 | 0.14  | 0.10  |
| 9  | 26 | 0.11  | 0.16  | 0.00  | 0.00  | 0.22  |
| 9  | 27 | 0.25  | 0.00  | 15.98 | 0.13  | 0.43  |
| 9  | 28 | 2.67  | 0.00  | 3.44  | 0.17  | 0.49  |
| 9  | 29 | 0.54  | 0.17  | 0.63  | 0.21  | 0.36  |
| 9  | 30 | 0.00  | 0.82  | 0.73  | 0.08  | 0.07  |
| 10 | 10 | 0.00  | 0.00  | 0.00  | 0.00  | 0.00  |
| 10 | 11 | 5.45  | 0.58  | 0.00  | 11.40 | 0.00  |
| 10 | 12 | 10.26 | 7.43  | 35.49 | 0.00  | 0.00  |
| 10 | 13 | 0.00  | 16.49 | 15.70 | 3.71  | 11.57 |
| 10 | 14 | 6.54  | 2.60  | 1.44  | 10.19 | 0.00  |
| 10 | 15 | 10.82 | 10.73 | 0.22  | 0.95  | 9.37  |
| 10 | 16 | 5.90  | 0.97  | 0.22  | 0.28  | 0.22  |
| 10 | 17 | 0.06  | 0.00  | 11.96 | 4.53  | 0.93  |
| 10 | 18 | 11.40 | 32.40 | 0.57  | 16.76 | 0.86  |
| 10 | 19 | 21.12 | 0.00  | 0.62  | 8.56  | 2.51  |
| 10 | 20 | 0.00  | 8.54  | 0.84  | 1.80  | 0.05  |
| 10 | 21 | 0.84  | 1.17  | 0.00  | 0.29  | 0.44  |
| 10 | 22 | 0.77  | 0.57  | 1.40  | 1.69  | 0.04  |
| 10 | 23 | 0.65  | 0.50  | 0.62  | 6.07  | 0.00  |
| 10 | 24 | 0.00  | 0.17  | 13.33 | 0.57  | 0.00  |
| 10 | 25 | 1.06  | 0.18  | 2.80  | 0.25  | 0.00  |
| 10 | 26 | 0.25  | 1.44  | 0.00  | 0.00  | 0.00  |
| 10 | 27 | 0.19  | 0.38  | 1.55  | 0.51  | 1.46  |
| 10 | 28 | 2.09  | 0.07  | 0.19  | 0.97  | 0.05  |
| 10 | 29 | 0.59  | 0.24  | 0.20  | 1.93  | 2.42  |
| 10 | 30 | 0.00  | 0.82  | 0.73  | 0.48  | 0.15  |
| 11 | 11 | 0.00  | 0.00  | 0.00  | 0.00  | 0.00  |
| 11 | 12 | 12.09 | 14.32 | 0.00  | 0.00  | 5.22  |
| 11 | 13 | 0.00  | 8.13  | 0.00  | 35.28 | 0.00  |
| 11 | 14 | 5.77  | 14.86 | 0.00  | 1.35  | 5.26  |
| 11 | 15 | 8.50  | 1.26  | 0.83  | 1.22  | 0.00  |

|    |    |       |       |       |       |       |
|----|----|-------|-------|-------|-------|-------|
| 11 | 16 | 5.91  | 11.73 | 3.23  | 0.34  | 1.49  |
| 11 | 17 | 0.02  | 0.06  | 0.00  | 11.47 | 0.82  |
| 11 | 18 | 9.10  | 0.28  | 0.00  | 17.92 | 0.97  |
| 11 | 19 | 22.22 | 0.16  | 0.44  | 8.80  | 0.00  |
| 11 | 20 | 0.00  | 6.96  | 0.00  | 2.14  | 2.77  |
| 11 | 21 | 8.72  | 1.54  | 2.92  | 0.33  | 0.34  |
| 11 | 22 | 1.24  | 0.47  | 0.00  | 1.53  | 0.00  |
| 11 | 23 | 3.53  | 0.73  | 1.69  | 2.99  | 0.00  |
| 11 | 24 | 0.00  | 0.92  | 1.30  | 0.27  | 0.42  |
| 11 | 25 | 0.69  | 0.42  | 0.79  | 0.12  | 0.49  |
| 11 | 26 | 0.21  | 0.30  | 0.46  | 0.00  | 0.00  |
| 11 | 27 | 0.07  | 0.00  | 1.44  | 0.78  | 0.29  |
| 11 | 28 | 0.81  | 0.00  | 0.62  | 1.23  | 0.00  |
| 11 | 29 | 0.17  | 0.04  | 0.28  | 2.28  | 0.00  |
| 11 | 30 | 0.00  | 0.26  | 0.00  | 0.61  | 0.00  |
| 12 | 12 | 0.00  | 0.00  | 0.00  | 0.00  | 0.00  |
| 12 | 13 | 0.00  | 17.22 | 34.70 | 0.00  | 0.00  |
| 12 | 14 | 28.48 | 20.27 | 0.26  | 0.00  | 11.80 |
| 12 | 15 | 6.37  | 7.38  | 1.32  | 0.60  | 0.03  |
| 12 | 16 | 6.82  | 12.64 | 0.68  | 3.92  | 0.18  |
| 12 | 17 | 0.01  | 0.00  | 0.58  | 0.00  | 0.11  |
| 12 | 18 | 10.79 | 11.66 | 1.14  | 0.00  | 0.19  |
| 12 | 19 | 14.54 | 0.00  | 2.31  | 0.00  | 0.00  |
| 12 | 20 | 0.00  | 11.49 | 0.31  | 0.00  | 0.00  |
| 12 | 21 | 1.89  | 1.34  | 0.00  | 2.84  | 0.50  |
| 12 | 22 | 2.43  | 0.55  | 0.30  | 1.77  | 3.87  |
| 12 | 23 | 12.94 | 0.48  | 0.37  | 0.16  | 1.85  |
| 12 | 24 | 0.00  | 0.16  | 0.67  | 0.00  | 2.45  |
| 12 | 25 | 1.42  | 0.17  | 0.65  | 0.12  | 0.00  |
| 12 | 26 | 0.45  | 1.34  | 0.00  | 0.25  | 0.00  |
| 12 | 27 | 0.08  | 1.66  | 0.52  | 0.55  | 0.04  |
| 12 | 28 | 0.84  | 0.09  | 0.08  | 1.41  | 0.00  |
| 12 | 29 | 0.19  | 0.52  | 0.34  | 0.81  | 0.00  |
| 12 | 30 | 0.00  | 1.19  | 0.23  | 1.98  | 0.52  |
| 13 | 13 | 0.00  | 0.00  | 0.00  | 0.00  | 0.00  |
| 13 | 14 | 0.00  | 12.96 | 0.92  | 36.39 | 0.00  |
| 13 | 15 | 0.00  | 3.59  | 0.47  | 0.65  | 1.27  |
| 13 | 16 | 0.00  | 8.92  | 0.21  | 0.18  | 0.00  |
| 13 | 17 | 0.00  | 0.32  | 15.96 | 7.53  | 0.77  |
| 13 | 18 | 0.00  | 7.14  | 1.22  | 4.53  | 0.52  |
| 13 | 19 | 0.00  | 0.79  | 0.62  | 3.42  | 2.65  |
| 13 | 20 | 3.58  | 11.52 | 1.77  | 1.12  | 0.00  |
| 13 | 21 | 0.00  | 0.69  | 0.00  | 0.19  | 0.10  |
| 13 | 22 | 0.00  | 0.63  | 0.89  | 4.19  | 0.62  |

|    |    |       |       |       |       |       |
|----|----|-------|-------|-------|-------|-------|
| 13 | 23 | 0.00  | 1.04  | 1.74  | 18.35 | 0.17  |
| 13 | 24 | 1.95  | 1.23  | 13.26 | 0.10  | 0.00  |
| 13 | 25 | 0.10  | 0.61  | 4.16  | 0.20  | 0.00  |
| 13 | 26 | 0.34  | 1.09  | 0.00  | 0.00  | 1.38  |
| 13 | 27 | 2.68  | 0.18  | 1.71  | 0.23  | 0.00  |
| 13 | 28 | 0.34  | 0.00  | 0.34  | 0.61  | 1.09  |
| 13 | 29 | 0.48  | 0.13  | 0.31  | 1.31  | 0.17  |
| 13 | 30 | 1.14  | 0.21  | 0.73  | 0.34  | 0.00  |
| 14 | 14 | 0.00  | 0.00  | 0.00  | 0.00  | 0.00  |
| 14 | 15 | 12.27 | 12.03 | 0.15  | 0.05  | 0.00  |
| 14 | 16 | 17.65 | 14.55 | 0.00  | 0.00  | 0.00  |
| 14 | 17 | 0.12  | 0.04  | 0.00  | 0.73  | 0.00  |
| 14 | 18 | 7.36  | 16.53 | 2.91  | 2.11  | 0.00  |
| 14 | 19 | 4.74  | 0.10  | 0.14  | 1.71  | 0.00  |
| 14 | 20 | 0.00  | 9.58  | 0.00  | 0.05  | 0.03  |
| 14 | 21 | 1.47  | 2.19  | 0.00  | 0.00  | 0.27  |
| 14 | 22 | 1.50  | 0.35  | 0.49  | 0.04  | 0.05  |
| 14 | 23 | 6.57  | 0.19  | 0.52  | 0.00  | 0.00  |
| 14 | 24 | 0.00  | 0.15  | 0.49  | 0.46  | 3.94  |
| 14 | 25 | 0.38  | 0.19  | 0.80  | 0.37  | 0.00  |
| 14 | 26 | 0.14  | 1.80  | 0.00  | 0.00  | 0.00  |
| 14 | 27 | 0.11  | 0.22  | 1.58  | 0.49  | 0.04  |
| 14 | 28 | 0.53  | 0.16  | 1.63  | 0.82  | 3.80  |
| 14 | 29 | 0.67  | 0.14  | 3.34  | 3.92  | 0.00  |
| 14 | 30 | 0.00  | 0.39  | 0.14  | 1.14  | 0.09  |
| 15 | 15 | 0.00  | 0.00  | 0.00  | 0.00  | 0.00  |
| 15 | 16 | 3.54  | 15.00 | 1.79  | 12.26 | 14.33 |
| 15 | 17 | 0.02  | 0.05  | 5.76  | 3.05  | 8.44  |
| 15 | 18 | 17.14 | 6.64  | 0.08  | 0.49  | 15.13 |
| 15 | 19 | 4.57  | 0.10  | 5.85  | 0.25  | 0.20  |
| 15 | 20 | 0.00  | 11.27 | 0.00  | 7.30  | 0.31  |
| 15 | 21 | 1.24  | 3.94  | 1.30  | 1.35  | 2.38  |
| 15 | 22 | 1.66  | 0.05  | 0.00  | 3.86  | 0.56  |
| 15 | 23 | 7.82  | 0.79  | 0.54  | 0.75  | 0.08  |
| 15 | 24 | 0.00  | 0.87  | 1.48  | 0.00  | 0.00  |
| 15 | 25 | 0.49  | 0.99  | 4.92  | 12.27 | 0.00  |
| 15 | 26 | 0.27  | 7.97  | 0.34  | 0.11  | 1.12  |
| 15 | 27 | 0.10  | 1.05  | 8.14  | 5.51  | 2.33  |
| 15 | 28 | 0.73  | 0.04  | 1.39  | 13.65 | 0.00  |
| 15 | 29 | 0.15  | 0.23  | 2.75  | 9.11  | 0.00  |
| 15 | 30 | 0.00  | 0.26  | 6.02  | 13.60 | 0.96  |
| 16 | 16 | 0.00  | 0.00  | 0.00  | 0.00  | 0.00  |
| 16 | 17 | 0.10  | 0.00  | 20.17 | 0.22  | 20.68 |
| 16 | 18 | 29.84 | 13.21 | 0.00  | 0.00  | 6.26  |

|    |    |       |       |       |       |       |
|----|----|-------|-------|-------|-------|-------|
| 16 | 19 | 17.47 | 0.00  | 4.97  | 0.00  | 0.00  |
| 16 | 20 | 0.00  | 17.37 | 0.00  | 26.02 | 7.85  |
| 16 | 21 | 0.88  | 3.04  | 5.05  | 0.88  | 6.97  |
| 16 | 22 | 0.72  | 0.21  | 0.00  | 0.53  | 1.71  |
| 16 | 23 | 0.16  | 0.18  | 3.78  | 0.07  | 0.41  |
| 16 | 24 | 0.00  | 0.06  | 2.77  | 0.00  | 0.98  |
| 16 | 25 | 0.11  | 0.06  | 0.92  | 0.92  | 2.68  |
| 16 | 26 | 0.19  | 0.48  | 1.31  | 0.71  | 0.00  |
| 16 | 27 | 0.17  | 0.00  | 3.11  | 0.65  | 0.92  |
| 16 | 28 | 0.52  | 0.09  | 5.65  | 1.12  | 0.00  |
| 16 | 29 | 0.55  | 0.07  | 0.94  | 1.59  | 0.00  |
| 16 | 30 | 0.00  | 0.32  | 0.06  | 4.10  | 2.79  |
| 17 | 17 | 0.00  | 0.00  | 0.00  | 0.00  | 0.00  |
| 17 | 18 | 0.00  | 0.00  | 0.00  | 19.26 | 17.91 |
| 17 | 19 | 0.02  | 6.68  | 29.35 | 7.02  | 0.11  |
| 17 | 20 | 0.00  | 0.00  | 0.00  | 1.53  | 5.23  |
| 17 | 21 | 0.00  | 0.00  | 0.00  | 0.53  | 2.94  |
| 17 | 22 | 0.00  | 10.60 | 0.00  | 39.96 | 1.01  |
| 17 | 23 | 0.00  | 2.86  | 1.83  | 11.37 | 0.24  |
| 17 | 24 | 0.00  | 1.19  | 7.48  | 0.00  | 0.54  |
| 17 | 25 | 1.71  | 6.01  | 2.82  | 0.89  | 1.48  |
| 17 | 26 | 5.92  | 0.10  | 0.00  | 0.00  | 7.95  |
| 17 | 27 | 8.25  | 0.00  | 5.91  | 0.69  | 0.54  |
| 17 | 28 | 5.55  | 0.46  | 4.08  | 1.00  | 0.05  |
| 17 | 29 | 8.13  | 11.54 | 0.80  | 1.87  | 0.37  |
| 17 | 30 | 0.00  | 0.06  | 6.65  | 0.66  | 1.52  |
| 18 | 18 | 0.00  | 0.00  | 0.00  | 0.00  | 0.00  |
| 18 | 19 | 20.75 | 0.00  | 0.07  | 20.85 | 0.07  |
| 18 | 20 | 0.00  | 24.66 | 2.59  | 0.62  | 6.42  |
| 18 | 21 | 2.65  | 0.00  | 0.00  | 0.07  | 5.54  |
| 18 | 22 | 1.93  | 0.17  | 0.00  | 10.02 | 1.80  |
| 18 | 23 | 1.45  | 0.10  | 0.36  | 7.79  | 0.43  |
| 18 | 24 | 0.00  | 0.09  | 0.34  | 0.00  | 0.64  |
| 18 | 25 | 0.00  | 0.09  | 0.62  | 0.17  | 1.74  |
| 18 | 26 | 0.08  | 0.75  | 0.00  | 0.00  | 5.34  |
| 18 | 27 | 0.14  | 0.16  | 1.16  | 0.29  | 0.97  |
| 18 | 28 | 1.23  | 1.04  | 1.03  | 0.50  | 0.03  |
| 18 | 29 | 0.30  | 0.05  | 2.29  | 1.97  | 0.25  |
| 18 | 30 | 0.00  | 0.33  | 0.07  | 0.65  | 3.04  |
| 19 | 19 | 0.00  | 0.00  | 0.00  | 0.00  | 0.00  |
| 19 | 20 | 0.00  | 0.00  | 0.00  | 0.32  | 0.00  |
| 19 | 21 | 0.87  | 0.04  | 0.66  | 0.03  | 0.05  |
| 19 | 22 | 0.55  | 18.16 | 0.00  | 5.08  | 0.32  |
| 19 | 23 | 3.40  | 15.27 | 5.60  | 3.95  | 0.99  |

|    |    |       |       |       |       |       |
|----|----|-------|-------|-------|-------|-------|
| 19 | 24 | 0.00  | 21.30 | 0.73  | 0.00  | 0.00  |
| 19 | 25 | 0.12  | 8.45  | 15.49 | 0.08  | 0.00  |
| 19 | 26 | 0.07  | 7.06  | 0.17  | 0.00  | 0.65  |
| 19 | 27 | 0.09  | 0.00  | 6.68  | 0.11  | 0.00  |
| 19 | 28 | 0.97  | 1.35  | 8.31  | 0.23  | 0.52  |
| 19 | 29 | 0.14  | 3.16  | 18.29 | 1.28  | 0.25  |
| 19 | 30 | 0.00  | 6.93  | 5.05  | 0.29  | 0.00  |
| 20 | 20 | 0.00  | 0.00  | 0.00  | 0.00  | 0.00  |
| 20 | 21 | 0.00  | 0.27  | 0.00  | 0.39  | 3.54  |
| 20 | 22 | 0.00  | 0.33  | 0.00  | 7.15  | 3.86  |
| 20 | 23 | 0.00  | 0.19  | 0.00  | 0.60  | 0.00  |
| 20 | 24 | 5.28  | 0.38  | 0.00  | 0.00  | 0.00  |
| 20 | 25 | 0.00  | 0.40  | 0.00  | 15.43 | 3.80  |
| 20 | 26 | 0.00  | 3.20  | 0.00  | 0.00  | 0.00  |
| 20 | 27 | 6.86  | 0.08  | 0.00  | 5.61  | 0.31  |
| 20 | 28 | 0.98  | 0.12  | 0.00  | 16.30 | 0.17  |
| 20 | 29 | 1.32  | 0.52  | 0.00  | 9.88  | 0.00  |
| 20 | 30 | 1.29  | 0.89  | 0.00  | 13.92 | 7.65  |
| 21 | 21 | 0.00  | 0.00  | 0.00  | 0.00  | 0.00  |
| 21 | 22 | 30.91 | 0.00  | 0.00  | 18.59 | 2.60  |
| 21 | 23 | 13.04 | 0.95  | 6.68  | 39.66 | 1.52  |
| 21 | 24 | 0.00  | 1.06  | 25.98 | 0.00  | 0.00  |
| 21 | 25 | 1.91  | 1.01  | 7.05  | 14.53 | 0.47  |
| 21 | 26 | 0.62  | 8.05  | 17.57 | 2.94  | 0.31  |
| 21 | 27 | 0.31  | 0.00  | 0.00  | 4.35  | 2.45  |
| 21 | 28 | 2.83  | 0.00  | 5.84  | 5.34  | 1.70  |
| 21 | 29 | 0.50  | 0.14  | 0.00  | 1.38  | 0.00  |
| 21 | 30 | 0.00  | 0.03  | 0.00  | 20.18 | 3.60  |
| 22 | 22 | 0.00  | 0.00  | 0.00  | 0.00  | 0.00  |
| 22 | 23 | 27.08 | 15.14 | 0.00  | 7.46  | 9.04  |
| 22 | 24 | 0.00  | 7.93  | 0.00  | 0.00  | 0.00  |
| 22 | 25 | 2.69  | 5.83  | 0.00  | 7.08  | 0.00  |
| 22 | 26 | 0.88  | 17.09 | 0.00  | 1.53  | 0.00  |
| 22 | 27 | 0.48  | 0.00  | 0.00  | 19.43 | 0.43  |
| 22 | 28 | 4.31  | 4.18  | 0.00  | 10.25 | 10.89 |
| 22 | 29 | 0.77  | 6.49  | 0.00  | 6.58  | 0.00  |
| 22 | 30 | 0.00  | 2.03  | 0.00  | 22.27 | 11.36 |
| 23 | 23 | 0.00  | 0.00  | 0.00  | 0.00  | 0.00  |
| 23 | 24 | 0.00  | 13.24 | 19.57 | 0.00  | 0.00  |
| 23 | 25 | 0.22  | 16.92 | 10.47 | 6.44  | 0.00  |
| 23 | 26 | 0.07  | 1.91  | 1.11  | 0.00  | 0.00  |
| 23 | 27 | 0.01  | 0.00  | 5.61  | 0.90  | 0.00  |
| 23 | 28 | 0.06  | 2.56  | 8.25  | 7.42  | 0.00  |
| 23 | 29 | 0.01  | 3.60  | 12.26 | 2.92  | 0.00  |

|    |    |       |       |       |       |      |
|----|----|-------|-------|-------|-------|------|
| 23 | 30 | 0.00  | 2.86  | 1.83  | 13.07 | 1.02 |
| 24 | 24 | 0.00  | 0.00  | 0.00  | 0.00  | 0.00 |
| 24 | 25 | 0.00  | 9.63  | 14.78 | 0.00  | 0.00 |
| 24 | 26 | 0.00  | 2.39  | 9.57  | 0.00  | 0.00 |
| 24 | 27 | 4.62  | 0.00  | 21.42 | 0.00  | 0.00 |
| 24 | 28 | 0.71  | 0.00  | 8.98  | 0.00  | 0.00 |
| 24 | 29 | 0.95  | 0.41  | 25.28 | 0.00  | 0.00 |
| 24 | 30 | 8.17  | 2.76  | 4.10  | 0.00  | 0.00 |
| 25 | 25 | 0.00  | 0.00  | 0.00  | 0.00  | 0.00 |
| 25 | 26 | 18.47 | 17.43 | 43.07 | 0.00  | 0.00 |
| 25 | 27 | 0.00  | 0.00  | 5.74  | 7.81  | 0.00 |
| 25 | 28 | 0.00  | 0.00  | 10.13 | 11.31 | 0.00 |
| 25 | 29 | 17.83 | 0.27  | 7.39  | 6.16  | 0.00 |
| 25 | 30 | 0.00  | 1.26  | 9.86  | 32.72 | 0.00 |
| 26 | 26 | 0.00  | 0.00  | 0.00  | 0.00  | 0.00 |
| 26 | 27 | 10.45 | 0.00  | 0.00  | 0.00  | 0.00 |
| 26 | 28 | 7.03  | 0.00  | 16.67 | 0.92  | 0.20 |
| 26 | 29 | 10.70 | 0.67  | 0.00  | 1.12  | 0.00 |
| 26 | 30 | 0.00  | 1.03  | 0.00  | 2.77  | 0.91 |
| 27 | 27 | 0.00  | 0.00  | 0.00  | 0.00  | 0.00 |
| 27 | 28 | 2.95  | 0.00  | 2.84  | 19.07 | 0.00 |
| 27 | 29 | 14.44 | 0.00  | 10.90 | 12.00 | 0.00 |
| 27 | 30 | 5.16  | 0.00  | 12.02 | 5.68  | 0.85 |
| 28 | 28 | 0.00  | 0.00  | 0.00  | 0.00  | 0.00 |
| 28 | 29 | 11.78 | 4.47  | 8.27  | 15.56 | 0.00 |
| 28 | 30 | 12.70 | 0.97  | 4.99  | 14.26 | 1.55 |
| 29 | 29 | 0.00  | 0.00  | 0.00  | 0.00  | 0.00 |
| 29 | 30 | 17.06 | 3.22  | 0.71  | 10.48 | 0.00 |
| 30 | 30 | 0.00  | 0.00  | 0.00  | 0.00  | 0.00 |

174 **Table S3.** The original SOC elements between  $T_i$  and  $S_j$  calculated at M06L/def2-svp level.

| States |       | SOC elements between $T_i$ and $S_j$ /cm <sup>-1</sup> |             |             |             |             |
|--------|-------|--------------------------------------------------------|-------------|-------------|-------------|-------------|
| $T_i$  | $S_j$ | Conformer 1                                            | Conformer 2 | Conformer 3 | Conformer 4 | Conformer 5 |
| 1      | 0     | 18.78                                                  | 14.55       | 10.23       | 7.31        | 13.62       |
| 1      | 1     | 1.50                                                   | 0.27        | 0.31        | 0.63        | 0.39        |
| 1      | 2     | 1.55                                                   | 0.58        | 0.71        | 1.13        | 7.28        |
| 1      | 3     | 4.58                                                   | 0.64        | 78.38       | 395.62      | 1.42        |
| 1      | 4     | 642.53                                                 | 675.49      | 676.77      | 563.40      | 2.23        |
| 1      | 5     | 5.84                                                   | 70.40       | 4.31        | 11.58       | 9.45        |
| 1      | 6     | 22.65                                                  | 5.99        | 2.10        | 24.39       | 671.42      |
| 1      | 7     | 689.33                                                 | 5.34        | 2.23        | 11.29       | 0.84        |
| 1      | 8     | 373.85                                                 | 86.56       | 34.68       | 113.26      | 1.41        |
| 1      | 9     | 4.34                                                   | 22.25       | 3.12        | 20.33       | 9.00        |

|   |    |        |        |        |        |        |
|---|----|--------|--------|--------|--------|--------|
| 1 | 10 | 44.79  | 84.26  | 753.12 | 742.48 | 41.65  |
| 1 | 11 | 11.23  | 138.31 | 0.98   | 1.84   | 3.83   |
| 1 | 12 | 6.66   | 727.82 | 0.51   | 1.85   | 6.90   |
| 1 | 13 | 8.20   | 76.99  | 1.28   | 1.98   | 62.99  |
| 1 | 14 | 8.11   | 9.01   | 4.26   | 3.59   | 743.31 |
| 1 | 15 | 9.46   | 17.64  | 1.52   | 2.48   | 2.06   |
| 1 | 16 | 18.29  | 1.96   | 3.93   | 2.08   | 8.16   |
| 1 | 17 | 122.84 | 2.87   | 14.48  | 3.26   | 0.70   |
| 1 | 18 | 2.23   | 0.35   | 130.61 | 14.29  | 9.11   |
| 1 | 19 | 8.76   | 2.97   | 1.76   | 8.57   | 0.78   |
| 1 | 20 | 1.59   | 1.10   | 2.12   | 114.45 | 0.56   |
| 1 | 21 | 352.99 | 2.08   | 1.11   | 2.45   | 2.45   |
| 1 | 22 | 250.03 | 43.72  | 11.36  | 0.49   | 5.42   |
| 1 | 23 | 10.82  | 138.09 | 2.20   | 0.30   | 9.17   |
| 1 | 24 | 5.56   | 3.18   | 1.90   | 2.53   | 36.29  |
| 1 | 25 | 1.66   | 1.61   | 2.13   | 2.64   | 7.69   |
| 1 | 26 | 11.76  | 5.07   | 3.04   | 1.16   | 5.19   |
| 1 | 27 | 37.07  | 0.77   | 2.64   | 2.13   | 90.87  |
| 1 | 28 | 24.39  | 3.54   | 135.52 | 17.29  | 76.90  |
| 1 | 29 | 127.50 | 1.10   | 156.05 | 9.87   | 8.36   |
| 1 | 30 | 19.62  | 39.43  | 83.79  | 246.02 | 0.52   |
| 2 | 0  | 40.28  | 33.67  | 7.30   | 7.74   | 1.43   |
| 2 | 1  | 2.57   | 0.88   | 1.00   | 0.43   | 6.30   |
| 2 | 2  | 2.92   | 1.15   | 0.09   | 0.35   | 0.09   |
| 2 | 3  | 4.59   | 0.40   | 0.62   | 2.19   | 0.31   |
| 2 | 4  | 3.96   | 1.68   | 1.33   | 0.55   | 0.98   |
| 2 | 5  | 643.29 | 3.66   | 1.63   | 2.92   | 0.28   |
| 2 | 6  | 11.22  | 10.25  | 17.52  | 405.48 | 36.23  |
| 2 | 7  | 5.08   | 676.26 | 84.59  | 129.47 | 2.64   |
| 2 | 8  | 12.89  | 35.17  | 37.02  | 151.64 | 2.72   |
| 2 | 9  | 7.36   | 46.24  | 674.98 | 525.23 | 0.67   |
| 2 | 10 | 98.48  | 32.63  | 2.17   | 7.21   | 3.41   |
| 2 | 11 | 761.61 | 10.38  | 11.80  | 4.71   | 2.04   |
| 2 | 12 | 40.18  | 7.10   | 19.69  | 19.46  | 3.32   |
| 2 | 13 | 129.06 | 16.92  | 751.82 | 741.97 | 3.36   |
| 2 | 14 | 37.75  | 35.21  | 28.85  | 52.16  | 41.50  |
| 2 | 15 | 61.22  | 25.58  | 1.38   | 74.51  | 0.04   |
| 2 | 16 | 2.11   | 16.40  | 43.25  | 2.70   | 0.62   |
| 2 | 17 | 4.33   | 751.35 | 4.67   | 4.72   | 0.09   |
| 2 | 18 | 6.21   | 1.24   | 1.53   | 6.02   | 0.58   |
| 2 | 19 | 7.92   | 2.19   | 2.51   | 2.77   | 1.97   |
| 2 | 20 | 1.15   | 9.17   | 1.04   | 1.49   | 0.10   |
| 2 | 21 | 4.24   | 4.09   | 1.00   | 1.37   | 3.42   |
| 2 | 22 | 3.56   | 16.95  | 5.56   | 0.04   | 0.20   |

|   |    |        |        |        |        |        |
|---|----|--------|--------|--------|--------|--------|
| 2 | 23 | 109.76 | 4.47   | 3.29   | 0.27   | 1.50   |
| 2 | 24 | 18.17  | 4.66   | 0.80   | 2.25   | 2.00   |
| 2 | 25 | 14.37  | 9.19   | 1.97   | 7.66   | 0.70   |
| 2 | 26 | 114.13 | 8.71   | 6.00   | 13.83  | 0.35   |
| 2 | 27 | 84.83  | 2.36   | 10.36  | 2.52   | 4.60   |
| 2 | 28 | 77.32  | 28.86  | 59.41  | 3.56   | 4.00   |
| 2 | 29 | 34.03  | 15.62  | 98.53  | 1.15   | 1.22   |
| 2 | 30 | 15.88  | 15.71  | 41.76  | 2.30   | 0.19   |
| 3 | 0  | 15.84  | 38.57  | 10.16  | 2.60   | 34.59  |
| 3 | 1  | 1.77   | 1.52   | 57.45  | 320.73 | 0.88   |
| 3 | 2  | 0.86   | 1.13   | 0.97   | 3.38   | 0.24   |
| 3 | 3  | 3.00   | 0.48   | 2.54   | 8.39   | 0.67   |
| 3 | 4  | 4.37   | 0.73   | 63.69  | 85.51  | 8.17   |
| 3 | 5  | 12.33  | 1.72   | 3.45   | 14.52  | 10.13  |
| 3 | 6  | 641.80 | 5.92   | 1.78   | 10.61  | 0.42   |
| 3 | 7  | 31.71  | 8.10   | 0.36   | 4.32   | 3.83   |
| 3 | 8  | 25.37  | 5.07   | 4.02   | 49.38  | 3.96   |
| 3 | 9  | 7.02   | 76.65  | 4.57   | 9.69   | 14.14  |
| 3 | 10 | 34.36  | 32.75  | 99.20  | 330.77 | 5.88   |
| 3 | 11 | 0.41   | 657.19 | 8.26   | 5.32   | 4.45   |
| 3 | 12 | 707.04 | 110.35 | 4.74   | 8.90   | 669.16 |
| 3 | 13 | 82.33  | 69.12  | 6.39   | 4.19   | 33.93  |
| 3 | 14 | 24.73  | 9.17   | 38.90  | 22.30  | 2.86   |
| 3 | 15 | 321.52 | 57.99  | 1.13   | 0.76   | 1.44   |
| 3 | 16 | 12.57  | 5.60   | 0.39   | 1.15   | 26.34  |
| 3 | 17 | 4.11   | 11.05  | 3.03   | 2.94   | 5.95   |
| 3 | 18 | 2.22   | 7.42   | 13.04  | 4.88   | 11.96  |
| 3 | 19 | 3.68   | 187.09 | 5.54   | 5.08   | 14.43  |
| 3 | 20 | 1.05   | 725.10 | 1.81   | 34.50  | 6.31   |
| 3 | 21 | 2.58   | 20.62  | 0.67   | 0.95   | 729.75 |
| 3 | 32 | 2.48   | 2.86   | 2.35   | 0.36   | 36.94  |
| 3 | 23 | 32.95  | 8.80   | 4.93   | 0.71   | 124.09 |
| 3 | 24 | 5.04   | 4.05   | 4.29   | 4.41   | 51.38  |
| 3 | 25 | 2.30   | 9.03   | 4.60   | 20.62  | 1.98   |
| 3 | 26 | 80.57  | 36.65  | 39.12  | 9.36   | 8.87   |
| 3 | 27 | 65.63  | 2.94   | 1.01   | 1.90   | 17.17  |
| 3 | 28 | 38.25  | 25.57  | 4.98   | 9.77   | 2.13   |
| 3 | 29 | 17.38  | 17.22  | 9.26   | 4.20   | 22.58  |
| 3 | 30 | 95.12  | 48.34  | 7.42   | 63.44  | 4.61   |
| 4 | 0  | 23.06  | 8.44   | 304.22 | 350.42 | 390.23 |
| 4 | 1  | 639.73 | 35.10  | 3.76   | 23.49  | 7.40   |
| 4 | 2  | 5.62   | 0.56   | 1.19   | 4.93   | 0.09   |
| 4 | 3  | 10.47  | 3.81   | 1.40   | 3.47   | 9.78   |
| 4 | 4  | 1.74   | 18.31  | 2.60   | 0.93   | 4.46   |



|   |    |        |        |        |        |        |
|---|----|--------|--------|--------|--------|--------|
| 4 | 5  | 4.81   | 1.94   | 12.15  | 18.82  | 77.23  |
| 4 | 6  | 21.06  | 3.62   | 70.42  | 36.60  | 1.43   |
| 4 | 7  | 616.05 | 1.15   | 14.55  | 126.52 | 34.28  |
| 4 | 8  | 311.60 | 3.62   | 1.39   | 4.46   | 46.51  |
| 4 | 9  | 1.82   | 1.77   | 7.93   | 3.19   | 131.34 |
| 4 | 10 | 17.44  | 4.39   | 5.42   | 21.21  | 17.28  |
| 4 | 11 | 6.89   | 19.18  | 153.21 | 111.19 | 12.32  |
| 4 | 12 | 4.42   | 38.14  | 66.78  | 277.43 | 31.48  |
| 4 | 13 | 1.26   | 3.93   | 28.49  | 3.44   | 4.40   |
| 4 | 14 | 7.93   | 0.85   | 529.50 | 73.56  | 15.19  |
| 4 | 15 | 5.60   | 1.01   | 74.88  | 3.72   | 104.88 |
| 4 | 16 | 4.26   | 5.34   | 5.51   | 214.36 | 543.56 |
| 4 | 17 | 58.59  | 1.35   | 84.14  | 20.25  | 33.98  |
| 4 | 18 | 1.09   | 1.75   | 8.03   | 394.45 | 310.96 |
| 4 | 19 | 4.83   | 10.48  | 346.55 | 392.97 | 27.84  |
| 4 | 20 | 1.44   | 16.70  | 48.01  | 18.43  | 26.90  |
| 4 | 21 | 52.69  | 16.89  | 15.46  | 60.64  | 3.52   |
| 4 | 42 | 37.05  | 1.80   | 7.42   | 10.50  | 220.59 |
| 4 | 23 | 4.03   | 8.27   | 67.34  | 135.54 | 125.32 |
| 4 | 24 | 2.78   | 2.32   | 34.14  | 52.89  | 16.48  |
| 4 | 25 | 0.71   | 2.53   | 71.04  | 25.27  | 59.51  |
| 4 | 26 | 7.47   | 1.32   | 581.93 | 13.26  | 45.69  |
| 4 | 27 | 26.17  | 1.13   | 22.77  | 142.12 | 16.61  |
| 4 | 28 | 18.85  | 1.21   | 38.83  | 58.24  | 21.85  |
| 4 | 29 | 145.67 | 1.07   | 7.59   | 18.14  | 31.79  |
| 4 | 30 | 16.31  | 1.78   | 95.40  | 18.54  | 9.18   |
| 5 | 0  | 35.28  | 319.09 | 245.45 | 82.07  | 0.74   |
| 5 | 1  | 7.38   | 2.81   | 126.73 | 144.40 | 3.04   |
| 5 | 2  | 625.18 | 6.47   | 2.90   | 6.25   | 1.09   |
| 5 | 3  | 11.72  | 3.98   | 11.08  | 17.93  | 1.72   |
| 5 | 4  | 1.24   | 1.74   | 2.17   | 10.27  | 0.18   |
| 5 | 5  | 15.68  | 0.68   | 7.59   | 15.24  | 0.11   |
| 5 | 6  | 1.37   | 135.83 | 78.92  | 7.38   | 8.11   |
| 5 | 7  | 3.36   | 8.40   | 16.94  | 11.52  | 0.57   |
| 5 | 8  | 11.97  | 0.53   | 4.50   | 20.00  | 0.90   |
| 5 | 9  | 10.05  | 69.89  | 4.50   | 3.59   | 0.33   |
| 5 | 10 | 83.37  | 0.44   | 135.50 | 156.27 | 0.48   |
| 5 | 11 | 660.98 | 9.28   | 54.93  | 97.68  | 0.33   |
| 5 | 12 | 51.30  | 5.21   | 32.40  | 298.47 | 10.75  |
| 5 | 13 | 71.19  | 5.66   | 12.84  | 48.81  | 1.60   |
| 5 | 14 | 27.28  | 0.84   | 363.52 | 560.52 | 7.34   |
| 5 | 15 | 42.72  | 2.63   | 192.03 | 16.37  | 0.16   |
| 5 | 16 | 1.46   | 182.55 | 1.94   | 24.90  | 0.46   |
| 5 | 17 | 3.29   | 7.99   | 67.98  | 100.13 | 1.93   |

|   |    |        |        |        |        |       |
|---|----|--------|--------|--------|--------|-------|
| 5 | 18 | 4.18   | 66.56  | 18.94  | 58.04  | 0.12  |
| 5 | 19 | 9.34   | 273.74 | 509.18 | 52.95  | 0.42  |
| 5 | 20 | 2.81   | 55.87  | 73.28  | 13.25  | 3.53  |
| 5 | 21 | 2.48   | 574.02 | 11.88  | 10.99  | 12.88 |
| 5 | 22 | 3.89   | 59.95  | 11.33  | 2.51   | 0.81  |
| 5 | 23 | 41.68  | 5.63   | 29.81  | 12.76  | 1.99  |
| 5 | 24 | 7.34   | 72.50  | 149.28 | 35.70  | 1.42  |
| 5 | 25 | 6.65   | 74.85  | 39.40  | 586.42 | 0.60  |
| 5 | 26 | 46.47  | 11.96  | 302.98 | 271.60 | 0.28  |
| 5 | 27 | 21.59  | 28.24  | 4.77   | 48.57  | 1.26  |
| 5 | 28 | 21.30  | 30.79  | 20.79  | 196.06 | 0.98  |
| 5 | 29 | 4.91   | 22.32  | 26.53  | 63.64  | 0.58  |
| 5 | 30 | 2.77   | 95.44  | 202.30 | 55.64  | 1.68  |
| 6 | 0  | 16.65  | 5.61   | 51.04  | 11.62  | 2.61  |
| 6 | 1  | 130.22 | 39.06  | 667.54 | 571.14 | 13.08 |
| 6 | 2  | 16.61  | 6.00   | 2.20   | 11.53  | 1.62  |
| 6 | 3  | 479.54 | 4.75   | 59.78  | 82.60  | 3.32  |
| 6 | 4  | 101.92 | 25.36  | 1.83   | 17.44  | 0.78  |
| 6 | 5  | 9.75   | 3.85   | 7.83   | 8.37   | 0.08  |
| 6 | 6  | 12.54  | 1.17   | 12.26  | 15.26  | 6.97  |
| 6 | 7  | 67.72  | 7.39   | 2.38   | 8.00   | 3.26  |
| 6 | 8  | 51.79  | 4.34   | 24.18  | 76.04  | 4.59  |
| 6 | 9  | 3.06   | 4.30   | 2.60   | 18.60  | 0.57  |
| 6 | 10 | 7.20   | 5.53   | 724.56 | 610.39 | 1.59  |
| 6 | 11 | 11.60  | 24.04  | 8.27   | 20.85  | 2.17  |
| 6 | 12 | 473.71 | 49.20  | 5.50   | 77.35  | 43.23 |
| 6 | 13 | 56.35  | 6.41   | 2.65   | 16.79  | 2.10  |
| 6 | 14 | 16.65  | 1.16   | 70.20  | 123.72 | 11.84 |
| 6 | 15 | 199.52 | 2.76   | 35.71  | 3.75   | 0.96  |
| 6 | 16 | 0.66   | 1.28   | 2.97   | 2.48   | 1.53  |
| 6 | 17 | 22.75  | 13.90  | 23.06  | 22.48  | 0.78  |
| 6 | 18 | 1.02   | 3.11   | 79.69  | 16.09  | 2.13  |
| 6 | 19 | 16.87  | 6.44   | 92.58  | 8.26   | 1.57  |
| 6 | 20 | 3.54   | 26.41  | 14.14  | 59.52  | 1.19  |
| 6 | 21 | 42.89  | 3.31   | 1.82   | 3.64   | 48.57 |
| 6 | 22 | 22.86  | 3.15   | 9.61   | 0.42   | 6.78  |
| 6 | 23 | 10.55  | 11.99  | 5.49   | 1.56   | 8.74  |
| 6 | 24 | 3.14   | 0.75   | 29.07  | 7.60   | 4.24  |
| 6 | 25 | 2.03   | 1.60   | 6.66   | 135.31 | 8.51  |
| 6 | 26 | 15.04  | 1.86   | 58.60  | 60.83  | 1.00  |
| 6 | 27 | 12.00  | 1.27   | 2.01   | 16.45  | 1.10  |
| 6 | 28 | 10.23  | 1.90   | 91.43  | 51.01  | 1.51  |
| 6 | 29 | 38.44  | 0.52   | 101.93 | 17.43  | 2.30  |
| 6 | 30 | 38.50  | 2.59   | 75.75  | 124.30 | 0.67  |

|   |    |        |        |       |        |        |
|---|----|--------|--------|-------|--------|--------|
| 7 | 0  | 36.90  | 1.78   | 10.10 | 4.66   | 267.61 |
| 7 | 1  | 253.72 | 79.93  | 5.06  | 44.37  | 2.84   |
| 7 | 2  | 10.86  | 22.90  | 28.19 | 56.44  | 0.26   |
| 7 | 3  | 408.31 | 4.41   | 0.65  | 5.91   | 5.25   |
| 7 | 4  | 223.26 | 8.47   | 1.47  | 1.68   | 1.28   |
| 7 | 5  | 14.05  | 1.15   | 2.98  | 2.83   | 10.59  |
| 7 | 6  | 7.99   | 0.52   | 1.34  | 6.96   | 3.12   |
| 7 | 7  | 65.77  | 9.72   | 3.17  | 1.98   | 21.82  |
| 7 | 8  | 77.07  | 9.02   | 1.75  | 4.09   | 23.58  |
| 7 | 9  | 12.62  | 1.93   | 47.54 | 21.46  | 87.80  |
| 7 | 10 | 24.49  | 8.40   | 5.79  | 47.72  | 10.02  |
| 7 | 11 | 18.53  | 20.55  | 6.10  | 3.44   | 11.34  |
| 7 | 12 | 398.38 | 83.97  | 3.27  | 11.89  | 16.07  |
| 7 | 13 | 51.55  | 9.50   | 56.28 | 54.83  | 4.61   |
| 7 | 14 | 29.46  | 1.96   | 41.98 | 21.95  | 4.20   |
| 7 | 15 | 174.48 | 1.48   | 7.18  | 5.96   | 73.58  |
| 7 | 16 | 5.75   | 0.69   | 2.83  | 1.10   | 110.92 |
| 7 | 17 | 49.75  | 33.07  | 1.84  | 3.95   | 20.24  |
| 7 | 18 | 2.25   | 3.30   | 0.58  | 3.22   | 187.73 |
| 7 | 19 | 64.22  | 4.25   | 12.44 | 2.14   | 31.75  |
| 7 | 20 | 11.37  | 15.95  | 3.05  | 4.57   | 26.96  |
| 7 | 21 | 77.62  | 0.66   | 0.27  | 0.34   | 75.92  |
| 7 | 22 | 80.51  | 3.68   | 0.69  | 0.26   | 525.33 |
| 7 | 23 | 7.27   | 12.76  | 2.45  | 0.81   | 237.39 |
| 7 | 24 | 15.39  | 1.06   | 8.86  | 1.20   | 28.38  |
| 7 | 25 | 6.16   | 0.89   | 4.55  | 21.29  | 125.25 |
| 7 | 26 | 19.00  | 1.53   | 42.24 | 10.91  | 115.65 |
| 7 | 27 | 32.15  | 1.05   | 1.47  | 1.65   | 33.27  |
| 7 | 28 | 21.47  | 2.16   | 4.65  | 7.07   | 31.52  |
| 7 | 29 | 63.53  | 1.21   | 5.80  | 2.54   | 6.80   |
| 7 | 30 | 26.25  | 3.38   | 16.03 | 11.23  | 14.03  |
| 8 | 0  | 363.04 | 14.25  | 0.78  | 3.97   | 6.24   |
| 8 | 1  | 10.61  | 672.01 | 17.64 | 142.51 | 45.25  |
| 8 | 2  | 9.11   | 6.88   | 2.50  | 80.10  | 1.68   |
| 8 | 3  | 51.16  | 2.38   | 3.36  | 28.30  | 7.48   |
| 8 | 4  | 10.53  | 2.66   | 21.91 | 7.16   | 0.74   |
| 8 | 5  | 6.51   | 19.43  | 0.88  | 7.19   | 0.74   |
| 8 | 6  | 2.79   | 0.97   | 0.12  | 4.89   | 13.58  |
| 8 | 7  | 9.61   | 5.64   | 0.17  | 1.01   | 2.39   |
| 8 | 8  | 7.62   | 70.34  | 1.56  | 21.44  | 4.19   |
| 8 | 9  | 123.65 | 24.17  | 4.62  | 25.03  | 2.42   |
| 8 | 10 | 2.51   | 78.72  | 9.30  | 150.17 | 2.80   |
| 8 | 11 | 6.14   | 133.03 | 0.17  | 6.45   | 3.07   |
| 8 | 12 | 57.17  | 693.18 | 0.32  | 23.97  | 5.22   |

|   |    |        |        |       |        |        |
|---|----|--------|--------|-------|--------|--------|
| 8 | 13 | 30.62  | 76.25  | 5.76  | 78.88  | 4.32   |
| 8 | 14 | 142.95 | 9.92   | 2.04  | 38.86  | 47.13  |
| 8 | 15 | 48.52  | 18.30  | 0.23  | 8.35   | 1.23   |
| 8 | 16 | 3.36   | 4.02   | 0.66  | 0.98   | 4.41   |
| 8 | 17 | 11.82  | 9.08   | 0.60  | 7.34   | 0.48   |
| 8 | 18 | 21.02  | 0.85   | 2.85  | 3.45   | 3.67   |
| 8 | 19 | 524.68 | 2.26   | 0.21  | 3.43   | 1.72   |
| 8 | 20 | 93.10  | 0.66   | 0.18  | 15.56  | 0.59   |
| 8 | 21 | 162.58 | 6.08   | 0.11  | 0.88   | 6.59   |
| 8 | 22 | 239.63 | 32.41  | 0.33  | 0.34   | 4.98   |
| 8 | 23 | 4.62   | 123.44 | 0.14  | 0.45   | 2.64   |
| 8 | 24 | 142.88 | 2.29   | 0.40  | 2.85   | 4.32   |
| 8 | 25 | 56.03  | 0.78   | 0.37  | 41.39  | 33.32  |
| 8 | 26 | 11.23  | 2.85   | 2.36  | 20.33  | 2.25   |
| 8 | 27 | 26.66  | 0.60   | 0.24  | 4.33   | 4.12   |
| 8 | 28 | 24.17  | 2.22   | 2.20  | 15.29  | 4.68   |
| 8 | 29 | 18.55  | 1.95   | 3.14  | 6.16   | 2.41   |
| 8 | 30 | 9.80   | 26.57  | 1.34  | 31.60  | 1.20   |
| 9 | 0  | 10.68  | 348.43 | 43.25 | 7.72   | 4.82   |
| 9 | 1  | 346.54 | 5.05   | 15.52 | 84.32  | 98.45  |
| 9 | 2  | 136.53 | 12.37  | 29.66 | 350.50 | 5.36   |
| 9 | 3  | 44.52  | 5.07   | 1.30  | 43.21  | 4.20   |
| 9 | 4  | 307.86 | 3.41   | 13.27 | 51.94  | 0.59   |
| 9 | 5  | 65.51  | 2.01   | 20.58 | 21.02  | 2.15   |
| 9 | 6  | 20.29  | 81.26  | 2.73  | 4.61   | 5.40   |
| 9 | 7  | 48.40  | 14.52  | 0.88  | 2.96   | 2.54   |
| 9 | 8  | 36.08  | 1.07   | 1.33  | 1.58   | 4.29   |
| 9 | 9  | 3.90   | 131.63 | 19.95 | 77.95  | 3.84   |
| 9 | 10 | 8.45   | 3.97   | 14.49 | 45.68  | 5.05   |
| 9 | 11 | 138.73 | 48.04  | 22.43 | 2.02   | 4.27   |
| 9 | 12 | 30.43  | 22.61  | 6.58  | 11.71  | 6.70   |
| 9 | 13 | 24.23  | 16.07  | 44.62 | 369.84 | 9.68   |
| 9 | 14 | 7.09   | 8.00   | 93.05 | 25.87  | 107.15 |
| 9 | 15 | 19.74  | 6.63   | 11.12 | 36.83  | 1.54   |
| 9 | 16 | 4.79   | 30.08  | 2.06  | 1.05   | 4.61   |
| 9 | 17 | 74.57  | 26.66  | 8.33  | 4.04   | 1.07   |
| 9 | 18 | 1.69   | 3.86   | 3.53  | 4.97   | 4.27   |
| 9 | 19 | 7.06   | 37.37  | 11.45 | 1.35   | 1.97   |
| 9 | 20 | 1.24   | 35.21  | 7.88  | 11.51  | 0.32   |
| 9 | 21 | 116.10 | 33.00  | 1.79  | 0.45   | 8.34   |
| 9 | 22 | 79.57  | 11.40  | 1.85  | 0.48   | 9.58   |
| 9 | 23 | 9.05   | 1.36   | 7.12  | 1.30   | 7.14   |
| 9 | 24 | 2.33   | 7.84   | 22.25 | 1.87   | 21.37  |
| 9 | 25 | 1.74   | 234.29 | 13.50 | 14.74  | 105.10 |

|    |    |        |        |        |        |        |
|----|----|--------|--------|--------|--------|--------|
| 9  | 26 | 8.55   | 21.19  | 101.53 | 13.64  | 5.47   |
| 9  | 27 | 21.77  | 24.88  | 4.05   | 3.02   | 8.97   |
| 9  | 28 | 15.16  | 133.81 | 11.95  | 6.72   | 6.99   |
| 9  | 29 | 78.81  | 93.20  | 6.54   | 2.45   | 5.26   |
| 9  | 30 | 12.28  | 432.16 | 45.02  | 12.98  | 1.04   |
| 10 | 0  | 12.29  | 1.51   | 21.54  | 8.81   | 19.58  |
| 10 | 1  | 609.02 | 43.23  | 16.25  | 27.67  | 662.67 |
| 10 | 2  | 104.19 | 26.62  | 74.03  | 168.48 | 33.13  |
| 10 | 3  | 65.66  | 8.80   | 1.97   | 14.97  | 2.70   |
| 10 | 4  | 541.82 | 20.87  | 8.15   | 16.55  | 1.67   |
| 10 | 5  | 68.03  | 2.29   | 8.43   | 64.02  | 3.76   |
| 10 | 6  | 12.15  | 0.28   | 2.33   | 3.38   | 2.52   |
| 10 | 7  | 59.23  | 6.57   | 2.90   | 4.01   | 0.76   |
| 10 | 8  | 73.98  | 2.24   | 0.80   | 1.16   | 1.06   |
| 10 | 9  | 2.01   | 1.76   | 26.81  | 34.99  | 10.05  |
| 10 | 10 | 46.43  | 3.26   | 27.27  | 14.08  | 34.53  |
| 10 | 11 | 79.18  | 18.30  | 9.20   | 5.66   | 4.32   |
| 10 | 12 | 78.92  | 31.32  | 2.23   | 25.68  | 8.16   |
| 10 | 13 | 17.34  | 4.47   | 88.42  | 180.57 | 62.70  |
| 10 | 14 | 17.95  | 1.74   | 32.34  | 44.10  | 721.62 |
| 10 | 15 | 16.56  | 3.27   | 4.44   | 18.50  | 3.31   |
| 10 | 16 | 8.83   | 0.66   | 4.47   | 2.16   | 5.85   |
| 10 | 17 | 130.56 | 32.19  | 2.77   | 10.21  | 0.44   |
| 10 | 18 | 1.64   | 1.31   | 4.05   | 4.68   | 7.19   |
| 10 | 19 | 16.83  | 5.41   | 5.18   | 4.55   | 0.99   |
| 10 | 20 | 2.92   | 20.68  | 3.83   | 4.70   | 0.48   |
| 10 | 21 | 201.83 | 1.22   | 0.83   | 1.39   | 5.10   |
| 10 | 22 | 138.31 | 2.06   | 0.39   | 0.97   | 7.62   |
| 10 | 23 | 25.78  | 10.25  | 3.17   | 4.81   | 6.12   |
| 10 | 24 | 8.06   | 1.48   | 10.75  | 8.52   | 22.33  |
| 10 | 25 | 3.56   | 1.55   | 5.27   | 69.05  | 18.68  |
| 10 | 26 | 14.12  | 0.87   | 38.05  | 34.09  | 5.24   |
| 10 | 27 | 38.76  | 2.26   | 2.20   | 8.07   | 55.60  |
| 10 | 28 | 26.02  | 1.64   | 9.67   | 23.75  | 46.42  |
| 10 | 29 | 142.16 | 0.88   | 8.47   | 7.85   | 5.36   |
| 10 | 30 | 23.96  | 3.94   | 23.41  | 4.42   | 0.48   |
| 11 | 0  | 5.56   | 23.93  | 260.05 | 9.43   | 39.11  |
| 11 | 1  | 134.79 | 6.21   | 10.90  | 99.61  | 0.62   |
| 11 | 2  | 46.39  | 677.39 | 34.54  | 416.44 | 0.37   |
| 11 | 3  | 44.68  | 14.51  | 1.90   | 54.36  | 0.98   |
| 11 | 4  | 117.03 | 5.30   | 8.01   | 71.82  | 0.62   |
| 11 | 5  | 22.54  | 1.95   | 9.46   | 78.93  | 6.78   |
| 11 | 6  | 5.12   | 3.95   | 27.94  | 39.36  | 1.98   |
| 11 | 7  | 24.81  | 1.47   | 3.75   | 10.60  | 4.10   |

|    |    |        |        |        |        |        |
|----|----|--------|--------|--------|--------|--------|
| 11 | 8  | 10.70  | 6.64   | 0.55   | 12.61  | 5.91   |
| 11 | 9  | 1.93   | 31.91  | 5.27   | 48.87  | 8.27   |
| 11 | 10 | 2.97   | 27.50  | 4.16   | 33.61  | 1.13   |
| 11 | 11 | 48.49  | 7.26   | 83.01  | 6.48   | 3.89   |
| 11 | 12 | 40.26  | 6.82   | 5.90   | 28.41  | 4.62   |
| 11 | 13 | 11.83  | 15.67  | 37.05  | 442.83 | 0.74   |
| 11 | 14 | 2.83   | 35.51  | 123.96 | 65.73  | 2.74   |
| 11 | 15 | 19.74  | 20.01  | 25.47  | 44.64  | 6.98   |
| 11 | 16 | 1.55   | 16.98  | 2.42   | 3.52   | 6.96   |
| 11 | 17 | 29.69  | 721.35 | 13.49  | 11.69  | 0.69   |
| 11 | 18 | 0.69   | 1.87   | 1.22   | 8.22   | 9.81   |
| 11 | 19 | 2.50   | 3.54   | 57.75  | 4.60   | 10.80  |
| 11 | 20 | 0.33   | 15.93  | 33.57  | 13.76  | 2.26   |
| 11 | 21 | 42.58  | 8.34   | 7.32   | 2.75   | 8.50   |
| 11 | 22 | 29.25  | 16.78  | 16.79  | 1.61   | 121.07 |
| 11 | 23 | 2.34   | 4.28   | 15.96  | 2.23   | 56.44  |
| 11 | 24 | 1.15   | 3.79   | 116.31 | 17.52  | 119.51 |
| 11 | 25 | 0.63   | 7.60   | 26.05  | 86.74  | 629.30 |
| 11 | 26 | 2.92   | 7.67   | 277.66 | 31.99  | 36.55  |
| 11 | 27 | 7.65   | 2.24   | 37.39  | 21.03  | 4.82   |
| 11 | 28 | 5.35   | 27.24  | 135.99 | 26.28  | 2.02   |
| 11 | 29 | 31.51  | 14.14  | 1.82   | 8.17   | 23.40  |
| 11 | 30 | 6.83   | 10.58  | 493.47 | 17.18  | 3.20   |
| 12 | 0  | 3.68   | 2.57   | 21.04  | 307.35 | 15.58  |
| 12 | 1  | 172.24 | 84.72  | 8.46   | 15.15  | 0.68   |
| 12 | 2  | 55.55  | 26.31  | 658.80 | 18.82  | 3.65   |
| 12 | 3  | 79.02  | 12.18  | 2.15   | 7.45   | 0.43   |
| 12 | 4  | 143.95 | 72.92  | 6.58   | 10.06  | 5.68   |
| 12 | 5  | 51.67  | 6.71   | 6.14   | 26.57  | 6.82   |
| 12 | 6  | 30.78  | 0.90   | 13.04  | 13.79  | 0.21   |
| 12 | 7  | 51.72  | 12.38  | 57.79  | 40.30  | 0.35   |
| 12 | 8  | 4.79   | 0.99   | 6.76   | 1.35   | 1.97   |
| 12 | 9  | 0.60   | 1.86   | 8.19   | 2.57   | 0.78   |
| 12 | 10 | 14.48  | 2.45   | 8.06   | 2.90   | 0.57   |
| 12 | 11 | 10.18  | 17.09  | 14.53  | 113.41 | 44.26  |
| 12 | 12 | 75.06  | 29.32  | 18.59  | 14.06  | 0.08   |
| 12 | 13 | 3.37   | 5.17   | 713.61 | 17.72  | 1.01   |
| 12 | 14 | 4.55   | 1.02   | 26.42  | 40.17  | 0.70   |
| 12 | 15 | 37.68  | 2.10   | 3.12   | 3.04   | 3.57   |
| 12 | 16 | 3.22   | 0.65   | 38.13  | 31.67  | 20.93  |
| 12 | 17 | 38.37  | 29.14  | 1.91   | 6.28   | 2.56   |
| 12 | 18 | 0.63   | 3.07   | 1.20   | 47.09  | 12.94  |
| 12 | 19 | 2.54   | 4.96   | 6.05   | 36.03  | 10.13  |
| 12 | 20 | 0.81   | 19.11  | 1.73   | 8.95   | 1.42   |

|    |    |        |        |        |        |       |
|----|----|--------|--------|--------|--------|-------|
| 12 | 21 | 50.73  | 0.55   | 0.77   | 5.41   | 2.23  |
| 12 | 22 | 34.98  | 4.87   | 3.80   | 23.11  | 6.55  |
| 12 | 23 | 11.13  | 17.42  | 2.98   | 20.53  | 10.50 |
| 12 | 24 | 0.55   | 0.99   | 5.73   | 191.52 | 3.19  |
| 12 | 25 | 1.52   | 0.34   | 3.26   | 104.10 | 27.92 |
| 12 | 26 | 6.97   | 0.84   | 26.62  | 34.58  | 1.42  |
| 12 | 27 | 13.45  | 2.16   | 6.07   | 509.58 | 0.70  |
| 12 | 28 | 8.88   | 0.49   | 36.29  | 88.30  | 0.39  |
| 12 | 29 | 39.20  | 0.32   | 58.29  | 14.51  | 15.85 |
| 12 | 30 | 1.27   | 3.39   | 44.02  | 74.24  | 3.00  |
| 13 | 0  | 292.27 | 21.63  | 12.74  | 14.33  | 0.54  |
| 13 | 1  | 4.28   | 128.28 | 26.87  | 85.73  | 39.89 |
| 13 | 2  | 35.61  | 15.53  | 150.59 | 382.19 | 2.59  |
| 13 | 3  | 27.33  | 664.76 | 2.87   | 47.32  | 32.91 |
| 13 | 4  | 5.94   | 123.65 | 21.01  | 68.00  | 2.15  |
| 13 | 5  | 35.65  | 14.73  | 14.16  | 56.45  | 0.78  |
| 13 | 6  | 21.09  | 3.73   | 6.05   | 90.00  | 36.79 |
| 13 | 7  | 8.27   | 4.99   | 16.63  | 29.32  | 0.86  |
| 13 | 8  | 5.88   | 9.27   | 3.45   | 24.08  | 0.79  |
| 13 | 9  | 18.90  | 49.03  | 25.69  | 26.41  | 0.78  |
| 13 | 10 | 3.00   | 10.35  | 21.79  | 7.05   | 1.11  |
| 13 | 11 | 17.33  | 9.09   | 5.75   | 3.57   | 0.27  |
| 13 | 12 | 9.31   | 5.34   | 6.07   | 11.46  | 15.00 |
| 13 | 13 | 11.98  | 10.56  | 168.97 | 397.34 | 1.38  |
| 13 | 14 | 109.88 | 7.39   | 53.71  | 24.17  | 10.27 |
| 13 | 15 | 36.54  | 12.18  | 4.13   | 41.77  | 0.17  |
| 13 | 16 | 5.57   | 9.58   | 9.43   | 1.25   | 0.56  |
| 13 | 17 | 4.69   | 16.44  | 5.48   | 8.44   | 5.34  |
| 13 | 18 | 3.28   | 5.43   | 5.39   | 5.08   | 0.41  |
| 13 | 19 | 59.39  | 172.48 | 4.20   | 2.94   | 0.88  |
| 13 | 20 | 10.77  | 685.54 | 1.96   | 12.55  | 1.91  |
| 13 | 21 | 39.28  | 29.71  | 0.25   | 0.39   | 33.18 |
| 13 | 22 | 59.06  | 12.66  | 2.84   | 0.68   | 1.66  |
| 13 | 23 | 60.06  | 23.97  | 4.78   | 0.71   | 5.53  |
| 13 | 24 | 511.28 | 6.23   | 9.75   | 2.45   | 3.62  |
| 13 | 25 | 296.70 | 9.87   | 6.12   | 43.39  | 1.01  |
| 13 | 26 | 12.51  | 37.59  | 62.30  | 26.83  | 0.57  |
| 13 | 27 | 34.37  | 2.45   | 4.36   | 2.08   | 4.77  |
| 13 | 28 | 94.27  | 26.32  | 14.60  | 15.63  | 4.08  |
| 13 | 29 | 21.49  | 14.77  | 20.65  | 5.06   | 1.27  |
| 13 | 30 | 13.34  | 39.29  | 49.37  | 14.14  | 0.36  |
| 14 | 0  | 28.97  | 2.93   | 5.98   | 12.94  | 11.08 |
| 14 | 1  | 22.51  | 161.53 | 753.56 | 736.14 | 1.50  |
| 14 | 2  | 576.93 | 36.72  | 2.56   | 16.38  | 1.94  |

|    |    |        |        |        |        |        |
|----|----|--------|--------|--------|--------|--------|
| 14 | 3  | 141.86 | 60.95  | 112.96 | 408.79 | 1.95   |
| 14 | 4  | 5.25   | 154.12 | 734.52 | 596.03 | 1.84   |
| 14 | 5  | 520.31 | 13.53  | 10.47  | 26.57  | 2.73   |
| 14 | 6  | 104.70 | 1.60   | 0.46   | 9.64   | 1.31   |
| 14 | 7  | 15.52  | 15.58  | 3.78   | 4.41   | 29.47  |
| 14 | 8  | 17.46  | 8.37   | 36.35  | 56.60  | 34.23  |
| 14 | 9  | 4.13   | 2.69   | 1.84   | 1.58   | 6.48   |
| 14 | 10 | 26.61  | 2.58   | 0.65   | 0.77   | 0.88   |
| 14 | 11 | 23.03  | 9.54   | 3.79   | 4.61   | 2.37   |
| 14 | 12 | 50.69  | 3.09   | 0.23   | 3.13   | 0.51   |
| 14 | 13 | 85.41  | 3.26   | 1.58   | 17.79  | 0.29   |
| 14 | 14 | 24.74  | 2.52   | 4.21   | 6.37   | 0.39   |
| 14 | 15 | 47.99  | 1.21   | 1.00   | 2.93   | 1.29   |
| 14 | 16 | 2.96   | 0.72   | 3.22   | 1.04   | 3.26   |
| 14 | 17 | 2.73   | 32.52  | 16.14  | 3.32   | 0.73   |
| 14 | 18 | 3.92   | 0.95   | 121.46 | 13.22  | 6.31   |
| 14 | 19 | 4.86   | 17.24  | 1.29   | 8.62   | 27.63  |
| 14 | 20 | 2.11   | 64.86  | 1.09   | 108.04 | 1.10   |
| 14 | 21 | 1.97   | 1.63   | 1.08   | 1.95   | 5.26   |
| 14 | 22 | 4.01   | 9.31   | 11.50  | 0.29   | 18.74  |
| 14 | 23 | 109.39 | 25.29  | 1.64   | 0.39   | 18.27  |
| 14 | 24 | 29.78  | 3.18   | 1.68   | 4.03   | 3.73   |
| 14 | 25 | 11.27  | 0.38   | 2.14   | 16.60  | 6.07   |
| 14 | 26 | 65.77  | 4.17   | 6.12   | 9.72   | 2.78   |
| 14 | 27 | 42.56  | 0.79   | 1.66   | 6.58   | 1.87   |
| 14 | 28 | 34.74  | 3.43   | 61.24  | 10.72  | 1.87   |
| 14 | 29 | 27.38  | 2.17   | 72.11  | 5.53   | 14.45  |
| 14 | 30 | 12.99  | 6.22   | 41.69  | 113.03 | 3.31   |
| 15 | 0  | 19.76  | 12.40  | 178.03 | 229.76 | 27.16  |
| 15 | 1  | 24.02  | 720.55 | 5.12   | 3.22   | 1.67   |
| 15 | 2  | 506.63 | 6.54   | 11.95  | 4.34   | 2.42   |
| 15 | 3  | 85.10  | 105.63 | 3.61   | 2.47   | 666.18 |
| 15 | 4  | 1.78   | 691.90 | 4.07   | 4.34   | 40.34  |
| 15 | 5  | 445.74 | 60.60  | 371.96 | 17.44  | 86.21  |
| 15 | 6  | 73.20  | 7.79   | 575.87 | 200.04 | 0.85   |
| 15 | 7  | 23.39  | 2.23   | 102.92 | 646.36 | 5.18   |
| 15 | 8  | 15.57  | 37.09  | 2.59   | 9.86   | 4.59   |
| 15 | 9  | 9.63   | 6.68   | 9.50   | 4.79   | 20.00  |
| 15 | 10 | 27.95  | 6.19   | 5.02   | 2.54   | 5.05   |
| 15 | 11 | 57.57  | 3.83   | 74.90  | 34.61  | 1.89   |
| 15 | 12 | 62.88  | 2.66   | 62.38  | 126.12 | 1.19   |
| 15 | 13 | 54.63  | 10.51  | 6.66   | 4.86   | 5.45   |
| 15 | 14 | 28.05  | 2.91   | 40.94  | 67.61  | 2.45   |
| 15 | 15 | 35.44  | 3.16   | 40.09  | 1.45   | 8.41   |



|    |    |        |        |        |        |        |
|----|----|--------|--------|--------|--------|--------|
| 15 | 16 | 1.20   | 1.43   | 0.84   | 32.43  | 22.54  |
| 15 | 17 | 4.11   | 6.05   | 27.26  | 18.19  | 7.80   |
| 15 | 18 | 3.45   | 1.21   | 6.28   | 218.09 | 15.47  |
| 15 | 19 | 3.62   | 30.17  | 305.15 | 221.85 | 13.93  |
| 15 | 20 | 1.58   | 106.07 | 41.44  | 14.12  | 9.32   |
| 15 | 21 | 2.58   | 3.55   | 14.96  | 34.92  | 716.76 |
| 15 | 22 | 1.08   | 37.54  | 4.08   | 8.52   | 6.34   |
| 15 | 23 | 103.12 | 112.80 | 51.94  | 71.20  | 102.96 |
| 15 | 24 | 26.75  | 2.59   | 64.21  | 19.87  | 55.32  |
| 15 | 25 | 9.39   | 1.56   | 39.13  | 64.85  | 11.34  |
| 15 | 26 | 42.18  | 7.88   | 403.85 | 48.09  | 11.28  |
| 15 | 27 | 24.89  | 0.88   | 17.24  | 163.09 | 18.68  |
| 15 | 28 | 24.98  | 2.68   | 51.31  | 32.35  | 0.81   |
| 15 | 29 | 9.12   | 2.48   | 3.08   | 11.20  | 19.76  |
| 15 | 30 | 13.20  | 20.13  | 88.08  | 17.44  | 6.25   |
| 16 | 0  | 25.50  | 1.06   | 164.90 | 167.69 | 130.75 |
| 16 | 1  | 13.93  | 16.13  | 4.19   | 2.73   | 72.32  |
| 16 | 2  | 64.72  | 58.30  | 12.53  | 5.29   | 3.69   |
| 16 | 3  | 724.41 | 6.94   | 1.38   | 1.20   | 50.99  |
| 16 | 4  | 5.00   | 15.82  | 1.97   | 1.36   | 42.49  |
| 16 | 5  | 37.95  | 1.48   | 161.49 | 15.38  | 462.85 |
| 16 | 6  | 648.56 | 1.07   | 52.38  | 14.86  | 72.30  |
| 16 | 7  | 40.51  | 53.21  | 7.21   | 44.14  | 31.72  |
| 16 | 8  | 20.93  | 2.15   | 0.79   | 1.13   | 64.28  |
| 16 | 9  | 6.32   | 5.12   | 11.54  | 4.23   | 111.65 |
| 16 | 10 | 33.80  | 0.51   | 2.08   | 0.88   | 15.24  |
| 16 | 11 | 10.85  | 7.31   | 84.27  | 58.10  | 12.67  |
| 16 | 12 | 31.01  | 1.58   | 5.56   | 19.69  | 2.81   |
| 16 | 13 | 26.44  | 0.54   | 2.58   | 0.48   | 4.66   |
| 16 | 14 | 22.17  | 0.41   | 34.49  | 13.21  | 5.02   |
| 16 | 15 | 78.92  | 0.51   | 21.01  | 0.59   | 14.26  |
| 16 | 16 | 11.75  | 0.79   | 0.87   | 15.52  | 86.20  |
| 16 | 17 | 4.45   | 30.59  | 3.77   | 2.86   | 15.20  |
| 16 | 18 | 1.60   | 0.29   | 1.37   | 35.50  | 109.04 |
| 16 | 19 | 5.61   | 1.26   | 54.13  | 37.19  | 3.60   |
| 16 | 20 | 1.29   | 6.30   | 11.33  | 2.72   | 20.69  |
| 16 | 21 | 2.60   | 1.32   | 6.54   | 18.10  | 30.02  |
| 16 | 22 | 3.39   | 1.50   | 3.61   | 1.79   | 208.89 |
| 16 | 23 | 41.06  | 2.82   | 15.21  | 17.44  | 119.40 |
| 16 | 24 | 13.76  | 2.22   | 39.19  | 40.73  | 7.79   |
| 16 | 25 | 6.05   | 0.49   | 22.18  | 3.74   | 60.87  |
| 16 | 26 | 93.63  | 1.37   | 169.86 | 3.78   | 30.14  |
| 16 | 27 | 84.73  | 3.33   | 5.35   | 58.88  | 10.25  |
| 16 | 28 | 50.24  | 3.43   | 21.88  | 36.30  | 13.71  |

|    |    |        |        |        |        |        |
|----|----|--------|--------|--------|--------|--------|
| 16 | 29 | 17.89  | 1.68   | 3.39   | 10.19  | 25.95  |
| 16 | 30 | 99.28  | 0.66   | 65.75  | 19.27  | 5.48   |
| 17 | 0  | 198.48 | 136.37 | 34.44  | 69.58  | 109.59 |
| 17 | 1  | 2.64   | 1.47   | 1.32   | 12.21  | 616.62 |
| 17 | 2  | 11.54  | 2.94   | 24.27  | 199.12 | 32.04  |
| 17 | 3  | 0.79   | 7.30   | 2.58   | 3.70   | 31.70  |
| 17 | 4  | 4.15   | 2.16   | 0.52   | 8.07   | 24.56  |
| 17 | 5  | 9.04   | 3.74   | 143.56 | 650.95 | 252.36 |
| 17 | 6  | 9.80   | 274.87 | 60.66  | 121.75 | 605.82 |
| 17 | 7  | 1.21   | 2.30   | 11.82  | 41.11  | 11.98  |
| 17 | 8  | 5.01   | 0.27   | 1.48   | 45.50  | 15.80  |
| 17 | 9  | 694.66 | 36.95  | 23.79  | 142.94 | 53.26  |
| 17 | 10 | 6.22   | 0.71   | 1.12   | 5.04   | 22.93  |
| 17 | 11 | 8.76   | 3.90   | 13.36  | 46.91  | 3.78   |
| 17 | 12 | 2.62   | 4.36   | 9.76   | 17.67  | 3.91   |
| 17 | 13 | 13.38  | 2.20   | 1.13   | 2.93   | 5.03   |
| 17 | 14 | 47.65  | 1.13   | 11.99  | 11.54  | 1.02   |
| 17 | 15 | 11.23  | 1.12   | 8.58   | 2.01   | 13.12  |
| 17 | 16 | 2.62   | 15.42  | 0.92   | 17.96  | 38.15  |
| 17 | 17 | 3.60   | 4.02   | 20.92  | 57.87  | 8.90   |
| 17 | 18 | 8.21   | 12.98  | 2.32   | 42.77  | 31.41  |
| 17 | 19 | 218.74 | 39.20  | 53.20  | 49.14  | 1.87   |
| 17 | 20 | 47.83  | 12.83  | 6.21   | 6.62   | 10.97  |
| 17 | 21 | 114.04 | 143.60 | 3.23   | 13.19  | 20.15  |
| 17 | 22 | 173.37 | 20.57  | 3.03   | 4.16   | 134.31 |
| 17 | 23 | 5.04   | 4.44   | 41.87  | 2.85   | 71.07  |
| 17 | 24 | 199.26 | 20.33  | 6.73   | 36.74  | 31.64  |
| 17 | 25 | 95.97  | 40.77  | 12.61  | 567.24 | 26.35  |
| 17 | 26 | 9.81   | 4.27   | 142.85 | 256.27 | 25.32  |
| 17 | 27 | 24.91  | 20.19  | 3.21   | 32.00  | 75.08  |
| 17 | 28 | 31.47  | 9.55   | 26.12  | 189.28 | 64.87  |
| 17 | 29 | 14.96  | 12.40  | 4.60   | 62.69  | 14.86  |
| 17 | 30 | 5.37   | 55.45  | 32.94  | 27.94  | 5.17   |
| 18 | 0  | 13.21  | 13.45  | 23.54  | 18.81  | 180.01 |
| 18 | 1  | 3.50   | 7.12   | 2.76   | 2.96   | 413.96 |
| 18 | 2  | 45.38  | 5.47   | 748.80 | 574.50 | 21.51  |
| 18 | 3  | 211.35 | 42.98  | 2.33   | 1.88   | 52.68  |
| 18 | 4  | 0.99   | 8.56   | 0.99   | 2.09   | 42.31  |
| 18 | 5  | 13.00  | 0.84   | 31.52  | 163.92 | 463.77 |
| 18 | 6  | 174.03 | 35.11  | 45.49  | 327.21 | 407.53 |
| 18 | 7  | 5.30   | 4.57   | 120.81 | 104.37 | 16.21  |
| 18 | 8  | 9.80   | 1.16   | 41.24  | 123.69 | 33.50  |
| 18 | 9  | 21.10  | 8.73   | 728.40 | 430.71 | 69.71  |
| 18 | 10 | 4.89   | 0.72   | 1.37   | 4.63   | 10.46  |

|    |    |        |        |        |        |        |
|----|----|--------|--------|--------|--------|--------|
| 18 | 11 | 47.66  | 12.32  | 14.70  | 8.16   | 5.16   |
| 18 | 12 | 78.41  | 4.49   | 4.92   | 5.70   | 6.04   |
| 18 | 13 | 6.16   | 2.11   | 0.73   | 3.70   | 3.43   |
| 18 | 14 | 6.60   | 0.48   | 10.67  | 2.51   | 0.78   |
| 18 | 15 | 3.85   | 0.54   | 1.65   | 7.05   | 20.29  |
| 18 | 16 | 3.49   | 2.81   | 9.75   | 3.89   | 74.42  |
| 18 | 17 | 0.95   | 1.25   | 7.19   | 14.41  | 15.64  |
| 18 | 18 | 1.20   | 2.40   | 0.55   | 9.93   | 62.24  |
| 18 | 19 | 6.74   | 2.54   | 26.54  | 12.62  | 3.93   |
| 18 | 20 | 1.48   | 37.13  | 6.58   | 2.14   | 19.68  |
| 18 | 21 | 3.69   | 20.95  | 1.78   | 3.01   | 32.86  |
| 18 | 22 | 5.77   | 2.50   | 8.65   | 1.01   | 226.04 |
| 18 | 23 | 6.34   | 1.44   | 4.99   | 0.73   | 127.51 |
| 18 | 24 | 4.77   | 6.70   | 10.16  | 9.25   | 26.28  |
| 18 | 25 | 1.45   | 4.97   | 5.84   | 141.68 | 50.15  |
| 18 | 26 | 26.57  | 1.73   | 25.91  | 64.00  | 33.65  |
| 18 | 27 | 23.34  | 1.51   | 32.62  | 10.31  | 49.90  |
| 18 | 28 | 14.33  | 0.76   | 58.66  | 48.24  | 37.99  |
| 18 | 29 | 5.81   | 0.95   | 90.95  | 16.42  | 21.16  |
| 18 | 30 | 29.57  | 2.20   | 39.60  | 7.73   | 7.93   |
| 19 | 0  | 8.14   | 289.29 | 219.02 | 10.41  | 0.52   |
| 19 | 1  | 8.00   | 1.96   | 4.96   | 2.07   | 0.25   |
| 19 | 2  | 50.84  | 5.68   | 60.15  | 434.48 | 0.29   |
| 19 | 3  | 134.93 | 10.93  | 3.21   | 1.49   | 15.04  |
| 19 | 4  | 1.58   | 9.39   | 1.22   | 0.99   | 1.14   |
| 19 | 5  | 27.31  | 10.44  | 527.86 | 78.71  | 0.75   |
| 19 | 6  | 116.69 | 655.68 | 400.57 | 247.96 | 1.96   |
| 19 | 7  | 4.50   | 5.78   | 76.53  | 78.75  | 0.16   |
| 19 | 8  | 9.95   | 0.61   | 3.71   | 93.81  | 0.18   |
| 19 | 9  | 5.24   | 72.90  | 57.36  | 327.75 | 0.14   |
| 19 | 10 | 12.88  | 4.10   | 2.11   | 3.83   | 0.15   |
| 19 | 11 | 48.60  | 14.20  | 114.85 | 3.08   | 0.07   |
| 19 | 12 | 14.11  | 4.33   | 44.64  | 3.89   | 12.33  |
| 19 | 13 | 5.66   | 7.29   | 3.25   | 8.52   | 0.59   |
| 19 | 14 | 8.40   | 2.81   | 63.03  | 1.83   | 2.41   |
| 19 | 15 | 12.18  | 1.85   | 13.92  | 3.90   | 0.10   |
| 19 | 16 | 2.51   | 37.98  | 2.24   | 1.61   | 0.14   |
| 19 | 17 | 0.69   | 5.56   | 55.52  | 6.90   | 1.04   |
| 19 | 18 | 0.30   | 39.33  | 6.77   | 5.16   | 0.21   |
| 19 | 19 | 1.72   | 166.36 | 236.20 | 7.43   | 0.20   |
| 19 | 20 | 0.76   | 23.73  | 67.21  | 1.37   | 3.61   |
| 19 | 21 | 1.38   | 359.83 | 14.56  | 1.59   | 12.25  |
| 19 | 22 | 2.24   | 47.42  | 16.37  | 0.46   | 1.03   |
| 19 | 23 | 1.90   | 4.62   | 7.76   | 0.66   | 2.37   |

|    |    |        |        |        |        |        |
|----|----|--------|--------|--------|--------|--------|
| 19 | 24 | 1.44   | 49.90  | 123.72 | 4.59   | 1.16   |
| 19 | 25 | 2.56   | 74.11  | 66.13  | 67.28  | 0.15   |
| 19 | 26 | 21.90  | 9.46   | 486.49 | 30.85  | 0.17   |
| 19 | 27 | 16.96  | 28.84  | 2.43   | 5.93   | 0.51   |
| 19 | 28 | 10.38  | 21.09  | 17.11  | 23.44  | 0.30   |
| 19 | 29 | 5.57   | 26.93  | 12.21  | 7.00   | 0.65   |
| 19 | 30 | 19.20  | 56.73  | 208.42 | 3.87   | 1.45   |
| 20 | 0  | 167.81 | 3.64   | 2.13   | 102.39 | 80.51  |
| 20 | 1  | 4.53   | 6.33   | 1.25   | 0.68   | 5.23   |
| 20 | 2  | 2.50   | 5.41   | 58.67  | 7.88   | 0.23   |
| 20 | 3  | 3.90   | 60.47  | 0.22   | 1.40   | 3.55   |
| 20 | 4  | 0.97   | 6.69   | 0.90   | 2.89   | 2.02   |
| 20 | 5  | 0.80   | 1.46   | 1.08   | 28.61  | 24.67  |
| 20 | 6  | 2.68   | 4.78   | 1.69   | 89.52  | 3.65   |
| 20 | 7  | 3.09   | 4.80   | 8.40   | 292.05 | 25.97  |
| 20 | 8  | 1.61   | 0.70   | 2.97   | 5.25   | 26.55  |
| 20 | 9  | 29.29  | 7.33   | 53.92  | 6.26   | 103.45 |
| 20 | 10 | 0.76   | 2.48   | 0.71   | 1.72   | 11.41  |
| 20 | 11 | 1.26   | 44.52  | 0.62   | 25.81  | 7.00   |
| 20 | 12 | 2.81   | 8.98   | 0.36   | 103.33 | 3.70   |
| 20 | 13 | 19.76  | 4.74   | 10.23  | 1.59   | 0.92   |
| 20 | 14 | 79.87  | 0.65   | 0.75   | 39.56  | 0.97   |
| 20 | 15 | 15.49  | 3.06   | 0.09   | 0.86   | 13.88  |
| 20 | 16 | 1.93   | 1.11   | 0.09   | 51.40  | 30.84  |
| 20 | 17 | 4.67   | 1.47   | 0.40   | 5.49   | 1.39   |
| 20 | 18 | 2.11   | 3.06   | 0.11   | 165.87 | 36.61  |
| 20 | 19 | 38.22  | 10.00  | 0.22   | 166.56 | 4.34   |
| 20 | 20 | 7.79   | 35.80  | 0.13   | 7.26   | 2.61   |
| 20 | 21 | 25.69  | 1.86   | 0.16   | 24.06  | 5.05   |
| 20 | 22 | 38.23  | 0.26   | 1.17   | 3.05   | 15.68  |
| 20 | 23 | 4.12   | 0.95   | 0.33   | 54.29  | 6.94   |
| 20 | 24 | 35.17  | 0.71   | 0.41   | 46.31  | 5.55   |
| 20 | 25 | 37.05  | 1.04   | 0.25   | 6.79   | 23.30  |
| 20 | 26 | 6.13   | 3.30   | 0.77   | 6.11   | 16.13  |
| 20 | 27 | 3.31   | 3.87   | 2.73   | 77.19  | 2.18   |
| 20 | 28 | 16.73  | 2.22   | 4.51   | 15.55  | 3.21   |
| 20 | 29 | 2.21   | 0.80   | 7.14   | 8.51   | 6.32   |
| 20 | 30 | 8.20   | 3.46   | 2.52   | 9.87   | 1.63   |
| 21 | 0  | 11.51  | 35.30  | 92.87  | 245.71 | 419.78 |
| 21 | 1  | 70.94  | 4.93   | 7.78   | 2.40   | 4.19   |
| 21 | 2  | 4.01   | 748.37 | 0.62   | 1.46   | 0.49   |
| 21 | 3  | 6.67   | 19.02  | 0.54   | 1.39   | 26.14  |
| 21 | 4  | 33.57  | 4.05   | 5.86   | 2.02   | 24.86  |
| 21 | 5  | 3.09   | 5.47   | 21.11  | 16.77  | 248.79 |

|    |    |        |        |        |        |        |
|----|----|--------|--------|--------|--------|--------|
| 21 | 6  | 4.19   | 12.65  | 15.53  | 11.61  | 5.24   |
| 21 | 7  | 86.87  | 716.79 | 2.87   | 39.08  | 154.17 |
| 21 | 8  | 48.05  | 35.24  | 0.40   | 0.85   | 155.40 |
| 21 | 9  | 3.66   | 96.06  | 1.09   | 3.65   | 592.65 |
| 21 | 10 | 3.24   | 26.51  | 8.52   | 1.12   | 65.59  |
| 21 | 11 | 2.49   | 21.14  | 57.60  | 290.20 | 49.06  |
| 21 | 12 | 6.88   | 5.48   | 4.30   | 30.72  | 24.46  |
| 21 | 13 | 3.11   | 7.19   | 1.70   | 1.82   | 2.58   |
| 21 | 14 | 12.59  | 19.12  | 16.71  | 31.76  | 2.53   |
| 21 | 15 | 3.69   | 11.50  | 12.43  | 2.64   | 31.74  |
| 21 | 16 | 0.87   | 9.04   | 0.58   | 36.66  | 235.54 |
| 21 | 17 | 0.52   | 4.93   | 11.60  | 1.46   | 8.58   |
| 21 | 18 | 0.40   | 1.70   | 1.48   | 28.70  | 245.34 |
| 21 | 19 | 2.27   | 6.72   | 10.58  | 29.42  | 22.49  |
| 21 | 20 | 0.69   | 6.74   | 16.44  | 3.19   | 5.19   |
| 21 | 21 | 18.44  | 9.54   | 11.63  | 16.91  | 6.79   |
| 21 | 22 | 12.77  | 5.35   | 3.69   | 2.96   | 120.24 |
| 21 | 23 | 0.76   | 2.32   | 16.28  | 9.91   | 68.24  |
| 21 | 24 | 4.65   | 1.86   | 23.16  | 38.11  | 16.51  |
| 21 | 25 | 2.93   | 9.49   | 4.22   | 12.35  | 42.33  |
| 21 | 26 | 1.49   | 4.32   | 31.59  | 5.95   | 86.56  |
| 21 | 27 | 2.63   | 2.57   | 2.49   | 123.37 | 21.76  |
| 21 | 28 | 1.56   | 18.80  | 5.47   | 30.33  | 28.23  |
| 21 | 29 | 9.44   | 9.34   | 1.14   | 6.09   | 2.60   |
| 21 | 30 | 1.95   | 32.80  | 17.33  | 21.31  | 3.44   |
| 22 | 0  | 16.89  | 127.72 | 6.54   | 246.00 | 75.21  |
| 22 | 1  | 98.91  | 3.53   | 131.41 | 5.45   | 0.32   |
| 22 | 2  | 5.63   | 31.88  | 0.78   | 7.29   | 0.05   |
| 22 | 3  | 2.81   | 56.10  | 13.49  | 3.84   | 3.83   |
| 22 | 4  | 48.45  | 3.29   | 82.72  | 4.51   | 2.21   |
| 22 | 5  | 4.57   | 3.27   | 4.72   | 82.45  | 19.61  |
| 22 | 6  | 2.62   | 54.87  | 2.14   | 35.17  | 0.70   |
| 22 | 7  | 116.88 | 41.53  | 0.64   | 106.52 | 28.55  |
| 22 | 8  | 64.56  | 2.75   | 7.28   | 2.29   | 31.10  |
| 22 | 9  | 4.93   | 255.78 | 0.81   | 8.02   | 102.86 |
| 22 | 10 | 4.87   | 13.02  | 123.70 | 4.59   | 16.15  |
| 22 | 11 | 3.38   | 63.84  | 5.11   | 488.11 | 8.58   |
| 22 | 12 | 1.63   | 17.36  | 1.50   | 44.21  | 4.63   |
| 22 | 13 | 4.57   | 14.11  | 0.74   | 5.06   | 0.78   |
| 22 | 14 | 15.77  | 5.78   | 2.99   | 91.65  | 0.79   |
| 22 | 15 | 3.20   | 9.44   | 0.54   | 4.99   | 7.14   |
| 22 | 16 | 1.98   | 36.50  | 0.33   | 44.88  | 15.88  |
| 22 | 17 | 1.08   | 7.73   | 0.84   | 4.38   | 0.32   |
| 22 | 18 | 0.33   | 5.89   | 0.40   | 60.25  | 27.79  |

|    |    |       |        |        |        |       |
|----|----|-------|--------|--------|--------|-------|
| 22 | 19 | 2.76  | 22.61  | 1.37   | 55.95  | 1.71  |
| 22 | 20 | 0.67  | 7.90   | 1.92   | 4.78   | 1.38  |
| 22 | 21 | 25.68 | 48.13  | 1.26   | 48.93  | 3.10  |
| 22 | 22 | 17.89 | 8.41   | 1.40   | 7.34   | 11.33 |
| 22 | 23 | 1.74  | 1.71   | 1.35   | 24.27  | 11.16 |
| 22 | 24 | 6.45  | 6.37   | 1.10   | 40.67  | 9.61  |
| 22 | 25 | 3.82  | 21.29  | 0.21   | 33.24  | 3.45  |
| 22 | 26 | 1.70  | 42.66  | 4.81   | 14.73  | 14.75 |
| 22 | 27 | 3.51  | 6.50   | 0.59   | 190.97 | 27.31 |
| 22 | 28 | 2.40  | 24.93  | 13.35  | 56.13  | 27.16 |
| 22 | 29 | 13.53 | 10.76  | 15.33  | 10.39  | 3.21  |
| 22 | 30 | 2.02  | 107.91 | 8.89   | 40.01  | 1.24  |
| 23 | 0  | 2.12  | 206.47 | 209.64 | 92.48  | 21.35 |
| 23 | 1  | 13.80 | 4.75   | 2.63   | 1.78   | 0.17  |
| 23 | 2  | 3.44  | 45.04  | 4.57   | 1.26   | 0.05  |
| 23 | 3  | 13.52 | 79.71  | 0.75   | 0.91   | 0.91  |
| 23 | 4  | 2.07  | 4.79   | 1.54   | 1.36   | 4.11  |
| 23 | 5  | 1.35  | 3.27   | 97.37  | 59.95  | 41.06 |
| 23 | 6  | 9.18  | 51.83  | 45.63  | 6.10   | 0.24  |
| 23 | 7  | 8.64  | 60.79  | 8.70   | 16.20  | 7.74  |
| 23 | 8  | 4.77  | 6.12   | 0.74   | 0.65   | 10.62 |
| 23 | 9  | 0.32  | 396.13 | 3.68   | 2.58   | 27.16 |
| 23 | 10 | 0.87  | 15.48  | 1.11   | 1.35   | 4.60  |
| 23 | 11 | 5.09  | 92.55  | 241.05 | 183.27 | 2.30  |
| 23 | 12 | 6.94  | 26.27  | 27.26  | 28.45  | 0.25  |
| 23 | 13 | 1.86  | 21.20  | 3.68   | 3.95   | 0.82  |
| 23 | 14 | 1.40  | 10.12  | 98.83  | 46.44  | 1.08  |
| 23 | 15 | 2.61  | 6.82   | 44.41  | 2.08   | 6.24  |
| 23 | 16 | 0.68  | 56.00  | 0.65   | 17.05  | 24.54 |
| 23 | 17 | 1.14  | 12.28  | 8.05   | 2.17   | 1.80  |
| 23 | 18 | 0.43  | 8.33   | 1.37   | 13.68  | 10.65 |
| 23 | 19 | 0.15  | 23.71  | 44.47  | 11.61  | 1.08  |
| 23 | 20 | 0.09  | 16.29  | 11.13  | 1.77   | 0.42  |
| 23 | 21 | 0.24  | 55.82  | 4.96   | 13.47  | 0.35  |
| 23 | 22 | 0.34  | 7.53   | 4.18   | 2.23   | 3.36  |
| 23 | 23 | 0.46  | 2.71   | 11.04  | 9.29   | 2.69  |
| 23 | 24 | 0.32  | 8.91   | 19.82  | 12.82  | 6.48  |
| 23 | 25 | 0.70  | 31.32  | 3.21   | 25.08  | 1.39  |
| 23 | 26 | 1.38  | 31.79  | 45.99  | 11.22  | 1.74  |
| 23 | 27 | 1.16  | 12.31  | 5.68   | 74.23  | 2.03  |
| 23 | 28 | 0.79  | 25.36  | 25.89  | 24.17  | 1.41  |
| 23 | 29 | 3.73  | 19.22  | 1.15   | 5.71   | 8.39  |
| 23 | 30 | 1.24  | 172.67 | 121.00 | 15.48  | 44.31 |
| 24 | 0  | 19.77 | 176.52 | 113.46 | 7.34   | 11.58 |

|    |    |        |        |        |        |        |
|----|----|--------|--------|--------|--------|--------|
| 24 | 1  | 1.47   | 6.92   | 5.69   | 115.91 | 0.32   |
| 24 | 2  | 0.65   | 46.43  | 2.96   | 0.70   | 1.90   |
| 24 | 3  | 0.45   | 88.82  | 1.13   | 43.13  | 4.55   |
| 24 | 4  | 0.45   | 8.80   | 3.35   | 59.95  | 1.99   |
| 24 | 5  | 1.12   | 3.51   | 71.40  | 4.82   | 4.01   |
| 24 | 6  | 0.63   | 59.42  | 80.86  | 4.01   | 0.48   |
| 24 | 7  | 1.35   | 61.46  | 15.47  | 7.47   | 10.56  |
| 24 | 8  | 0.66   | 5.99   | 0.95   | 16.00  | 8.73   |
| 24 | 9  | 4.90   | 457.38 | 4.31   | 3.19   | 6.27   |
| 24 | 10 | 0.17   | 18.96  | 4.73   | 111.03 | 0.34   |
| 24 | 11 | 1.45   | 107.31 | 77.54  | 12.43  | 31.12  |
| 24 | 12 | 0.50   | 29.97  | 24.28  | 1.40   | 4.39   |
| 24 | 13 | 1.11   | 25.12  | 2.33   | 0.70   | 0.88   |
| 24 | 14 | 5.69   | 10.39  | 59.44  | 3.17   | 0.47   |
| 24 | 15 | 1.39   | 10.00  | 22.66  | 0.32   | 8.72   |
| 24 | 16 | 0.57   | 46.66  | 0.65   | 1.77   | 3.06   |
| 24 | 17 | 0.37   | 14.10  | 10.02  | 0.47   | 0.58   |
| 24 | 18 | 0.12   | 6.90   | 2.02   | 3.05   | 3.34   |
| 24 | 19 | 3.39   | 28.56  | 56.60  | 3.07   | 1.08   |
| 24 | 20 | 0.73   | 27.53  | 24.75  | 0.48   | 0.07   |
| 24 | 21 | 1.55   | 44.66  | 14.26  | 1.67   | 0.19   |
| 24 | 22 | 1.45   | 9.91   | 3.66   | 0.27   | 1.80   |
| 24 | 23 | 1.32   | 1.46   | 9.41   | 1.23   | 3.10   |
| 24 | 24 | 11.92  | 4.06   | 13.24  | 1.48   | 1.17   |
| 24 | 25 | 9.07   | 18.51  | 6.58   | 4.27   | 0.55   |
| 24 | 26 | 2.59   | 5.04   | 28.06  | 1.79   | 1.74   |
| 24 | 27 | 5.05   | 9.62   | 4.36   | 5.64   | 0.75   |
| 24 | 28 | 6.81   | 26.90  | 16.73  | 3.17   | 0.60   |
| 24 | 29 | 2.91   | 16.14  | 0.78   | 1.05   | 7.48   |
| 24 | 30 | 1.34   | 193.78 | 60.46  | 15.66  | 2.30   |
| 25 | 0  | 132.31 | 163.07 | 169.72 | 161.96 | 193.64 |
| 25 | 1  | 412.19 | 5.91   | 2.76   | 1.79   | 3.65   |
| 25 | 2  | 6.07   | 18.22  | 5.94   | 1.20   | 0.13   |
| 25 | 3  | 6.18   | 89.33  | 1.75   | 0.94   | 46.63  |
| 25 | 4  | 62.86  | 6.94   | 3.05   | 1.32   | 4.47   |
| 25 | 5  | 3.29   | 2.23   | 208.71 | 84.14  | 57.29  |
| 25 | 6  | 6.09   | 53.46  | 145.43 | 136.70 | 3.07   |
| 25 | 7  | 269.91 | 21.43  | 26.12  | 447.16 | 27.75  |
| 25 | 8  | 130.89 | 2.60   | 1.58   | 6.46   | 30.20  |
| 25 | 9  | 55.56  | 154.45 | 6.72   | 5.54   | 84.06  |
| 25 | 10 | 7.41   | 5.23   | 2.58   | 3.13   | 9.25   |
| 25 | 11 | 7.65   | 90.69  | 283.81 | 61.57  | 6.73   |
| 25 | 12 | 7.51   | 17.52  | 29.91  | 169.92 | 44.89  |
| 25 | 13 | 46.53  | 12.14  | 6.73   | 2.49   | 3.27   |

|    |    |        |        |        |        |        |
|----|----|--------|--------|--------|--------|--------|
| 25 | 14 | 194.58 | 3.71   | 191.31 | 6.91   | 1.87   |
| 25 | 15 | 39.07  | 6.05   | 19.44  | 2.62   | 31.79  |
| 25 | 16 | 6.24   | 18.48  | 1.47   | 131.61 | 32.82  |
| 25 | 17 | 35.42  | 4.72   | 24.82  | 20.94  | 3.78   |
| 25 | 18 | 1.77   | 5.17   | 2.97   | 223.78 | 49.51  |
| 25 | 19 | 48.23  | 16.96  | 116.06 | 220.51 | 2.46   |
| 25 | 20 | 8.07   | 13.23  | 38.05  | 8.14   | 3.21   |
| 25 | 21 | 20.84  | 25.74  | 20.46  | 45.23  | 4.43   |
| 25 | 22 | 31.11  | 2.86   | 5.54   | 4.80   | 33.94  |
| 25 | 23 | 6.67   | 1.57   | 19.97  | 82.90  | 13.63  |
| 25 | 24 | 49.62  | 2.40   | 11.67  | 14.38  | 3.26   |
| 25 | 25 | 44.28  | 3.08   | 8.94   | 12.34  | 5.09   |
| 25 | 26 | 10.32  | 13.68  | 48.46  | 3.99   | 46.72  |
| 25 | 27 | 17.57  | 4.15   | 4.94   | 6.35   | 5.75   |
| 25 | 28 | 10.56  | 10.67  | 34.61  | 8.18   | 10.15  |
| 25 | 29 | 109.08 | 4.87   | 1.08   | 9.49   | 2.48   |
| 25 | 30 | 6.78   | 85.99  | 162.20 | 3.90   | 2.42   |
| 26 | 0  | 371.26 | 62.64  | 56.59  | 27.90  | 32.15  |
| 26 | 1  | 138.25 | 2.84   | 0.53   | 0.53   | 0.28   |
| 26 | 2  | 14.08  | 6.37   | 0.78   | 0.26   | 2.55   |
| 26 | 3  | 15.31  | 734.77 | 0.38   | 0.21   | 743.99 |
| 26 | 4  | 16.26  | 2.10   | 0.83   | 0.28   | 39.84  |
| 26 | 5  | 14.72  | 8.87   | 34.09  | 5.69   | 29.05  |
| 26 | 6  | 9.03   | 24.87  | 51.44  | 2.10   | 0.34   |
| 26 | 7  | 93.04  | 9.84   | 9.51   | 6.49   | 13.09  |
| 26 | 8  | 46.12  | 8.55   | 0.34   | 0.28   | 13.11  |
| 26 | 9  | 170.95 | 186.93 | 1.21   | 0.44   | 36.22  |
| 26 | 10 | 4.88   | 37.19  | 0.69   | 0.65   | 4.92   |
| 26 | 11 | 24.08  | 680.69 | 13.02  | 6.36   | 5.89   |
| 26 | 12 | 19.26  | 113.36 | 7.09   | 4.64   | 730.10 |
| 26 | 13 | 142.46 | 66.87  | 1.39   | 0.37   | 37.16  |
| 26 | 14 | 591.05 | 6.34   | 29.64  | 5.38   | 2.63   |
| 26 | 15 | 119.59 | 47.21  | 16.22  | 0.35   | 7.91   |
| 26 | 16 | 13.99  | 7.81   | 0.72   | 2.51   | 23.71  |
| 26 | 17 | 29.51  | 2.09   | 7.00   | 1.35   | 2.30   |
| 26 | 18 | 4.41   | 3.05   | 1.01   | 5.59   | 9.84   |
| 26 | 19 | 147.94 | 6.57   | 35.88  | 4.76   | 2.26   |
| 26 | 20 | 26.72  | 4.72   | 10.48  | 0.29   | 0.48   |
| 26 | 21 | 64.86  | 14.03  | 5.07   | 4.12   | 2.05   |
| 26 | 22 | 96.19  | 4.26   | 1.29   | 0.19   | 7.44   |
| 26 | 23 | 11.43  | 2.35   | 4.83   | 1.80   | 1.45   |
| 26 | 24 | 156.16 | 2.40   | 6.49   | 4.70   | 7.84   |
| 26 | 25 | 132.60 | 3.34   | 2.94   | 4.04   | 1.94   |
| 26 | 26 | 16.27  | 10.66  | 6.13   | 1.69   | 4.16   |



|    |    |        |        |        |        |        |
|----|----|--------|--------|--------|--------|--------|
| 26 | 27 | 15.82  | 3.11   | 1.00   | 3.89   | 3.07   |
| 26 | 28 | 68.78  | 10.49  | 3.27   | 3.49   | 2.08   |
| 26 | 29 | 25.04  | 4.34   | 0.28   | 0.91   | 2.11   |
| 26 | 30 | 25.04  | 46.43  | 17.23  | 1.01   | 1.77   |
| 27 | 0  | 123.67 | 5.77   | 245.90 | 172.42 | 25.79  |
| 27 | 1  | 3.56   | 144.63 | 4.45   | 1.22   | 1.51   |
| 27 | 2  | 13.96  | 1.61   | 7.97   | 1.20   | 0.27   |
| 27 | 3  | 6.54   | 12.34  | 3.35   | 0.61   | 10.30  |
| 27 | 4  | 1.14   | 129.58 | 4.15   | 2.70   | 5.57   |
| 27 | 5  | 6.93   | 11.08  | 315.69 | 113.44 | 61.99  |
| 27 | 6  | 4.06   | 1.38   | 324.75 | 130.86 | 1.63   |
| 27 | 7  | 1.83   | 1.36   | 57.48  | 428.56 | 453.91 |
| 27 | 8  | 1.29   | 19.93  | 2.55   | 6.92   | 442.12 |
| 27 | 9  | 169.56 | 6.11   | 7.76   | 5.63   | 215.97 |
| 27 | 10 | 3.24   | 15.01  | 4.15   | 3.37   | 19.79  |
| 27 | 11 | 17.17  | 21.29  | 314.82 | 139.93 | 27.52  |
| 27 | 12 | 5.95   | 121.56 | 68.04  | 173.24 | 10.91  |
| 27 | 13 | 14.16  | 12.65  | 11.86  | 4.74   | 4.48   |
| 27 | 14 | 44.94  | 1.40   | 297.15 | 23.44  | 2.51   |
| 27 | 15 | 5.25   | 2.79   | 50.33  | 2.68   | 30.71  |
| 27 | 16 | 1.53   | 0.64   | 3.11   | 117.11 | 34.59  |
| 27 | 17 | 3.81   | 1.26   | 53.80  | 13.41  | 2.60   |
| 27 | 18 | 4.58   | 0.38   | 4.78   | 205.02 | 40.68  |
| 27 | 19 | 122.39 | 1.43   | 253.06 | 197.93 | 11.07  |
| 27 | 20 | 16.02  | 1.38   | 48.77  | 7.90   | 0.95   |
| 27 | 21 | 26.66  | 1.75   | 18.79  | 42.89  | 2.27   |
| 27 | 22 | 41.83  | 1.46   | 5.55   | 5.04   | 9.05   |
| 27 | 23 | 3.61   | 0.28   | 35.42  | 77.62  | 9.26   |
| 27 | 24 | 18.11  | 0.74   | 38.84  | 11.55  | 6.67   |
| 27 | 25 | 4.16   | 1.13   | 20.60  | 19.18  | 7.10   |
| 27 | 26 | 9.78   | 0.67   | 41.50  | 7.68   | 5.60   |
| 27 | 27 | 3.60   | 0.44   | 4.40   | 30.95  | 2.15   |
| 27 | 28 | 6.04   | 1.03   | 36.12  | 9.67   | 0.72   |
| 27 | 29 | 3.59   | 0.70   | 1.45   | 8.77   | 13.28  |
| 27 | 30 | 2.97   | 3.78   | 200.27 | 7.87   | 1.68   |
| 28 | 0  | 37.92  | 6.43   | 213.06 | 164.52 | 22.28  |
| 28 | 1  | 5.87   | 0.05   | 2.54   | 3.23   | 11.56  |
| 28 | 2  | 121.88 | 0.18   | 4.26   | 2.75   | 0.54   |
| 28 | 3  | 7.29   | 0.08   | 0.48   | 0.46   | 10.36  |
| 28 | 4  | 3.88   | 0.32   | 2.00   | 2.58   | 4.42   |
| 28 | 5  | 56.20  | 0.38   | 228.50 | 151.82 | 40.90  |
| 28 | 6  | 3.06   | 19.89  | 625.42 | 63.33  | 7.84   |
| 28 | 7  | 5.31   | 0.27   | 116.72 | 215.56 | 33.82  |
| 28 | 8  | 4.19   | 1.32   | 0.73   | 3.20   | 37.27  |

|    |    |        |        |        |        |        |
|----|----|--------|--------|--------|--------|--------|
| 28 | 9  | 106.27 | 2.55   | 4.44   | 5.77   | 107.81 |
| 28 | 10 | 21.02  | 2.10   | 2.16   | 1.15   | 12.88  |
| 28 | 11 | 171.91 | 0.43   | 247.93 | 309.28 | 11.12  |
| 28 | 12 | 12.86  | 0.95   | 86.03  | 124.60 | 9.02   |
| 28 | 13 | 28.11  | 4.59   | 6.10   | 9.85   | 2.06   |
| 28 | 14 | 24.04  | 3.65   | 273.24 | 132.96 | 10.95  |
| 28 | 15 | 10.89  | 1.28   | 206.51 | 6.50   | 17.65  |
| 28 | 16 | 0.85   | 3.58   | 3.11   | 103.48 | 9.97   |
| 28 | 17 | 1.09   | 0.16   | 69.53  | 19.21  | 46.60  |
| 28 | 18 | 2.86   | 2.82   | 3.87   | 95.71  | 24.41  |
| 28 | 19 | 78.39  | 8.06   | 448.27 | 97.67  | 4.89   |
| 28 | 20 | 11.93  | 1.67   | 74.74  | 1.84   | 4.54   |
| 28 | 21 | 18.49  | 16.69  | 37.03  | 29.14  | 11.57  |
| 28 | 22 | 32.03  | 4.22   | 3.40   | 4.24   | 78.10  |
| 28 | 23 | 7.45   | 1.24   | 28.66  | 36.19  | 35.12  |
| 28 | 24 | 9.78   | 1.89   | 65.34  | 30.03  | 3.54   |
| 28 | 25 | 2.65   | 1.23   | 30.68  | 12.94  | 16.75  |
| 28 | 26 | 7.28   | 0.94   | 15.46  | 6.08   | 12.32  |
| 28 | 27 | 8.07   | 1.79   | 12.87  | 51.06  | 4.54   |
| 28 | 28 | 5.86   | 1.91   | 24.44  | 14.06  | 4.26   |
| 28 | 29 | 2.79   | 1.61   | 1.32   | 8.33   | 2.68   |
| 28 | 30 | 2.38   | 14.34  | 103.30 | 14.43  | 2.48   |
| 29 | 0  | 241.08 | 184.77 | 221.34 | 107.88 | 7.37   |
| 29 | 1  | 2.72   | 2.55   | 7.73   | 14.12  | 124.20 |
| 29 | 2  | 24.95  | 9.41   | 5.85   | 11.65  | 5.86   |
| 29 | 3  | 5.85   | 25.72  | 4.34   | 7.82   | 1.59   |
| 29 | 4  | 1.27   | 7.70   | 5.22   | 11.18  | 1.89   |
| 29 | 5  | 5.39   | 8.26   | 585.98 | 687.86 | 18.58  |
| 29 | 6  | 2.33   | 606.20 | 39.84  | 49.73  | 77.61  |
| 29 | 7  | 3.51   | 4.34   | 3.01   | 109.42 | 5.93   |
| 29 | 8  | 4.68   | 1.78   | 2.90   | 4.85   | 6.37   |
| 29 | 9  | 682.54 | 70.22  | 5.37   | 8.59   | 2.85   |
| 29 | 10 | 6.77   | 2.84   | 3.98   | 4.28   | 7.00   |
| 29 | 11 | 31.95  | 24.08  | 476.10 | 147.94 | 0.59   |
| 29 | 12 | 13.61  | 4.80   | 44.53  | 296.61 | 2.36   |
| 29 | 13 | 51.71  | 9.15   | 27.65  | 46.99  | 10.49  |
| 29 | 14 | 211.71 | 2.33   | 516.56 | 569.52 | 123.57 |
| 29 | 15 | 44.02  | 5.35   | 26.65  | 15.79  | 2.89   |
| 29 | 16 | 3.41   | 144.20 | 2.57   | 30.55  | 14.18  |
| 29 | 17 | 12.37  | 2.52   | 37.43  | 81.42  | 4.25   |
| 29 | 18 | 19.00  | 58.81  | 7.82   | 68.09  | 8.49   |
| 29 | 19 | 469.31 | 205.38 | 39.20  | 63.27  | 0.72   |
| 29 | 20 | 74.18  | 41.88  | 10.49  | 10.42  | 0.28   |
| 29 | 21 | 114.05 | 385.14 | 11.29  | 27.05  | 1.01   |

|    |    |        |        |       |        |        |
|----|----|--------|--------|-------|--------|--------|
| 29 | 22 | 172.20 | 32.79  | 7.53  | 4.79   | 2.26   |
| 29 | 23 | 9.75   | 2.59   | 24.91 | 14.68  | 0.74   |
| 29 | 24 | 74.62  | 40.51  | 36.68 | 29.10  | 0.60   |
| 29 | 25 | 49.61  | 28.11  | 13.55 | 27.67  | 2.42   |
| 29 | 26 | 2.53   | 6.40   | 46.78 | 14.50  | 3.99   |
| 29 | 27 | 8.56   | 36.99  | 11.43 | 19.97  | 0.43   |
| 29 | 28 | 11.09  | 4.61   | 26.19 | 30.35  | 0.98   |
| 29 | 29 | 2.43   | 4.44   | 1.86  | 10.07  | 0.51   |
| 29 | 30 | 6.24   | 19.25  | 72.41 | 7.02   | 0.30   |
| 30 | 0  | 42.82  | 36.40  | 36.84 | 164.60 | 284.64 |
| 30 | 1  | 1.24   | 1.09   | 0.30  | 4.44   | 2.21   |
| 30 | 2  | 5.01   | 1.75   | 0.47  | 3.81   | 0.79   |
| 30 | 3  | 6.79   | 2.11   | 0.21  | 2.36   | 36.71  |
| 30 | 4  | 1.52   | 2.21   | 0.39  | 3.82   | 65.82  |
| 30 | 5  | 1.13   | 1.48   | 7.78  | 203.88 | 682.68 |
| 30 | 6  | 3.03   | 120.04 | 67.52 | 55.68  | 2.06   |
| 30 | 7  | 2.28   | 2.93   | 12.65 | 163.73 | 33.95  |
| 30 | 8  | 0.81   | 0.66   | 1.51  | 3.33   | 82.91  |
| 30 | 9  | 31.97  | 48.37  | 0.64  | 4.01   | 262.25 |
| 30 | 10 | 1.06   | 2.20   | 0.52  | 3.77   | 31.67  |
| 30 | 11 | 7.05   | 5.83   | 34.94 | 146.50 | 25.53  |
| 30 | 12 | 7.55   | 2.47   | 10.49 | 54.43  | 46.18  |
| 30 | 13 | 1.90   | 2.14   | 0.34  | 15.20  | 4.59   |
| 30 | 14 | 6.68   | 1.00   | 12.95 | 190.38 | 17.51  |
| 30 | 15 | 4.13   | 1.04   | 24.57 | 4.42   | 99.16  |
| 30 | 16 | 0.63   | 32.33  | 0.42  | 40.19  | 486.44 |
| 30 | 17 | 0.96   | 2.58   | 9.23  | 24.90  | 28.31  |
| 30 | 18 | 1.62   | 51.95  | 0.50  | 94.62  | 260.92 |
| 30 | 19 | 22.18  | 44.69  | 58.14 | 92.49  | 20.73  |
| 30 | 20 | 4.14   | 7.63   | 8.35  | 4.24   | 11.80  |
| 30 | 21 | 8.34   | 79.33  | 4.15  | 31.69  | 4.07   |
| 30 | 22 | 10.95  | 7.31   | 0.80  | 2.43   | 43.83  |
| 30 | 23 | 4.19   | 0.55   | 6.62  | 30.27  | 20.82  |
| 30 | 24 | 9.94   | 8.23   | 9.81  | 23.52  | 4.70   |
| 30 | 25 | 4.89   | 14.78  | 4.12  | 23.20  | 8.08   |
| 30 | 26 | 3.06   | 3.29   | 1.37  | 11.78  | 51.38  |
| 30 | 27 | 3.98   | 7.40   | 3.24  | 28.75  | 12.72  |
| 30 | 28 | 2.48   | 6.21   | 7.52  | 17.16  | 16.44  |
| 30 | 29 | 2.13   | 4.98   | 0.91  | 4.94   | 3.19   |
| 30 | 30 | 2.73   | 22.18  | 13.53 | 6.06   | 7.56   |

175

176

**Table S4.** Coordinate of Conformer 1.

| Element | X /Bohr | Y /Bohr | Z /Bohr |
|---------|---------|---------|---------|
|---------|---------|---------|---------|

---

|    |           |           |           |
|----|-----------|-----------|-----------|
| Ir | -2.608552 | -0.038520 | 0.161827  |
| O  | -1.992924 | -2.042790 | -0.520425 |
| O  | -1.030308 | -0.293498 | 1.703937  |
| C  | -1.154334 | -2.814900 | 0.030110  |
| C  | -0.301769 | -1.315987 | 1.878102  |
| C  | -0.331071 | -2.512174 | 1.133658  |
| C  | -1.068922 | -4.187428 | -0.575927 |
| C  | 0.672464  | -1.219440 | 3.020157  |
| H  | 0.190841  | -0.758041 | 3.893448  |
| H  | 1.099384  | -2.188965 | 3.308332  |
| H  | 1.492060  | -0.553801 | 2.711055  |
| H  | -0.337765 | -4.839230 | -0.082036 |
| H  | -2.059412 | -4.662865 | -0.534666 |
| H  | -0.809115 | -4.106961 | -1.640896 |
| H  | 0.349919  | -3.302046 | 1.460234  |
| C  | -2.420323 | 2.842436  | -0.063431 |
| C  | -2.653326 | 4.202320  | 0.190395  |
| C  | -3.531245 | 4.585907  | 1.196883  |
| C  | -4.181500 | 3.602707  | 1.950704  |
| C  | -3.959689 | 2.249714  | 1.699391  |
| H  | -3.712424 | 5.644647  | 1.395572  |
| H  | -2.134412 | 4.967770  | -0.395115 |
| H  | -4.875955 | 3.899009  | 2.742411  |
| H  | -4.494235 | 1.506183  | 2.299361  |
| C  | -1.482568 | 2.363049  | -1.065670 |
| C  | -0.750906 | 3.156199  | -1.955834 |
| C  | 0.143478  | 2.563331  | -2.837049 |
| H  | -0.888583 | 4.238365  | -1.944032 |
| C  | -0.446127 | 0.434394  | -1.917546 |
| C  | 0.313250  | 1.179416  | -2.810058 |
| H  | 0.720013  | 3.178901  | -3.532557 |
| H  | -0.363152 | -0.653451 | -1.853789 |
| H  | 1.035724  | 0.671341  | -3.447372 |
| C  | -5.202856 | -1.256788 | 0.702034  |
| C  | -6.213423 | -1.938742 | 1.393689  |
| C  | -6.012290 | -2.340342 | 2.705956  |
| C  | -4.794951 | -2.052881 | 3.328038  |
| C  | -3.824040 | -1.380057 | 2.601722  |
| H  | -6.800260 | -2.870610 | 3.245399  |
| H  | -7.158541 | -2.144589 | 0.889521  |
| H  | -4.595841 | -2.343482 | 4.360008  |
| H  | -2.853081 | -1.113796 | 3.026901  |
| C  | -5.285155 | -0.747762 | -0.656858 |
| C  | -6.419876 | -0.899734 | -1.469399 |

---

---

|    |           |           |           |
|----|-----------|-----------|-----------|
| C  | -6.440876 | -0.361595 | -2.749006 |
| H  | -7.294731 | -1.442235 | -1.098892 |
| C  | -4.190642 | 0.489633  | -2.418893 |
| C  | -5.321966 | 0.335830  | -3.217399 |
| H  | -7.323395 | -0.479702 | -3.381457 |
| H  | -3.334248 | 1.040241  | -2.820265 |
| H  | -5.334988 | 0.765928  | -4.223118 |
| C  | -4.134645 | -0.051917 | -1.124875 |
| C  | -3.074391 | 1.830976  | 0.693274  |
| N  | -4.016391 | -0.999332 | 1.329162  |
| N  | -1.330916 | 1.004408  | -1.085830 |
| Al | 3.337926  | -0.151932 | -0.511591 |
| N  | 4.536705  | 0.331080  | 1.147274  |
| N  | 3.143629  | -2.092224 | 0.129314  |
| C  | 4.209202  | 0.770668  | 2.354102  |
| C  | 5.840437  | 0.109482  | 0.847084  |
| N  | 3.358341  | 1.802135  | -1.094533 |
| O  | 1.854598  | 0.403858  | 0.482037  |
| O  | 2.482474  | -0.787674 | -2.031062 |
| O  | 5.028721  | -0.487681 | -1.260382 |
| C  | 3.456437  | -2.688149 | 1.268759  |
| C  | 2.654159  | -2.830340 | -0.899591 |
| C  | 5.182006  | 1.007347  | 3.343519  |
| H  | 3.145554  | 0.940609  | 2.544213  |
| C  | 6.897998  | 0.314588  | 1.778549  |
| C  | 6.068850  | -0.349031 | -0.494195 |
| C  | 4.137284  | 2.432537  | -1.960222 |
| C  | 2.446380  | 2.497649  | -0.370241 |
| C  | 1.638329  | 1.692491  | 0.500227  |
| C  | 2.308505  | -2.075549 | -2.072108 |
| C  | 3.311622  | -4.076119 | 1.445777  |
| H  | 3.839543  | -2.053333 | 2.073833  |
| C  | 2.498660  | -4.243684 | -0.830284 |
| C  | 6.513590  | 0.777964  | 3.059506  |
| H  | 4.869392  | 1.370121  | 4.323705  |
| C  | 8.220991  | 0.046617  | 1.358630  |
| C  | 7.394673  | -0.599098 | -0.858381 |
| C  | 4.045431  | 3.824070  | -2.147514 |
| H  | 4.853826  | 1.813793  | -2.508028 |
| C  | 2.302928  | 3.910417  | -0.461007 |
| C  | 0.710947  | 2.357281  | 1.305278  |
| C  | 1.806300  | -2.792722 | -3.160690 |
| C  | 2.846240  | -4.848407 | 0.400508  |
| H  | 3.580021  | -4.524602 | 2.403478  |

---

|   |           |           |           |
|---|-----------|-----------|-----------|
| C | 2.011814  | -4.923633 | -1.970212 |
| C | 8.437442  | -0.399664 | 0.064806  |
| H | 7.604050  | -0.952081 | -1.869853 |
| C | 3.144818  | 4.556323  | -1.396329 |
| H | 4.698359  | 4.311091  | -2.873283 |
| C | 1.346221  | 4.537227  | 0.371815  |
| C | 0.588339  | 3.758585  | 1.231526  |
| H | 0.056610  | 1.768051  | 1.952612  |
| C | 1.679116  | -4.192663 | -3.097789 |
| H | 1.530742  | -2.249741 | -4.067325 |
| H | 9.461333  | -0.607024 | -0.258269 |
| H | -0.155923 | 4.241849  | 1.870939  |
| H | 1.294144  | -4.717945 | -3.976236 |
| H | 1.888854  | -6.008202 | -1.942015 |
| H | 1.217488  | 5.621184  | 0.328675  |
| H | 9.050924  | 0.194055  | 2.052366  |
| H | 7.280985  | 0.954804  | 3.818477  |
| H | 2.740272  | -5.931142 | 0.514729  |
| H | 3.076274  | 5.641201  | -1.519183 |

177

178

**Table S5.** Coordinate of Conformer 2.

| Element | X /Bohr   | Y /Bohr   | Z /Bohr   |
|---------|-----------|-----------|-----------|
| Ir      | -2.600548 | -0.718232 | -0.563740 |
| O       | -3.123146 | -1.846751 | -2.402740 |
| O       | -0.672877 | -1.816528 | -0.699985 |
| C       | -2.433897 | -2.737125 | -2.978763 |
| C       | -0.363525 | -2.729887 | -1.524591 |
| C       | -1.146815 | -3.183089 | -2.604602 |
| C       | -3.080564 | -3.362783 | -4.184474 |
| C       | 0.971211  | -3.380081 | -1.283483 |
| H       | 1.757486  | -2.614221 | -1.199377 |
| H       | 0.958462  | -3.895693 | -0.310298 |
| H       | 1.253931  | -4.099507 | -2.061187 |
| H       | -3.325986 | -2.583159 | -4.919648 |
| H       | -2.458706 | -4.124707 | -4.668637 |
| H       | -4.038580 | -3.815918 | -3.893350 |
| H       | -0.712937 | -3.977302 | -3.215433 |
| C       | -1.167590 | 1.489986  | 0.620520  |
| C       | -0.589782 | 2.314828  | 1.595337  |
| C       | -0.798486 | 2.056702  | 2.942361  |
| C       | -1.607276 | 0.978219  | 3.316608  |
| C       | -2.190456 | 0.154983  | 2.353010  |
| H       | -0.336372 | 2.695979  | 3.699159  |

---

|    |           |           |           |
|----|-----------|-----------|-----------|
| H  | 0.036845  | 3.157480  | 1.297134  |
| H  | -1.787945 | 0.778583  | 4.377101  |
| H  | -2.824673 | -0.676123 | 2.679331  |
| C  | -1.018617 | 1.721289  | -0.804255 |
| C  | -0.265709 | 2.741180  | -1.405305 |
| C  | -0.266533 | 2.880548  | -2.784861 |
| H  | 0.341816  | 3.393765  | -0.777589 |
| C  | -1.724944 | 0.988156  | -2.925052 |
| C  | -1.025827 | 2.001502  | -3.562986 |
| H  | 0.325481  | 3.668971  | -3.255559 |
| H  | -2.322661 | 0.253150  | -3.471451 |
| H  | -1.063242 | 2.084535  | -4.649953 |
| C  | -4.846824 | -2.051016 | 0.732669  |
| C  | -5.558847 | -3.026824 | 1.443552  |
| C  | -4.900333 | -4.133684 | 1.958579  |
| C  | -3.522424 | -4.260596 | 1.763688  |
| C  | -2.862442 | -3.274701 | 1.046201  |
| H  | -5.454237 | -4.892357 | 2.515831  |
| H  | -6.631764 | -2.899401 | 1.593842  |
| H  | -2.963385 | -5.109176 | 2.159515  |
| H  | -1.784853 | -3.306205 | 0.862894  |
| C  | -5.383671 | -0.815223 | 0.189936  |
| C  | -6.734737 | -0.446617 | 0.290187  |
| C  | -7.164309 | 0.775529  | -0.208745 |
| H  | -7.455667 | -1.119112 | 0.764649  |
| C  | -4.894908 | 1.281043  | -0.909783 |
| C  | -6.236662 | 1.639296  | -0.803006 |
| H  | -8.215096 | 1.062581  | -0.130955 |
| H  | -4.191927 | 1.980788  | -1.372170 |
| H  | -6.569075 | 2.608735  | -1.185384 |
| C  | -4.434053 | 0.043973  | -0.433073 |
| C  | -1.970060 | 0.374208  | 0.984467  |
| N  | -3.502976 | -2.209674 | 0.538169  |
| N  | -1.710000 | 0.840691  | -1.590207 |
| Al | 3.309094  | 1.171778  | 0.482778  |
| N  | 4.158628  | -0.715084 | 0.756079  |
| N  | 3.969173  | 1.794384  | 2.323515  |
| C  | 5.369782  | -1.166410 | 0.466205  |
| C  | 3.243520  | -1.547219 | 1.314506  |
| N  | 2.762356  | 0.660639  | -1.400828 |
| O  | 4.883895  | 1.741683  | -0.366246 |
| O  | 2.475920  | 2.840045  | 0.445237  |
| O  | 1.828388  | 0.306654  | 1.228906  |
| C  | 4.722604  | 1.206846  | 3.239506  |

---

|   |           |           |           |
|---|-----------|-----------|-----------|
| C | 3.437187  | 3.017950  | 2.576569  |
| C | 5.739530  | -2.499537 | 0.729138  |
| H | 6.062426  | -0.446231 | 0.020531  |
| C | 3.522023  | -2.910054 | 1.623454  |
| C | 1.967208  | -0.940540 | 1.564771  |
| C | 1.678869  | 0.032132  | -1.830853 |
| C | 3.726157  | 1.039696  | -2.276059 |
| C | 4.875856  | 1.648482  | -1.666551 |
| C | 2.636176  | 3.561852  | 1.514541  |
| C | 4.992176  | 1.812615  | 4.479822  |
| H | 5.130249  | 0.222525  | 2.991629  |
| C | 3.650898  | 3.712623  | 3.801270  |
| C | 4.825311  | -3.361102 | 1.303658  |
| H | 6.746100  | -2.835787 | 0.475931  |
| C | 2.495005  | -3.682922 | 2.210896  |
| C | 0.982659  | -1.748805 | 2.140690  |
| C | 1.499176  | -0.257429 | -3.197767 |
| H | 0.943361  | -0.263504 | -1.075120 |
| C | 3.619722  | 0.821622  | -3.676698 |
| C | 5.895959  | 2.062682  | -2.525889 |
| C | 2.076409  | 4.824138  | 1.729886  |
| C | 4.459199  | 3.054536  | 4.758137  |
| H | 5.617512  | 1.291047  | 5.205680  |
| C | 3.052484  | 4.982559  | 3.969856  |
| C | 1.263716  | -3.089576 | 2.453659  |
| H | -0.003849 | -1.317443 | 2.323436  |
| C | 2.453651  | 0.144280  | -4.110880 |
| H | 0.604340  | -0.799827 | -3.511999 |
| C | 4.680670  | 1.263272  | -4.502090 |
| C | 5.779451  | 1.869784  | -3.916050 |
| H | 6.783516  | 2.535993  | -2.101425 |
| C | 2.288656  | 5.507201  | 2.941034  |
| H | 1.469239  | 5.272419  | 0.940197  |
| H | 0.468869  | -3.690497 | 2.906930  |
| H | 6.599243  | 2.209103  | -4.555428 |
| H | 1.828323  | 6.490570  | 3.069517  |
| H | 3.201849  | 5.531855  | 4.901328  |
| H | 4.626278  | 1.114514  | -5.582409 |
| H | 2.680105  | -4.728625 | 2.465213  |
| H | 5.100443  | -4.398358 | 1.515585  |
| H | 4.655963  | 3.540707  | 5.717784  |
| H | 2.324356  | -0.067291 | -5.176411 |

179

180

**Table S6.** Coordinate of Conformer 3.



| Element | X /Bohr   | Y /Bohr   | Z /Bohr   |
|---------|-----------|-----------|-----------|
| Ir      | -3.051723 | 0.166898  | 1.433172  |
| O       | -2.026977 | -1.532295 | 2.450417  |
| O       | -4.792949 | -1.208605 | 1.367379  |
| C       | -2.539462 | -2.646547 | 2.777871  |
| C       | -4.883334 | -2.362620 | 1.874647  |
| C       | -3.858249 | -3.073706 | 2.536774  |
| C       | -1.615050 | -3.576082 | 3.519424  |
| C       | -6.230375 | -3.018027 | 1.735549  |
| H       | -6.511186 | -3.065985 | 0.674033  |
| H       | -6.272169 | -4.026975 | 2.161976  |
| H       | -6.992667 | -2.393469 | 2.222313  |
| H       | -2.078721 | -4.533512 | 3.783760  |
| H       | -0.714696 | -3.774391 | 2.919753  |
| H       | -1.263226 | -3.090130 | 4.441871  |
| H       | -4.118821 | -4.067923 | 2.904579  |
| C       | -4.914482 | 2.360089  | 1.678182  |
| C       | -5.779575 | 3.402532  | 1.309216  |
| C       | -5.894824 | 3.776709  | -0.022701 |
| C       | -5.137397 | 3.108190  | -0.990799 |
| C       | -4.277965 | 2.071165  | -0.634369 |
| H       | -6.567029 | 4.587990  | -0.310057 |
| H       | -6.366542 | 3.926996  | 2.068971  |
| H       | -5.219297 | 3.404169  | -2.040620 |
| H       | -3.698858 | 1.573045  | -1.417811 |
| C       | -4.715805 | 1.934056  | 3.053092  |
| C       | -5.319137 | 2.492160  | 4.188547  |
| C       | -5.010797 | 2.008893  | 5.451443  |
| H       | -6.027064 | 3.312908  | 4.066286  |
| C       | -3.524321 | 0.442534  | 4.423519  |
| C       | -4.091344 | 0.964519  | 5.576104  |
| H       | -5.478952 | 2.445332  | 6.336471  |
| H       | -2.790682 | -0.367109 | 4.449349  |
| H       | -3.813954 | 0.557999  | 6.549121  |
| C       | -1.155962 | 0.258712  | -0.792386 |
| C       | -0.556619 | -0.052031 | -2.021539 |
| C       | -1.086081 | -1.062164 | -2.810883 |
| C       | -2.217965 | -1.754910 | -2.370722 |
| C       | -2.779206 | -1.402212 | -1.152382 |
| H       | -0.606744 | -1.317106 | -3.759155 |
| H       | 0.351272  | 0.475230  | -2.325859 |
| H       | -2.665689 | -2.556507 | -2.959393 |
| H       | -3.672956 | -1.892004 | -0.758068 |
| C       | -0.679744 | 1.242946  | 0.163151  |

---

|    |           |           |           |
|----|-----------|-----------|-----------|
| C  | 0.473394  | 2.017693  | -0.040903 |
| C  | 0.901174  | 2.894535  | 0.948533  |
| H  | 1.057532  | 1.910174  | -0.960050 |
| C  | -0.974942 | 2.236111  | 2.344049  |
| C  | 0.177143  | 2.995723  | 2.140239  |
| H  | 1.807764  | 3.485720  | 0.799242  |
| H  | -1.526955 | 2.352192  | 3.282522  |
| H  | 0.518495  | 3.679296  | 2.923688  |
| C  | -1.433998 | 1.341483  | 1.365502  |
| C  | -4.149087 | 1.662295  | 0.701999  |
| N  | -2.265921 | -0.427091 | -0.384281 |
| N  | -3.828311 | 0.905231  | 3.200865  |
| Al | 3.718204  | -0.271165 | -1.884116 |
| N  | 2.542404  | -0.812209 | -0.320344 |
| N  | 5.083111  | -1.783734 | -1.480872 |
| C  | 1.528673  | -1.664089 | -0.251563 |
| C  | 2.872908  | -0.070129 | 0.768966  |
| N  | 4.917044  | 0.486253  | -3.381394 |
| O  | 2.519203  | 1.018590  | -2.497130 |
| O  | 2.993944  | -1.600203 | -3.000942 |
| O  | 4.553981  | 0.806355  | -0.606709 |
| C  | 6.130599  | -1.796821 | -0.669932 |
| C  | 4.765128  | -2.893050 | -2.192196 |
| C  | 0.755901  | -1.796047 | 0.913049  |
| H  | 1.311999  | -2.236636 | -1.157823 |
| C  | 2.162310  | -0.148063 | 1.997264  |
| C  | 3.985027  | 0.813351  | 0.571501  |
| C  | 6.137178  | 0.169342  | -3.784312 |
| C  | 4.243208  | 1.484046  | -4.010346 |
| C  | 2.930018  | 1.748130  | -3.494030 |
| C  | 3.604476  | -2.747802 | -3.025713 |
| C  | 6.935194  | -2.943469 | -0.530125 |
| H  | 6.333620  | -0.869330 | -0.126558 |
| C  | 5.514928  | -4.100602 | -2.119891 |
| C  | 1.058852  | -1.032845 | 2.024545  |
| H  | -0.107269 | -2.463451 | 0.914834  |
| C  | 2.589654  | 0.672143  | 3.067947  |
| C  | 4.373351  | 1.592523  | 1.661803  |
| C  | 6.764624  | 0.835068  | -4.852782 |
| H  | 6.644063  | -0.638472 | -3.248288 |
| C  | 4.791430  | 2.218126  | -5.100913 |
| C  | 2.198006  | 2.767778  | -4.105227 |
| C  | 3.230311  | -3.861585 | -3.782271 |
| C  | 6.630706  | -4.083096 | -1.248708 |

---

|   |          |           |           |
|---|----------|-----------|-----------|
| H | 7.790434 | -2.917972 | 0.146755  |
| C | 5.093077 | -5.196905 | -2.906747 |
| C | 3.675341 | 1.509566  | 2.883329  |
| H | 5.219076 | 2.273927  | 1.547871  |
| C | 6.096381 | 1.850658  | -5.505679 |
| H | 7.771335 | 0.538976  | -5.150900 |
| C | 4.008161 | 3.239267  | -5.686420 |
| C | 2.743205 | 3.490353  | -5.181872 |
| H | 1.197042 | 2.995722  | -3.732054 |
| C | 3.973281 | -5.054562 | -3.710572 |
| H | 2.353199 | -3.788303 | -4.428291 |
| H | 4.003555 | 2.143833  | 3.711683  |
| H | 2.139101 | 4.281422  | -5.634281 |
| H | 3.648049 | -5.903765 | -4.317913 |
| H | 5.648275 | -6.136229 | -2.871982 |
| H | 4.408100 | 3.815050  | -6.523268 |
| H | 2.048984 | 0.644183  | 4.016188  |
| H | 0.426909 | -1.099642 | 2.914267  |
| H | 7.247355 | -4.980994 | -1.149739 |
| H | 6.567846 | 2.379670  | -6.338648 |

181

182

183

**Table S7.** Coordinate of Conformer 4.

| Element | X /Bohr   | Y /Bohr   | Z /Bohr   |
|---------|-----------|-----------|-----------|
| Ir      | -3.408430 | 0.065717  | 0.552295  |
| O       | -4.772809 | -1.198217 | 1.758097  |
| O       | -2.531222 | 0.624138  | 2.527146  |
| C       | -4.832920 | -1.283892 | 3.017789  |
| C       | -2.951182 | 0.272330  | 3.672771  |
| C       | -4.007032 | -0.615361 | 3.948204  |
| C       | -5.902275 | -2.201622 | 3.544281  |
| C       | -2.230805 | 0.903153  | 4.835647  |
| H       | -2.619087 | 0.588086  | 5.811134  |
| H       | -1.156620 | 0.668966  | 4.794049  |
| H       | -2.305046 | 1.998661  | 4.765182  |
| H       | -6.883394 | -1.871475 | 3.175308  |
| H       | -5.751870 | -3.213153 | 3.140980  |
| H       | -5.931919 | -2.256507 | 4.638623  |
| H       | -4.216730 | -0.803316 | 5.002853  |
| C       | -0.933750 | 0.305436  | -0.934002 |
| C       | 0.082135  | 0.862514  | -1.724813 |
| C       | 0.011116  | 2.199514  | -2.099845 |
| C       | -1.076234 | 2.976798  | -1.687186 |

---

|    |           |           |           |
|----|-----------|-----------|-----------|
| C  | -2.096093 | 2.422757  | -0.913039 |
| H  | 0.805090  | 2.635531  | -2.711227 |
| H  | 0.949127  | 0.265140  | -2.024438 |
| H  | -1.135518 | 4.028303  | -1.984569 |
| H  | -2.944756 | 3.051909  | -0.625371 |
| C  | -0.922354 | -1.075481 | -0.481295 |
| C  | 0.075506  | -2.019983 | -0.755462 |
| C  | -0.058840 | -3.318041 | -0.286254 |
| H  | 0.959796  | -1.715539 | -1.321253 |
| C  | -2.135341 | -2.685249 | 0.723260  |
| C  | -1.186860 | -3.662717 | 0.462143  |
| H  | 0.720278  | -4.055200 | -0.493850 |
| H  | -3.042426 | -2.890374 | 1.297124  |
| H  | -1.332379 | -4.672823 | 0.847083  |
| C  | -5.784060 | 1.516553  | -0.319412 |
| C  | -6.820952 | 2.459736  | -0.319042 |
| C  | -6.875331 | 3.437315  | 0.663147  |
| C  | -5.882685 | 3.471752  | 1.645741  |
| C  | -4.880532 | 2.514187  | 1.606495  |
| H  | -7.682048 | 4.173606  | 0.662556  |
| H  | -7.578649 | 2.418036  | -1.102517 |
| H  | -5.880444 | 4.227154  | 2.432116  |
| H  | -4.068613 | 2.489363  | 2.337627  |
| C  | -5.580653 | 0.468512  | -1.305396 |
| C  | -6.433765 | 0.261239  | -2.401216 |
| C  | -6.154167 | -0.734998 | -3.326724 |
| H  | -7.322436 | 0.885273  | -2.534245 |
| C  | -4.160469 | -1.328805 | -2.074522 |
| C  | -5.011178 | -1.524780 | -3.160029 |
| H  | -6.817610 | -0.895288 | -4.179212 |
| H  | -3.273945 | -1.962787 | -1.978710 |
| H  | -4.781312 | -2.304512 | -3.891882 |
| C  | -4.425299 | -0.340083 | -1.113869 |
| C  | -2.056017 | 1.076543  | -0.518496 |
| N  | -4.833306 | 1.561654  | 0.661914  |
| N  | -2.008275 | -1.428409 | 0.269621  |
| Al | 4.280861  | -0.216600 | -0.629620 |
| N  | 5.771683  | 0.367240  | 0.675264  |
| N  | 5.599927  | -1.344097 | -1.738589 |
| C  | 6.211970  | -0.213258 | 1.781872  |
| C  | 6.327524  | 1.529594  | 0.253651  |
| N  | 2.816982  | 0.681304  | 0.446528  |
| O  | 3.901959  | -1.684391 | 0.471047  |
| O  | 3.075407  | -0.703927 | -1.973306 |

---

---

|   |           |           |           |
|---|-----------|-----------|-----------|
| O | 4.778877  | 1.379654  | -1.488857 |
| C | 6.880954  | -1.629564 | -1.567694 |
| C | 4.939554  | -1.846459 | -2.814160 |
| C | 7.258214  | 0.348882  | 2.537315  |
| H | 5.722435  | -1.149826 | 2.063884  |
| C | 7.390550  | 2.175002  | 0.945950  |
| C | 5.753174  | 2.053219  | -0.954066 |
| C | 2.332130  | 1.913267  | 0.396154  |
| C | 2.207235  | -0.252165 | 1.224882  |
| C | 2.839911  | -1.540477 | 1.220069  |
| C | 3.555322  | -1.473533 | -2.906351 |
| C | 7.589339  | -2.442183 | -2.471268 |
| H | 7.372700  | -1.205867 | -0.687021 |
| C | 5.566600  | -2.682295 | -3.782385 |
| C | 7.842550  | 1.529915  | 2.122400  |
| H | 7.595795  | -0.156613 | 3.443302  |
| C | 7.897845  | 3.381920  | 0.412367  |
| C | 6.292310  | 3.248092  | -1.439044 |
| C | 1.183236  | 2.282784  | 1.116803  |
| H | 2.855974  | 2.615240  | -0.259241 |
| C | 1.027893  | 0.020218  | 1.966975  |
| C | 2.269750  | -2.529520 | 2.021592  |
| C | 2.833495  | -1.974488 | -3.992260 |
| C | 6.936498  | -2.964544 | -3.568966 |
| H | 8.645184  | -2.648930 | -2.291103 |
| C | 4.791185  | -3.160533 | -4.863383 |
| C | 7.343884  | 3.884908  | -0.754287 |
| H | 5.883215  | 3.676110  | -2.356081 |
| C | 0.518224  | 1.340169  | 1.875304  |
| H | 0.800478  | 3.300433  | 1.025996  |
| C | 0.456453  | -1.035729 | 2.718423  |
| C | 1.089960  | -2.265896 | 2.744052  |
| H | 2.734995  | -3.517389 | 2.050375  |
| C | 3.456345  | -2.800979 | -4.944696 |
| H | 1.779728  | -1.705957 | -4.094518 |
| H | 7.737627  | 4.818512  | -1.165527 |
| H | 0.648377  | -3.075218 | 3.332830  |
| H | 2.857352  | -3.169601 | -5.781859 |
| H | 5.251677  | -3.801923 | -5.617295 |
| H | -0.479399 | -0.870794 | 3.253608  |
| H | 8.712765  | 3.900921  | 0.920595  |
| H | 8.657629  | 1.976901  | 2.698734  |
| H | 7.469793  | -3.599576 | -4.281936 |
| H | -0.418266 | 1.583219  | 2.385109  |

---

**Table S8.** Coordinate of Conformer 5.

| Element | X /Bohr   | Y /Bohr   | Z /Bohr   |
|---------|-----------|-----------|-----------|
| Ir      | -2.452346 | -1.232898 | 0.365948  |
| O       | -3.253220 | -2.265146 | 2.160152  |
| O       | -0.500183 | -2.095811 | 1.018078  |
| C       | -2.596938 | -2.868358 | 3.057155  |
| C       | -0.273413 | -2.778138 | 2.064111  |
| C       | -1.208526 | -3.129202 | 3.056085  |
| C       | -3.412246 | -3.359820 | 4.221999  |
| C       | 1.149326  | -3.243079 | 2.225447  |
| H       | 1.840940  | -2.390891 | 2.147687  |
| H       | 1.333954  | -3.760809 | 3.174264  |
| H       | 1.411861  | -3.924308 | 1.402391  |
| H       | -2.822565 | -3.898846 | 4.972499  |
| H       | -3.910626 | -2.507470 | 4.704907  |
| H       | -4.217057 | -4.015549 | 3.861109  |
| H       | -0.822391 | -3.696197 | 3.905353  |
| C       | -1.779223 | -1.266938 | -2.452120 |
| C       | -1.296575 | -0.828203 | -3.695859 |
| C       | -0.688093 | 0.414589  | -3.809200 |
| C       | -0.552098 | 1.220087  | -2.672984 |
| C       | -1.060561 | 0.806178  | -1.442592 |
| H       | -0.285120 | 0.744305  | -4.769607 |
| H       | -1.366809 | -1.475373 | -4.576273 |
| H       | -0.031502 | 2.180146  | -2.740232 |
| H       | -0.928360 | 1.463264  | -0.578918 |
| C       | -2.314818 | -2.594114 | -2.217266 |
| C       | -2.453175 | -3.614798 | -3.168816 |
| C       | -2.954067 | -4.853502 | -2.796228 |
| H       | -2.163772 | -3.419059 | -4.202565 |
| C       | -3.160006 | -4.033254 | -0.558591 |
| C       | -3.314938 | -5.072279 | -1.463989 |
| H       | -3.064662 | -5.647367 | -3.538229 |
| H       | -3.435000 | -4.131985 | 0.494545  |
| H       | -3.712732 | -6.030089 | -1.127655 |
| C       | -3.371066 | 1.316479  | 1.462665  |
| C       | -3.341313 | 2.521618  | 2.179025  |
| C       | -2.230322 | 2.854950  | 2.938945  |
| C       | -1.147613 | 1.973274  | 2.985354  |
| C       | -1.227272 | 0.791999  | 2.263351  |
| H       | -2.201287 | 3.797798  | 3.489635  |
| H       | -4.197927 | 3.194577  | 2.123490  |
| H       | -0.251451 | 2.202144  | 3.564689  |

---

|    |           |           |           |
|----|-----------|-----------|-----------|
| H  | -0.417814 | 0.058071  | 2.247436  |
| C  | -4.450419 | 0.846851  | 0.612868  |
| C  | -5.656994 | 1.542817  | 0.439047  |
| C  | -6.639730 | 1.037774  | -0.401252 |
| H  | -5.829893 | 2.485865  | 0.965851  |
| C  | -5.216887 | -0.864176 | -0.908322 |
| C  | -6.411837 | -0.167165 | -1.074974 |
| H  | -7.579067 | 1.577797  | -0.536894 |
| H  | -5.073452 | -1.800789 | -1.455774 |
| H  | -7.180119 | -0.566486 | -1.743305 |
| C  | -4.208839 | -0.385250 | -0.056951 |
| C  | -1.691671 | -0.436755 | -1.300894 |
| N  | -2.297654 | 0.473332  | 1.521345  |
| N  | -2.676938 | -2.834184 | -0.919014 |
| Al | 3.304516  | 1.538954  | -0.699290 |
| N  | 3.188829  | 0.783665  | 1.258026  |
| N  | 2.467286  | -0.141514 | -1.469199 |
| C  | 2.211533  | 0.859992  | 2.147388  |
| C  | 4.321913  | 0.107704  | 1.561849  |
| N  | 3.959504  | 3.334717  | 0.023883  |
| O  | 1.613930  | 2.317100  | -0.409592 |
| O  | 3.545626  | 2.010919  | -2.471109 |
| O  | 5.015127  | 0.760482  | -0.569964 |
| C  | 1.819706  | -1.149937 | -0.909079 |
| C  | 2.665542  | -0.133527 | -2.813927 |
| C  | 2.314002  | 0.247624  | 3.411388  |
| H  | 1.324871  | 1.418724  | 1.835860  |
| C  | 4.524601  | -0.546817 | 2.810812  |
| C  | 5.306883  | 0.113308  | 0.516797  |
| C  | 5.191648  | 3.782313  | 0.203902  |
| C  | 2.899500  | 4.116590  | 0.346683  |
| C  | 1.619306  | 3.517628  | 0.089489  |
| C  | 3.254175  | 1.072197  | -3.326327 |
| C  | 1.374084  | -2.253007 | -1.658730 |
| H  | 1.613335  | -1.091833 | 0.162585  |
| C  | 2.272508  | -1.210891 | -3.653093 |
| C  | 3.460618  | -0.449407 | 3.739515  |
| H  | 1.483944  | 0.323051  | 4.117601  |
| C  | 5.746792  | -1.226295 | 3.016669  |
| C  | 6.497633  | -0.573181 | 0.772766  |
| C  | 5.434580  | 5.063814  | 0.732486  |
| H  | 6.000320  | 3.104038  | -0.082602 |
| C  | 3.040817  | 5.420721  | 0.895358  |
| C  | 0.490342  | 4.273964  | 0.416248  |

---

|   |           |           |           |
|---|-----------|-----------|-----------|
| C | 3.439260  | 1.144454  | -4.709065 |
| C | 1.622220  | -2.293706 | -3.014230 |
| H | 0.812808  | -3.039768 | -1.151589 |
| C | 2.500166  | -1.094918 | -5.043771 |
| C | 6.693883  | -1.224574 | 2.004285  |
| H | 7.269049  | -0.594548 | 0.000758  |
| C | 4.369954  | 5.873067  | 1.077761  |
| H | 6.463208  | 5.402311  | 0.864694  |
| C | 1.866082  | 6.145211  | 1.207333  |
| C | 0.632547  | 5.563018  | 0.964627  |
| H | -0.501503 | 3.854016  | 0.231173  |
| C | 3.069821  | 0.067749  | -5.536630 |
| H | 3.873948  | 2.051413  | -5.133353 |
| H | 7.638766  | -1.750956 | 2.165510  |
| H | -0.274217 | 6.126889  | 1.202205  |
| H | 3.235310  | 0.161905  | -6.613669 |
| H | 2.209604  | -1.910069 | -5.710201 |
| H | 1.943828  | 7.149677  | 1.627976  |
| H | 5.931032  | -1.739278 | 3.962569  |
| H | 3.553997  | -0.933595 | 4.715866  |
| H | 1.279871  | -3.142303 | -3.615331 |
| H | 4.544439  | 6.869917  | 1.492597  |

186

### 187 References:

- 188 1. Y. L. Niu, Q. A. Peng, C. M. Deng, X. Gao and Z. G. Shuai, *J.Phys.Chem.A*, 2010, **114** (30), 7817-  
189 7831.
- 190 2. Q. Peng, Y. P. Yi, Z. G. Shuai and J. S. Shao, *J.Am.Chem.Soc*, 2007, **129** (30), 9333-9339.
- 191 3. Z. Shuai, *Chinese.J.Chem*, 2020, **38** (11), 1223-1232.
- 192 4. Q. Peng, Y. L. Niu, Q. H. Shi, X. Gao and Z. G. Shuai, *J. Chem. Theory Comput*, 2013, **9** (2), 1132-  
193 1143.
- 194 5. M. A. El-Sayed, *J.Am.Chem.Soc*, 1968, **1**, 8-16.
- 195 6. T. J. Penfold, E. Gindensperger, C. Daniel and C. M. Marian, *Chem. Rev*, 2018, **118** (15), 6975-7025.
- 196 7. S. Han, R. Deng, Q. Gu, L. Ni, U. Huynh, J. Zhang, Z. Yi, B. Zhao, H. Tamura, A. Pershin, H. Xu,  
197 Z. Huang, S. Ahmad, M. Abdi-Jalebi, A. Sadhanala, M. L. Tang, A. Bakulin, D. Beljonne, X. Liu and  
198 A. Rao, *Nature*, 2020, **587** (7835), 594-599.
- 199 8. Y. Zhao and D. G. Truhlar, *J.Chem.Phys*, 2006, **125** (19), 194101.
- 200 9. S. Grimme, J. Antony, S. Ehrlich and H. Krieg, *J. Chem. Phys*, 2010, **132** (15), 154104.
- 201 10. F. Weigend and R. Ahlrichs, *Phys.Chem.Chem.Phys*, 2005, **7** (18), 3297-305.
- 202 11. F. Weigend, *Phys.Chem.Chem.Phys*, 2006, **8** (9), 1057-1065.
- 203 12. J. D. Rolfes, F. Neese and D. A. Pantazis, *J.Comput.Chem*, 2020, **41** (20), 1842-1849.
- 204 13. D. A. Pantazis, X. Y. Chen, C. R. Landis and F. Neese, *J.Chem.Theory.Comput*, 2008, **4** (6), 908-  
205 919.
- 206 14. F. Weigend and R. Ahlrichs, *Phys.Chem.Chem.Phys*, 2005, **7** (18), 3297-3305.



- 207 15. X. Yi, E. Walia and P. Babyn, *Med.Image.Anal*, 2019, **58**, 101552.  
208 16. F. Neese, *Rev.Comput.Mol.Sci*, 2018, **8** (1), e1327.  
209 17. S. E Wheeler and K. N. Houk, *J.Chem.Theory.Comput*, 2010, **6** (2), 395-404.  
210 18. T. Lu and F. Chen, *J.Comput.Chem*, 2012, **33** (5), 580-592.  
211 19. T. Lu and F. Chen, *J.Mol.Graph.Model*, 2012, **38**, 314-323.  
212 20. M. Xiao and T. Lu, *J. Adv.Phys.Chem*, 2015, **04** (04), 111-124.  
213 21. T. Lu and F. W. Chen, *Acta Physico-Chimica Sinica*, 2012, **28** (1), 1-18.  
214 22. T. Lu and F. Chen, *J.Theor.Comput.Chem*, 2012, **11** (1), 163-183.  
215 23. C. Bannwarth, E. Caldeweyher, S. Ehlert, A. Hansen, P. Pracht, J. Seibert, S. Spicher and S.  
216 Grimme, *Rev.Comput.Mol.Sci*, 2021, **11** (2), e1493.  
217 24. S. Grimme, C. Bannwarth and P. Shushkov, *J. Chem.Theory.Comput*, 2017, **13** (5), 1989-2009.  
218 25. C. Bannwarth, S. Ehlert and S. Grimme, *J. Chem.Theory.Comput*, 2019, **15** (3), 1652-1671.  
219 26. S. Spicher and S. Grimme, *Angew.Chem.Int.Edit*, 2020, **59** (36), 15665-15673.  
220 27. P. Pracht, F. Bohle and S. Grimme, *Phys.Chem.Chem.Phys*, 2020, **22** (14), 7169-7192.  
221  
222
